# Supplementary material
Source: Elsevier journal article supplement (https://www.sciencedirect.com/science/article/pii/S1870345317301781)
Supplement: mmc1 [file S1870345317301781:mmc1.docx]

**Material suplementario**. Lista de artículos científicos en la base de datos de Web of Science con la palabra “paisaje” en el título, el resumen y/o en las palabras clave, dentro de las áreas de investigación de ciencias biológicas, ecológicas, ambientales, y de conservación biológica (búsqueda realizada el 8 de marzo de 2016). De los 546 artículos encontrados, 472 fueron incluidos en la presente revisión y 74 trabajos fueron excluidos, por considerase que no trataban específicamente el tema de ecología del paisaje.

| **Autores** | **Año** | **Título** | **Revista** | **Vol** | **pp** | **pp** | **Tema general** | **Grupo de estudio** | **Región** | **Estado** | **Ambiente** |
| --- | --- | --- | --- | --- | --- | --- | --- | --- | --- | --- | --- |
| Lopez, E; Bocco, G; Mendoza, M; Duhau, E | 2001 | Predicting land-cover and land-use change in the urban fringe - A case in Morelia city, Mexico | LANDSCAPE AND URBAN PLANNING | 55 | 271 | 285 | Ecología urbana | N/A | Morelia | Michoacán | urbano |
| Galindo-Gonzalez, J; Guevara, S; Sosa, VJ | 2000 | Bat- and bird-generated seed rains at isolated trees in pastures in a tropical rainforest | CONSERVATION BIOLOGY | 14 | ### | ### | Árboles aislados | Mamíferos y aves | Los Tuxtlas | Veracruz | tropical |
| Estrada, A; Coates-Estrada, R; Meritt, D | 1993 | Bat species richness and abundance in tropical rain-forest fragments and in agricultural habitats at Los Tuxtlas, Mexico | ECOGRAPHY | 16 | 309 | 318 | Fragmentación | Mamíferos | Los Tuxtlas | Veracruz | tropical |
| Estrada, A; Coates-Estrada, R | 1996 | Tropical rain forest fragmentation and wild populations of primates at Los Tuxtlas, Mexico | INTERNATIONAL JOURNAL OF PRIMATOLOGY | 17 | 759 | 783 | Fragmentación | Mamíferos | Los Tuxtlas | Veracruz | tropical |
| Geoghegan, J; Villar, SC; Klepeis, P; Mendoza, PM; Ogneva-Himmelberger, Y; Chowdhury, RR; Turner, BL; Vance, C | 2001 | Modeling tropical deforestation in the southern Yucatan peninsular region: comparing survey and satellite data | AGRICULTURE ECOSYSTEMS & ENVIRONMENT | 85 | 25 | 46 | Modificación / cambio de uso de suelo | N/A | Península de Yucatán | Yucatán | tropical |
| Estrada, A; Coates-Estrada, R; Meritt, DA | 1997 | Anthropogenic landscape changes and avian diversity at Los Tuxtlas, Mexico | BIODIVERSITY AND CONSERVATION | 6 | 19 | 43 | Modificación / cambio de uso de suelo | Aves | Los Tuxtlas | Veracruz | tropical |
| Harvey, CA.; Komar, O; Chazdon, R; Ferguson, BG.; Finegan, B; Griffith, DM.; Martinez-Ramos, M; Morales, H; Nigh, R; Soto-Pinto, L; Van Breugel, M; Wishnie, M | 2008 | Integrating agricultural landscapes with biodiversity conservation in the Mesoamerican hotspot | CONSERVATION BIOLOGY | 22 | 8 | 15 | Agroecosistemas | N/A | México y otros países | Varios | tropical |
| Guevara, S; Meave, J; Moreno-Casasola, P; Laborde, J | 1992 | Floristic composition and structure of vegetation under isolated trees in Neotropical pastures | JOURNAL OF VEGETATION SCIENCE | 3 | 655 | 664 | Árboles aislados | Plantas | Los Tuxtlas | Veracruz | tropical |
| Bray, DB; Merino-Perez, L; Negreros-Castillo, P; Segura-Warnholtz, G; Torres-Rojo, JM; Vester, HFM | 2003 | Mexico's community-managed forests as a global model for sustainable landscapes | CONSERVATION BIOLOGY | 17 | 672 | 677 | Conservación y manejo | N/A | México (País) | Varios | N/A |
| Philpott, SM; Arendt, WJ; Armbrecht, I; Bichier, P; Diestch, TV; Gordon, C; Greenberg, R; Perfecto, I; Reynoso-Santos, R; Soto-Pinto, L; Tejeda-Cruz, C; Williams-Linera, G; Valenzuela, J; Zolotoff, JM | 2008 | Biodiversity Loss in Latin American Coffee Landscapes: Review of the Evidence on Ants, Birds, and Trees | CONSERVATION BIOLOGY | 22 | ### | ### | Agroecosistemas | Insectos y Aves | México y otros países | Varios | tropical |
| Pineda, E; Moreno, C; Escobar, F; Halffter, G | 2005 | Frog, bat, and dung beetle diversity in the cloud forest and coffee agroecosystems of Veracruz, Mexico | CONSERVATION BIOLOGY | 19 | 400 | 410 | Agroecosistemas | Anfibios, mamíferos e insectos | Veracruz | Veracruz | mesófilo |
| Estrada, A; Coates-Estrada, R; Dadda, AA; Cammarano, P | 1998 | Dung and carrion beetles in tropical rain forest fragments and agricultural habitats at Los Tuxtlas, Mexico | JOURNAL OF TROPICAL ECOLOGY | 14 | 577 | 593 | Fragmentación | Invertebrados | Los Tuxtlas | Veracruz | tropical |
| Estrada, A; Coates-Estrada, R; Meritt, D | 1994 | Non-flying mammals and landscape changes in the tropical rain-forest region of Los Tuxtlas, México | ECOGRAPHY | 17 | 229 | 241 | Fragmentación | Mamíferos | Los Tuxtlas | Veracruz | tropical |
| Estrada, A; Coates-Estrada, R | 2002 | Bats in continuous forest, forest fragments and in an agricultural mosaic habitat-island at Los Tuxtlas, Mexico | BIOLOGICAL CONSERVATION | 103 | 237 | 245 | Fragmentación | Mamíferos | Los Tuxtlas | Veracruz | tropical |
| Halffter, G; Arellano, L | 2002 | Response of dung beetle diversity to human-induced changes in a tropical landscape | BIOTROPICA | 34 | 144 | 154 | Modificación / cambio de uso de suelo | Invertebrados | Veracruz | Veracruz | tropical |
| Urbina-Cardona, JN; Olivares-Perez, M; Reynoso, VH | 2006 | Herpetofauna diversity and microenvironment correlates across a pasture-edge-interior ecotone in tropical rainforest fragments in the Los Tuxtlas Biosphere Reserve of Veracruz, Mexico | BIOLOGICAL CONSERVATION | 132 | 61 | 75 | Efecto de borde | Anfibios y reptiles | Los Tuxtlas | Veracruz | tropical |
| Bray, DB; Sanchez, JLP; Murphy, EC | 2002 | Social dimensions of organic coffee production in Mexico: Lessons for eco-labeling initiatives | SOCIETY & NATURAL RESOURCES | 15 | 429 | 446 | Agroecosistemas | N/A | Unión de ejidos La Selva | Chiapas | tropical |
| Greenberg, R; Bichier, P; Angon, AC | 2000 | The conservation value for birds of cacao plantations with diverse planted shade in Tabasco, Mexico | ANIMAL CONSERVATION | 3 | 105 | 112 | Agroecosistemas | Aves | Tabasco | Tabasco | tropical |
| Pineda, E; Halffter, G | 2004 | Species diversity and habitat fragmentation: frogs in a tropical montane landscape in Mexico | BIOLOGICAL CONSERVATION | 117 | 499 | 508 | Fragmentación | Anfibios | Veracruz | Veracruz | mesófilo |
| Jaramillo, VJ; Kauffman, JB; Renteria-Rodriguez, L; Cummings, DL; Ellingson, LJ | 2003 | Biomass, carbon, and nitrogen pools in Mexican tropical dry forest landscapes | ECOSYSTEMS | 6 | 609 | 629 | Ecología ecosistémica | N/A | Chamela - Cuixmala | Jalisco | tropical |
| Garcia, D; Ortiz-Pulido, R | 2004 | Patterns of resource tracking by avian frugivores at multiple spatial scales: two case studies on discordance among scales | ECOGRAPHY | 27 | 187 | 196 | Uso de hábitat | Aves | México y otros países | Veracruz | tropical |
| Estrada, A; Coates-Estrada, R | 2002 | Dung beetles in continuous forest, forest fragments and in an agricultural mosaic habitat island at Los Tuxtlas, Mexico | BIODIVERSITY AND CONSERVATION | 11 | ### | ### | Fragmentación | Invertebrados | Los Tuxtlas | Veracruz | tropical |
| Escamilla, A; Sanvicente, M; Sosa, M; Galindo-Leal, C | 2000 | Habitat mosaic, wildlife availability, and hunting in the tropical forest of Calakmul, Mexico | CONSERVATION BIOLOGY | 14 | ### | ### | Diseño de reservas | Aves y mamíferos | Campeche | Campeche | tropical |
| Bray, DB; Ellis, EA; Armijo-Canto, N; Beck, CT | 2004 | The institutional drivers of sustainable landscapes: a case study of the 'Mayan Zone' in Quintana Roo, Mexico | LAND USE POLICY | 21 | 333 | 346 | Conservación y manejo | N/A | Península de Yucatán | Quintana Roo | tropical |
| Ibarra-Manriquez, G; Martinez-Ramos, M | 2002 | Landscape variation of liana communities in a Neotropical rain forest | PLANT ECOLOGY | 160 | 91 | 112 | Distribución | Plantas | Lacandona | Chiapas | tropical |
| Estrada, A; Cammarano, P; Coates-Estrada, R | 2000 | Bird species richness in vegetation fences and in strips of residual rain forest vegetation at Los Tuxtlas, Mexico | BIODIVERSITY AND CONSERVATION | 9 | ### | ### | Cercas vivas | Aves | Los Tuxtlas | Veracruz | tropical |
| Quintana-Ascencio, PF; Gonzalez-Espinosa, M; Ramirez-Marcial, N; Dominguez-Vazquez, G; Martinez-Ico, M | 1996 | Soil seed banks and regeneration of tropical rain forest from milpa fields at the Silva Lacandona, Chiapas, Mexico | BIOTROPICA | 28 | 192 | 209 | Restauración - Sucesión ecológica | Plantas | Lacandona | Chiapas | tropical |
| Ellis, EA; Porter-Bolland, L | 2008 | Is community-based forest management more effective than protected areas? A comparison of land use/land cover change in two neighboring study areas of the Central Yucatan Peninsula, Mexico | FOREST ECOLOGY AND MANAGEMENT | 256 | ### | ### | Conservación y manejo | N/A | Península de Yucatán | Yucatán | tropical |
| Vester, HFM; Lawrence, D; Eastman, JR; Turner, BLII; Calme, S; Dickson, R; Pozo, C; Sangermano, F | 2007 | Land change in the southern Yucatan and Calakmul Biosphere Reserve: Effects on habitat and biodiversity | ECOLOGICAL APPLICATIONS | 17 | 989 | ### | Fragmentación | N/A | Sureste de México | Varios | tropical |
| Moreno, CE; Halffter, G | 2001 | Spatial and temporal analysis of alpha, beta and gamma diversities of bats in a fragmented landscape | BIODIVERSITY AND CONSERVATION | 10 | 367 | 382 | Modificación / cambio de uso de suelo | Mamíferos | Veracruz | Veracruz | tropical |
| Fuller, T; Munguia, M; Mayfield, M; Sanchez-Cordero, V; Sarkar, S | 2006 | Incorporating connectivity into conservation planning: A multi-criteria case study from central Mexico | BIOLOGICAL CONSERVATION | 133 | 131 | 142 | Conectividad | Mamíferos | Centro de México | Varios | varios |
| Cruz-Angon, A; Greenberg, R | 2005 | Are epiphytes important for birds in coffee plantations? An experimental assessment | JOURNAL OF APPLIED ECOLOGY | 42 | 150 | 159 | Agroecosistemas | Aves | Coatepec | Veracruz | tropical |
| Estrada, A; Mendoza, A; Castellanos, L; Pacheco, R; Van Belle, S; Garcia, Y; Munoz, D | 2002 | Population of the black howler monkey (Alouatta pigra) in a fragmented landscape in Palenque, Chiapas, Mexico | AMERICAN JOURNAL OF PRIMATOLOGY | 58 | 45 | 55 | Distribución | Mamíferos | Palenque | Chiapas | tropical |
| Lobo, JM; Halffter, G | 2000 | Biogeographical and ecological factors affecting the altitudinal variation of mountainous communities of coprophagous beetles (Coleoptera : Scarabaeoidea): a comparative study | ANNALS OF THE ENTOMOLOGICAL SOCIETY OF AMERICA | 93 | 115 | 126 | Distribución | Invertebrados | Centro de México | Veracruz | montaña |
| Arroyo-Rodriguez, V; Pineda, E; Escobar, F; Benitez-Malvido, J | 2009 | Value of Small Patches in the Conservation of Plant-Species Diversity in Highly Fragmented Rainforest | CONSERVATION BIOLOGY | 23 | 729 | 739 | Fragmentación | Plantas | Los Tuxtlas | Veracruz | tropical |
| Flores-Palacios, A; Garcia-Franco, JG | 2006 | The relationship between tree size and epiphyte species richness: testing four different hypotheses | JOURNAL OF BIOGEOGRAPHY | 33 | 323 | 330 | Modificación / cambio de uso de suelo | Plantas | San Andrés Tlalnelhuayocan | Veracruz | mesófilo |
| Guevara, S; Laborde, J; Sanchez-Rios, G | 2004 | Rain forest regeneration beneath the canopy of fig trees isolated in pastures of Los Tuxtlas, Mexico | BIOTROPICA | 36 | 99 | 108 | Árboles aislados | Plantas | Los Tuxtlas | Veracruz | tropical |
| Estrada, A; Coates-Estrada, R | 2001 | Bat species richness in live fences and in corridors of residual rain forest vegetation at Los Tuxtlas, Mexico | ECOGRAPHY | 24 | 94 | 102 | Cercas vivas | Mamíferos | Los Tuxtlas | Veracruz | tropical |
| Guevara, S; Laborde, J | 1993 | Monitoring seed dispersal at isolated standing trees in tropical pastures - consequences for local species availability | VEGETATIO | 108 | 319 | 338 | Árboles aislados | Aves | Los Tuxtlas | Veracruz | tropical |
| Gordon, C; Manson, R; Sundberg, J; Cruz-Angon, A | 2007 | Biodiversity, profitability, and vegetation structure in a Mexican coffee agroecosystern | AGRICULTURE ECOSYSTEMS & ENVIRONMENT | 118 | 256 | 266 | Agroecosistemas | Aves y mamíferos | Centro de Veracruz | Veracruz | tropical |
| Rojas-Soto, OR; Alcantara-Ayala, O; Navarro, AG | 2003 | Regionalization of the avifauna of the Baja California Peninsula, Mexico: a parsimony analysis of endemicity and distributional modelling approach | JOURNAL OF BIOGEOGRAPHY | 30 | 449 | 461 | Distribución | Aves | Baja California | Baja california | semiárido |
| Ortega-Alvarez, R; MacGregor-Fors, I | 2009 | Living in the big city: Effects of urban land-use on bird community structure, diversity, and composition | LANDSCAPE AND URBAN PLANNING | 90 | 189 | 195 | Ecología urbana | Aves | Centro de México | Estado de México | urbano |
| Cairns, MA; Haggerty, PK; Alvarez, R; De Jong, BHJ; Olmsted, I | 2000 | Tropical Mexico's recent land-use change: A region's contribution to the global carbon cycle | ECOLOGICAL APPLICATIONS | 10 | ### | ### | Ecología ecosistémica | N/A | Sureste de México | Varios | tropical |
| van Vliet, N; Mertz, O; Heinimann, A; Langanke, T; Pascual, U; Schmook, B; Adams, C; Schmidt-Vogt, D; Messerli, P; Leisz, S; Castella, JC; Jorgensen, L; Birch-Thomsen, T; Hett, C; Bruun, TB; Ickowitz, A; Kim CV; Yasuyuki, K; Fox, J; Padoch, C; Dressler, W; Ziegler, AD | 2012 | Trends, drivers and impacts of changes in swidden cultivation in tropical forest-agriculture frontiers: A global assessment | GLOBAL ENVIRONMENTAL CHANGE-HUMAN AND POLICY DIMENSIONS | 22 | 418 | 429 | Agroforestería | N/A | Análisis global | Varios | tropical |
| Parra-Tabla, V; Vargas, CF; Magana-Rueda, S; Navarro, J | 2000 | Female and male pollination success of Oncidium ascendens Lindey (Orchidaceae) in two contrasting habitat patches: forest vs agricultural field | BIOLOGICAL CONSERVATION | 94 | 335 | 340 | Fragmentación | Plantas | Reserva Natural de Dzilam | Yucatán | tropical |
| Burgos, A; Maass, JM | 2004 | Vegetation change associated with land-use in tropical dry forest areas of Western Mexico | AGRICULTURE ECOSYSTEMS & ENVIRONMENT | 104 | 475 | 481 | Modificación / cambio de uso de suelo | N/A | Oeste de México, Chamela | Jalisco | tropical |
| Brush, SB; Perales, HR | 2007 | A maize landscape: Ethnicity and agro-biodiversity in Chiapas Mexico | AGRICULTURE ECOSYSTEMS & ENVIRONMENT | 121 | 211 | 221 | Agroecosistemas | Plantas | Chiapas | Chiapas | tropical |
| Estrada, A; Coates-Estrada, R | 2001 | Species composition and reproductive phenology of bats in a tropical landscape at Los Tuxtlas, Mexico | JOURNAL OF TROPICAL ECOLOGY | 17 | 627 | 646 | Modificación / cambio de uso de suelo | Mamíferos | Los Tuxtlas | Veracruz | tropical |
| Mas, JF | 2005 | Assessing protected area effectiveness using surrounding (buffer) areas environmentally similar to the target area | ENVIRONMENTAL MONITORING AND ASSESSMENT | 105 | 69 | 80 | Diseño de reservas | N/A | Calakmul | Campeche | tropical |
| Verdu, JR; Moreno, CE; Sanchez-Rojas, G; Numa, C; Galante, E; Halffter, G | 2007 | Grazing promotes dung beetle diversity in the xeric landscape of a Mexican Biosphere Reserve | BIOLOGICAL CONSERVATION | 140 | 308 | 317 | Modificación / cambio de uso de suelo | Invertebrados | Reserva de la Biosfera Barranca de Metzitlán | Hidalgo | semiárido |
| Winker, K; Escalante, P; Rappole, JH; Ramos, MA; Oehlenschlager, RJ; Warner, DW | 1997 | Periodic migration and lowland forest refugia in a ''sedentary'' neotropical bird, Wetmore's Bush-Tanager | CONSERVATION BIOLOGY | 11 | 692 | 697 | Distribución | Aves | Los Tuxtlas | Veracruz | tropical |
| Warkentin, IG; Greenberg, R; Ortiz, JS | 1995 | Songbird use of gallery woodlands in recently cleared and older settled landscapes of the selva-Lacandona, Chiapas, México. | CONSERVATION BIOLOGY | 9 | ### | ### | Uso de hábitat | Aves | Lacandona | Chiapas | tropical |
| Peterson, AT; Sanchez-Cordero, V; Martinez-Meyer, E; Navarro-Siguenza, AG | 2006 | Tracking population extirpations via melding ecological niche modeling with land-cover information | ECOLOGICAL MODELLING | 195 | 229 | 236 | Distribución | Aves | México (País) | Varios | varios |
| Cayuela, L; Golicher, DJ; Rey BJM; Gonzalez-Espinosa, M; Ramirez-Marcial, N | 2006 | Fragmentation, disturbance and tree diversity conservation in tropical montane forests | JOURNAL OF APPLIED ECOLOGY | 43 | ### | ### | Fragmentación | Plantas | Los Altos de Chiapas | Chiapas | montaña |
| Figueroa, F; Sanchez-Cordero, V | 2008 | Effectiveness of natural protected areas to prevent land use and land cover change in Mexico | BIODIVERSITY AND CONSERVATION | 17 | ### | ### | Diseño de reservas | N/A | México (País) | Varios | varios |
| De Jong, BHJ; Cairns, MA; Haggerty, PK; Ramirez-Marcial, N; Ochoa-Gaona, S; Mendoza-Vega, J; Gonzalez-Espinosa, M; March-Mifsut, I | 1999 | Land-use change and carbon flux between 1970s and 1990s in central highlands of Chiapas, Mexico | ENVIRONMENTAL MANAGEMENT | 23 | 373 | 385 | Ecología ecosistémica | N/A | Los Altos de Chiapas | Chiapas | montaña |
| Arroyo-Rodriguez, V; Dias, PAD | 2010 | Effects of Habitat Fragmentation and Disturbance on Howler Monkeys: A Review | AMERICAN JOURNAL OF PRIMATOLOGY | 72 | 1 | 16 | Fragmentación | Mamíferos | México y otros países | N/A | tropical |
| Gonzalez-Zamora, A; Arroyo-Rodriguez, V; Chaves, OM; Sanchez-Lopez, S; Stoner, KE; Riba-Hernandez, P | 2009 | Diet of Spider Monkeys (Ateles geoffroyi) in Mesoamerica: Current Knowledge and Future Directions | AMERICAN JOURNAL OF PRIMATOLOGY | 71 | 8 | 20 | Uso de hábitat | Mamíferos | México y otros países | Varios | tropical |
| Bindlish, R; Jackson, TJ; Gasiewski, A; Stankov, B; Klein, M; Cosh, MH; Mladenova, I; Watts, C; Vivoni, E; Lakshmi, V; Bolten, J; Keefer, T | 2008 | Aircraft based soil moisture retrievals under mixed vegetation and topographic conditions | REMOTE SENSING OF ENVIRONMENT | 112 | 375 | 390 | Ecología ecosistémica | N/A | Arizona (EE.UU.) y Sonora (México) | Sonora | semiárido |
| Davidson, AD.; Lightfoot, DC | 2006 | Keystone rodent interactions: prairie dogs and kangaroo rats structure the biotic composition of a desertified grassland | ECOGRAPHY | 29 | 755 | 765 | Distribución | Mamíferos | Janos-Casas Grandes | Chihuahua | Pastizal |
| Dalle, SP; de Blois, S; Caballero, J; Johns, T | 2006 | Integrating analyses of local land-use regulations, cultural perceptions and land-use/land cover data for assessing the success of community-based conservation | FOREST ECOLOGY AND MANAGEMENT | 222 | 370 | 383 | Conservación y manejo | N/A | Península de Yucatán | Quintana Roo | tropical |
| Gonzalez-Espinosa, M; Rey-Benayas, JM; Ramirez-Marcial, N; Huston, MA; Golicher, D | 2004 | Tree diversity in the northern Neotropics: regional patterns in highly diverse Chiapas, Mexico | ECOGRAPHY | 27 | 741 | 756 | Distribución | Plantas | Chiapas | Chiapas | tropical |
| Ochoa-Gaona, S | 2001 | Traditional land-use systems and patterns of forest fragmentation in the highlands of Chiapas, Mexico | ENVIRONMENTAL MANAGEMENT | 27 | 571 | 586 | Fragmentación | N/A | Los Altos de Chiapas | Chiapas | montaña |
| Fule, PZ; Villanueva-Diaz, J; Ramos-Gomez, M | 2005 | Fire regime in a conservation reserve in Chihuahua, Mexico | CANADIAN JOURNAL OF FOREST RESEARCH-REVUE CANADIENNE DE RECHERCHE FORESTIERE | 35 | 320 | 330 | Diseño de reservas | Plantas | Sierra Madre occidental | Chihuahua | árido |
| Graham, C; Martinez-Leyva, JE; Cruz-Paredes, L | 2002 | Use of fruiting trees by birds in continuous forest and riparian forest remnants in Los Tuxtlas, Veracruz, Mexico | BIOTROPICA | 34 | 589 | 597 | Fragmentación | Aves | Los Tuxtlas | Veracruz | tropical |
| Berlanga-Robles, CA; Ruiz-Luna, A | 2002 | Land use mapping and change detection in the coastal zone of northwest Mexico using remote sensing techniques | JOURNAL OF COASTAL RESEARCH | 18 | 514 | 522 | Modificación / cambio de uso de suelo | N/A | Mahahual, noroeste de México | Quintana Roo | tropical |
| Lozano-Garcia, MD; Ortega-Guerrero, B | 1998 | Late Quaternary environmental changes of the central part of the Basin of Mexico; Correlation between Texcoco and Chalco basins | REVIEW OF PALAEOBOTANY AND PALYNOLOGY | 99 | 77 | 93 | Modificación / cambio de uso de suelo | N/A | Centro de México | Estado de México | Montaña |
| MAUCHAMP, A; MONTANA, C; LEPART, J; RAMBAL, S | 1993 | Ecotone dependent recruitment of a desert shrub, fluorensia-cernua, in vegetation stripes | OIKOS | 68 | 107 | 116 | Efecto de borde | Plantas | Reserva Mapimi | Varios | árido |
| Arroyo-Rodriguez, V; Mandujano, S; Benitez-Malvido, J; Cuende-Fanton, C | 2007 | The influence of large tree density on howler monkey (Alouatta palliata mexicana) presence in very small rain forest fragments | BIOTROPICA | 39 | 760 | 766 | Fragmentación | Mamíferos | Los Tuxtlas | Veracruz | tropical |
| Pozo-Montuy, G; Serio-Silva, JC | 2007 | Movement and resource use by a group of Alouatta pigra in a forest fragment in Balancan, Mexico | PRIMATES | 48 | 102 | 107 | Uso de hábitat | Mamíferos | Balancán | Tabasco | tropical |
| Navarrete, D; Halffter, G | 2008 | Dung beetle (Coleoptera : Scarabaeidae : Scarabaeinae) diversity in continuous forest, forest fragments and cattle pastures in a landscape of Chiapas, Mexico: the effects of anthropogenic changes | BIODIVERSITY AND CONSERVATION | 17 | ### | ### | Fragmentación | Invertebrados | Lacandona | Chiapas | tropical |
| Davidson, AD; Lightfoot, DC | 2007 | Interactive effects of keystone rodents on the structure of desert grassland arthropod communities | ECOGRAPHY | 30 | 515 | 525 | Uso de hábitat | Vertebrados | Nuevo México (U.S.) y Chiuaua (México) | Chihuahua | árido |
| Anzures-Dadda, A; Manson, RH | 2007 | Patch- and landscape-scale effects on howler monkey distribution and abundance in rainforest fragments | ANIMAL CONSERVATION | 10 | 69 | 76 | Fragmentación | Mamíferos | Norte de Chiapas | Chiapas | tropical |
| Lobell, DB; Ortiz-Monasterio, JI | 2006 | Regional importance of crop yield constraints: Linking simulation models and geostatistics to interpret spatial patterns | ECOLOGICAL MODELLING | 196 | 173 | 182 | Agroecosistemas | N/A | Yaqui Valley | Sonora | Semiárido |
| Martorell, C; Peters, EM | 2005 | The measurement of chronic disturbance and its effects on the threatened cactus Mammillaria pectinifera | BIOLOGICAL CONSERVATION | 124 | 199 | 207 | Modificación / cambio de uso de suelo | Plantas | Tehuacán Valley | Puebla | Semiárido |
| Martinez-Morales, MA | 2005 | Nested species assemblages as a tool to detect sensitivity to forest fragmentation: the case of cloud forest birds | OIKOS | 108 | 634 | 642 | Fragmentación | Aves | Noreste de Hidalgo | Hidalgo | mesófilo |
| Gordon, JE; Hawthorne, WD; Reyes-Garcia, A; Sandoval, G; Barrance, AJ | 2004 | Assessing landscapes: a case study of tree and shrub diversity in the seasonally dry tropical forests of Oaxaca, Mexico and southern Honduras | BIOLOGICAL CONSERVATION | 117 | 429 | 442 | Modificación / cambio de uso de suelo | Plantas | Oaxaca y Honduras | Oaxaca | tropical |
| Ceballos, G | 2007 | Conservation priorities for mammals in megadiverse Mexico: The efficiency of reserve networks | ECOLOGICAL APPLICATIONS | 17 | 569 | 578 | Conservación y manejo | Mamíferos | México (País) | Varios | varios |
| Arroyo-Rodriguez, V; Mandujano, S | 2006 | The importance of tropical rain forest fragments to the conservation of plant species diversity in Los Tuxtlas, Mexico | BIODIVERSITY AND CONSERVATION | 15 | ### | ### | Fragmentación | Plantas | Los Tuxtlas | Veracruz | tropical |
| Ochoa-Gaona, S; Gonzalez-Espinosa, M; Meave, JA; Bon, VSD | 2004 | Effect of forest fragmentation on the woody flora of the highlands of Chiapas, Mexico | BIODIVERSITY AND CONSERVATION | 13 | 867 | 884 | Fragmentación | Plantas | Los Altos de Chiapas | Chiapas | montaña |
| Nelson, MR; Felix-Gastelum, R; Orum, TV; Stowell, LJ; Myers, DE | 1994 | Geographic Information Sstems and geostatistics in the design and validation of regional plant-virus management programs | PHYTOPATHOLOGY | 84 | 898 | 905 | Conservación y manejo | Varios | Valle del Fuerte | Sinaloa | Semiárido |
| Bryson, RWJ; Nieto-Montes, A; Jaeger, JR; Riddle, BR | 2010 | Elucidation of cryptic diversity in a widespread nearctic treefrog reveals episodes of mitchondrial gene capture as frogs diversified across a dynamic landscape | EVOLUTION | 64 | ### | ### | Genética del paisaje | Anfibios | México (País) | Varios | varios |
| Flamenco-Sandoval, A; Martinez-Ramos, M: Masera, OR | 2007 | Assessing implications of land-use and land-cover change dynamics for conservation of a highly diverse tropical rain forest | BIOLOGICAL CONSERVATION | 138 | 131 | 145 | Modificación / cambio de uso de suelo | N/A | Reserva de la biosfera selva El Ocote | Chiapas | tropical |
| Montiel, S; Estrada, A; Leon, P | 2006 | Bat assemblages in a naturally fragmented ecosystem in the Yucatan Peninsula, Mexico: species richness, diversity and spatio-temporal dynamics | JOURNAL OF TROPICAL ECOLOGY | 22 | 267 | 276 | Uso de hábitat | Mamíferos | Península de Yucatán | Campeche | tropical |
| Pinkus-Rendon, MA; Leon-Cortes, JL; Ibarra-Nunez, G | 2006 | Spider diversity in a tropical habitat gradient in Chiapas, Mexico | DIVERSITY AND DISTRIBUTIONS | 12 | 61 | 69 | Uso de hábitat | Invertebrados | Chiapas | Chiapas | tropical |
| Ruiz-Luna, A; Berlanga-Robles, CA | 2003 | Land use, land cover changes and coastal lagoon surface reduction associated with urban growth in northwest Mexico | LANDSCAPE ECOLOGY | 18 | 159 | 171 | Modificación / cambio de uso de suelo | N/A | Noroeste de México | Sinaloa | Semiárido |
| Violi, HA; Barrientos-Priego, AF; Wright, SF; Escamilla-Prado, E; Morton, JB; Menge, JA; Lovatt, CJ | 2008 | Disturbance changes arbuscular mycorrhizal fungal phenology and soil glomalin concentrations but not fungal spore composition in montane rainforests in Veracruz and Chiapas, Mexico | FOREST ECOLOGY AND MANAGEMENT | 254 | 276 | 290 | Modificación / cambio de uso de suelo | Hongos | Sureste de México | Varios | tropical |
| Jaramillo, VJ; Ahedo-Hernandez, R; Kauffman, JB | 2003 | Root biomass and carbon in a tropical evergreen forest of Mexico: changes with secondary succession and forest conversion to pasture | JOURNAL OF TROPICAL ECOLOGY | 19 | 457 | 464 | Restauración - Sucesión ecológica | N/A | Los Tuxtlas | Veracruz | tropical |
| Estrada, A; Rivera, A; Coates-Estrada, R | 2002 | Predation of artificial nests in a fragmented landscape in the tropical region of Los Tuxtlas, Mexico | BIOLOGICAL CONSERVATION | 106 | 199 | 209 | Modificación / cambio de uso de suelo | Aves | Los Tuxtlas | Veracruz | tropical |
| McAuliffe, JR; Sundt, PC; Valiente-Banuet, A; Casas, A; Viveros, JL | 2001 | Pre-columbian soil erosion, persistent ecological changes, and collapse of a subsistence agricultural economy in the semi-arid Tehuacan Valley, Mexico's 'Cradle of Maize' | JOURNAL OF ARID ENVIRONMENTS | 47 | 47 | 75 | Modificación / cambio de uso de suelo | N/A | Tehuacán-Cuicatlán-Zapotitlán | Puebla | semiárido |
| Ortiz-Pulido, R; Laborde, J; Guevara, S | 2000 | Fruit-eating habits of birds in a fragmented landscape: Implications for seed dispersal | BIOTROPICA | 32 | 473 | 488 | Modificación / cambio de uso de suelo | Aves | Veracruz | Veracruz | mesófilo |
| Arroyo-Rodriguez, V; Mandujano, S | 2009 | Conceptualization and Measurement of Habitat Fragmentation from the Primates' Perspective | INTERNATIONAL JOURNAL OF PRIMATOLOGY | 30 | 497 | 514 | Métodos de análisis | Mamíferos | N/A | N/A | N/A |
| Vergara, CH; Badano, EI | 2009 | Pollinator diversity increases fruit production in Mexican coffee plantations: The importance of rustic management systems | AGRICULTURE ECOSYSTEMS & ENVIRONMENT | 129 | 117 | 123 | Agroecosistemas | Invertebrados | Veracruz | Veracruz | tropical |
| Arroyo-Rodriguez, V; Aguirre, A; Benitez-Malvido, J; Mandujano, S | 2007 | Impact of rain forest fragmentation on the population size of a structurally important palm species: Astrocaryum mexicanum at Los Tuxtlas, Mexico | BIOLOGICAL CONSERVATION | 138 | 198 | 206 | Fragmentación | Plantas | Los Tuxtlas | Veracruz | tropical |
| Gove, AD; Majer, JD; Rico-Gray, V | 2005 | Methods for conservation outside of formal reserve systems: The case of ants in the seasonally dry tropics of Veracruz, Mexico | BIOLOGICAL CONSERVATION | 126 | 328 | 338 | Diseño de reservas | Invertebrados | Veracruz | Veracruz | tropical |
| Ruiz-Luna, A; Berlanga-Robles, CA | 1999 | Modifications in coverage patterns and land use around the Huizache-Caimanero lagoon system, Sinaloa, Mexico: A multi-temporal analysis using LANDSAT images | ESTUARINE COASTAL AND SHELF SCIENCE | 49 | 37 | 44 | Modificación / cambio de uso de suelo | N/A | Laguna de Huizache-Caimanero | Sinaloa | semiárido |
| Toledo-Aceves, T; Meave, JA; Gonzalez-Espinosa, M; Ramirez-Marcial, N | 2011 | Tropical montane cloud forests: Current threats and opportunities for their conservation and sustainable management in Mexico | JOURNAL OF ENVIRONMENTAL MANAGEMENT | 92 | 974 | 981 | Conservación y manejo | N/A | México (País) | Varios | mesófilo |
| Lopez-Gomez, AA; Williams-Linera, G; Manson, RH | 2008 | Tree species diversity and vegetation structure in shade coffee farms in Veracruz, Mexico | AGRICULTURE ECOSYSTEMS & ENVIRONMENT | 124 | 160 | 172 | Agroecosistemas | Plantas | Veracruz | Veracruz | tropical |
| Arroyo-Rodriguez, V; Mandujano, S; Benitez-Malvido, J | 2008 | Landscape attributes affecting patch occupancy by howler monkeys (Alouatta palliata mexicana) at Los tuxtlas, Mexico | AMERICAN JOURNAL OF PRIMATOLOGY | 70 | 69 | 77 | Modificación / cambio de uso de suelo | Mamíferos | Los Tuxtlas | Veracruz | tropical |
| Arellano, L; Favila, ME; Huerta, C | 2005 | Diversity of dung and carrion beetles in a disturbed Mexican tropical montane cloud forest and on shade coffee plantations | BIODIVERSITY AND CONSERVATION | 14 | 601 | 615 | Agroecosistemas | Invertebrados | Xalapa | Veracruz | mesófilo |
| Landa, R; Meave, J; Carabias, J | 1997 | Environmental deterioration in rural Mexico: An examination of the concept | ECOLOGICAL APPLICATIONS | 7 | 316 | 329 | Modificación / cambio de uso de suelo | N/A | La Montaña | Guerrero | tropical |
| Rodriguez-Soto, C; Monroy-Vilchis, O; Maiorano, L; Boitani, L; Carlos-Faller, J; Briones, MA; Nunez, R; Rosas-Rosas, O; Ceballos, G; Falcucci, A | 2011 | Predicting potential distribution of the jaguar (Panthera onca) in Mexico: identification of priority areas for conservation | DIVERSITY AND DISTRIBUTIONS | 17 | 350 | 361 | Distribución | Mamíferos | México (País) | Varios | varios |
| Lopez-Barrera, F; Manson, RH; Gonzalez-Espinosa, M; Newton, AC | 2006 | Effects of the type of montane forest edge on oak seedling establishment along forest-edge-exterior gradients | FOREST ECOLOGY AND MANAGEMENT | 225 | 234 | 244 | Efecto de borde | Plantas | Los Altos de Chiapas | Chiapas | montaña |
| Martinez-Morales, MA | 2005 | Landscape patterns influencing bird assemblages in a fragmented neotropical cloud forest | BIOLOGICAL CONSERVATION | 121 | 117 | 126 | Fragmentación | Aves | Hidalgo | Hidalgo | mesófilo |
| Otero-Arnaiz, A; Castillo, S; Meave, J; Ibarra-Manriquez, G | 1999 | Isolated pasture trees and the vegetation under their canopies in the Chiapas Coastal Plain, Mexico | BIOTROPICA | 31 | 243 | 254 | Árboles aislados | Plantas | Chiapas | Chiapas | tropical |
| Castro-Luna, A. A.; Sosa, V. J.; Castillo-Campos, G. | 2007 | Bat diversity and abundance associated with the degree of secondary succession in a tropical forest mosaic in south-eastern Mexico | ANIMAL CONSERVATION | 10 | 219 | 228 | Restauración - Sucesión ecológica | Mamíferos | Parque Agua Blanca | Tabasco | tropical |
| Meza-Figueroa, D; Maier, RM; de la O-Villanueva, M; Gomez-Alvarez, A; Moreno-Zazueta, A; Rivera, J; Campillo, A; Grandlic, CJ; Anaya, R; Palafox-Reyes, J | 2009 | The impact of unconfined mine tailings in residential areas from a mining town in a semi-arid environment: Nacozari, Sonora, Mexico | CHEMOSPHERE | 77 | 140 | 147 | Modificación / cambio de uso de suelo | N/A | Sonora | Sonora | semiárido |
| Castillo-Campos, G; Halffter, G; Moreno, CE | 2008 | Primary and secondary vegetation patches as contributors to floristic diversity in a tropical deciduous forest landscape | BIODIVERSITY AND CONSERVATION | 17 | ### | ### | Restauración - Sucesión ecológica | Plantas | Veracruz | Veracruz | tropical |
| Arellano, L; Leon-Cortes, JL; Ovaskainen, O | 2008 | Patterns of abundance and movement in relation to landscape structure: a study of a common scarab (Canthon cyanellus cyanellus) in Southern Mexico | LANDSCAPE ECOLOGY | 23 | 69 | 78 | Fragmentación | Invertebrados | Sureste de México | Chiapas | tropical |
| Trejo-Macias, G; Estrada, A; Cabrera, MAM | 2007 | Survey of helminth parasites in populations of Alouatta palliata mexicana and A-Pigra in continuous and in fragmented habitat in southern mexico | INTERNATIONAL JOURNAL OF PRIMATOLOGY | 28 | 931 | 945 | Fragmentación | Mamíferos | Sureste de México | Varios | tropical |
| Estrada, A; Coates-Estrada, R | 2005 | Diversity of Neotropical migratory landbird species assemblages in forest fragments and man-made vegetation in Los Tuxtlas, Mexico | BIODIVERSITY AND CONSERVATION | 14 | ### | ### | Fragmentación | Aves | Los Tuxtlas | Veracruz | tropical |
| Rodriguez, AD; Rodriguez, MH; Hernandez, JE; Dister, SW; Beck, LR; Rejmankova, E; Roberts, DR | 1996 | Landscape surrounding human settlements and Anopheles albimanus (Diptera: Culicidae) abundance in southern Chiapas, Mexico | JOURNAL OF MEDICAL ENTOMOLOGY | 33 | 39 | 48 | Ecología urbana | Invertebrados | Chiapas | Chiapas | urbano |
| Hernandez-Martinez, G; Manson, RH; Contreras-Hernandez, A | 2009 | Quantitative classification of coffee agroecosystems spanning a range of production intensities in central Veracruz, Mexico | AGRICULTURE ECOSYSTEMS & ENVIRONMENT | 134 | 89 | 98 | Agroecosistemas | N/A | Veracruz | Veracruz | mesófilo |
| Aguilar-Stoen, Mariel; Moe, Stein R.; Lucia Camargo-Ricalde, Sara | 2009 | Home Gardens Sustain Crop Diversity and Improve Farm Resilience in Candelaria Loxicha, Oaxaca, Mexico | HUMAN ECOLOGY | 37 | 55 | 77 | Conservación y manejo | N/A | Candelaria Loxicha | Oaxaca | tropical |
| Urquiza-Haas, T; Peres, CA; Dolman, PM | 2009 | Regional scale effects of human density and forest disturbance on large-bodied vertebrates throughout the Yucatan Peninsula, Mexico | BIOLOGICAL CONSERVATION | 142 | 134 | 148 | Modificación / cambio de uso de suelo | Aves y mamíferos | Península de Yucatán | Yucatán | tropical |
| Toledo, VM; Barrera-Bassols, N; Garcia-Frapolli, E; Alarcon-Chaires, P | 2008 | Multiple use and biodiversity within the Mayan communities of Yucatan, Mexico | INTERCIENCIA | 33 | 345 | 352 | Conservación y manejo | N/A | Península de Yucatán | Yucatán | tropical |
| Arriaga-Weiss, SL; Calme, S; Kampichler, C | 2008 | Bird communities in rainforest fragments: guild responses to habitat variables in Tabasco, Mexico | BIODIVERSITY AND CONSERVATION | 17 | 173 | 190 | Fragmentación | Aves | Tabasco | Tabasco | tropical |
| Perez-Garcia, EA; Meave, JA | 2006 | Coexistence and divergence of tropical dry forests and savannas in southern Mexico | JOURNAL OF BIOGEOGRAPHY | 33 | 438 | 447 | Distribución | Plantas | Sureste de México | Oaxaca | tropical |
| Bonfil, C.; Soberon, J. | 1999 | Quercus rugosa seedling dynamics in relation to its re-introduction in a disturbed Mexican landscape | APPLIED VEGETATION SCIENCE | 2 | 189 | 200 | Restauración - Sucesión ecológica | Plantas | Centro de México | Estado de México | Montaña |
| Asbjornsen, H; Ashton, MS; Vogt, DJ; Palacios, S | 2004 | Effects of habitat fragmentation on the buffering capacity of edge environments in a seasonally dry tropical oak forest ecosystem in Oaxaca, Mexico | AGRICULTURE ECOSYSTEMS & ENVIRONMENT | 103 | 481 | 495 | Fragmentación | N/A | Oaxaca | Oaxaca | tropical |
| Galindo-Gonzalez, J; Sosa, VJ | 2003 | Frugivorous bats in isolated trees and riparian vegetation associated with human-made pastures in a fragmented tropical landscape | SOUTHWESTERN NATURALIST | 48 | 579 | 589 | Árboles aislados | Mamíferos | Los Tuxtlas | Veracruz | tropical |
| Jimenez Aguilar, A.; Huber-Sannwald, E.; Belnap, J.; Smart, D. R.; Arredondo Moreno, J. T. | 2009 | Biological soil crusts exhibit a dynamic response to seasonal rain and release from grazing with implications for soil stability | JOURNAL OF ARID ENVIRONMENTS | 73 | ### | ### | Modificación / cambio de uso de suelo | N/A | Loma La Biznaga | San Luis Potosí | semiárido |
| Asensio, N; Arroyo-Rodriguez, V; Dunn, JC.; Cristobal-Azkarate, J | 2009 | Conservation Value of Landscape Supplementation for Howler Monkeys Living in Forest Patches | BIOTROPICA | 41 | 768 | 773 | Fragmentación | Mamíferos | Los Tuxtlas | Veracruz | tropical |
| Hernandez-Stefanoni, JL; Dupuy, JM | 2008 | Effects of landscape patterns on species density and abundance of trees in a tropical subdeciduous forest of the Yucatan Peninsula | FOREST ECOLOGY AND MANAGEMENT | 255 | ### | ### | Modificación / cambio de uso de suelo | Plantas | Península de Yucatán | Yucatán | tropical |
| Moreno, CE; Arita, HT; Solis, L | 2006 | Morphological assembly mechanisms in neotropical bat assemblages and ensembles within a landscape | OECOLOGIA | 149 | 133 | 140 | Modificación / cambio de uso de suelo | Mamíferos | Veracruz | Veracruz | tropical |
| Estrada, A; Coates-Estrada, R; Meritt, D; Montiel, S; Curiel, D | 1993 | Patterns of frugivore species richness and abundance in forest islands and agricultural habitats at Los Tuxtlas, México | VEGETATIO | 108 | 245 | 257 | Modificación / cambio de uso de suelo | Aves y mamíferos | Los Tuxtlas | Veracruz | tropical |
| Carbo-Ramirez, P; Zuria, I | 2011 | The value of small urban greenspaces for birds in a Mexican city | LANDSCAPE AND URBAN PLANNING | 100 | 213 | 222 | Ecología urbana | Aves | Hidalgo | Hidalgo | urbano |
| Fuentes-Montemayor, E; Cuaron, AD; Vazquez-Dominguez, E; Benitez-Malvido, J; Valenzuela-Galvan, D; Andresen, Ellen | 2009 | Living on the edge: roads and edge effects on small mammal populations | JOURNAL OF ANIMAL ECOLOGY | 78 | 857 | 865 | Efecto de borde | Mamíferos | Isla Cozumel | Quintana Roo | tropical |
| Zambrano, L; Contreras, V; Mazari-Hiriart, M; Zarco-Arista, AE | 2009 | Spatial Heterogeneity of Water Quality in a Highly Degraded Tropical Freshwater Ecosystem | ENVIRONMENTAL MANAGEMENT | 43 | 249 | 263 | Servicios ecosistémicos | N/A | Xochimilco | Estado de México | tropical |
| Monroy-Vilchis, O; Rodriguez-Soto, C; Zarco-Gonzalez, M; Urios, V | 2009 | Cougar and jaguar habitat use and activity patterns in central Mexico | ANIMAL BIOLOGY | 59 | 145 | 157 | Uso de hábitat | Mamíferos | Sierra Nanchititla (Michoacán y Guerrero) | Varios | montaña |
| Newton, AC.; Cayuela, L; Echeverria, C; Armesto, JJ; Del Castillo, RF; Golicher, D; Geneletti, D; Gonzalez-Espinosa, M; Huth, A; Lopez-Barrera, F; Malizia, L; Manson, R; Premoli, A; Ramirez-Marcial, N; Benayas, JMR; Rueger, N; Smith-Ramirez, C; Williams-Linera, G | 2009 | Toward Integrated Analysis of Human Impacts on Forest Biodiversity: Lessons from Latin America | ECOLOGY AND SOCIETY | 14 |  |  | Modificación / cambio de uso de suelo | N/A | México y otros países | Varios | varios |
| Garcia-Frapolli, E; Ayala-Orozco, B; Bonilla-Moheno, M; Espadas-Manrique, C; Ramos-Fernandez, G | 2007 | Biodiversity conservation, traditional agriculture and ecotourism: Land cover/land use change projections for a natural protected area in the northeastern Yucatan Peninsula, Mexico | LANDSCAPE AND URBAN PLANNING | 83 | 137 | 153 | Conservación y manejo | N/A | Península de Yucatán | Yucatán | tropical |
| Soto-Pinto, L; Villalvazo-Lopez, V; Jimenez-Ferrer, G; Ramirez-Marcial, N; Montoya, G; Sinclair, FL | 2007 | The role of local knowledge in determining shade composition of multistrata coffee systems in Chiapas, Mexico | BIODIVERSITY AND CONSERVATION | 16 | 419 | 436 | Agroecosistemas | N/A | Región montañosa del norte de Chiapas | Chiapas | montaña |
| Stoner, KE | 2005 | Phyllostomid bat community structure and abundance in two contrasting tropical dry forests | BIOTROPICA | 37 | 591 | 599 | Distribución | Mamíferos | Jalisco y Colima | Varios | tropical |
| Soberon, J; Rodriguez, P; Vazquez-Dominguez, E | 2000 | Implications of the hierarchical structure of biodiversity for the development of ecological indicators of sustainable use | AMBIO | 29 | 136 | 142 | Conservación y manejo | N/A | México y otros países | Quintana Roo | tropical |
| Sanchez-Rojas, G; Gallina, S | 2000 | Mule deer (Odocoileus hemionus) density in a landscape element of the Chihuahuan Desert, Mexico | JOURNAL OF ARID ENVIRONMENTS | 44 | 357 | 368 | Distribución | Mamíferos | Desierto Chihuahuense | Varios | árido |
| Chaves, OM; Stoner, KE; Arroyo-Rodriguez, V | 2012 | Differences in Diet Between Spider Monkey Groups Living in Forest Fragments and Continuous Forest in Mexico | BIOTROPICA | 44 | 105 | 113 | Fragmentación | Mamíferos | Lacandona | Chiapas | tropical |
| Guevara, S; Laborde, J; Sanchez-Rios, G | 2005 | The trees the forest left behind | INTERCIENCIA | 30 | 595 | + | Árboles aislados | Plantas | Los Tuxtlas | Veracruz | tropical |
| Melo, FPL; Arroyo-Rodriguez, V; Fahrig, L; Martinez-Ramos, Ml; Tabarelli, M | 2013 | On the hope for biodiversity-friendly tropical landscapes | TRENDS IN ECOLOGY & EVOLUTION | 28 | 462 | 468 | Conservación y manejo | N/A | N/A | N/A | N/A |
| Hernandez-Stefanoni, LJ; Manuel Dupuy, J; Tun-Dzul, F; May-Pat, F | 2011 | Influence of landscape structure and stand age on species density and biomass of a tropical dry forest across spatial scales | LANDSCAPE ECOLOGY | 26 | 355 | 370 | Modificación / cambio de uso de suelo | Plantas | Península de Yucatán | Yucatán | tropical |
| Howe, HF; Urincho-Pantaleon, Y; de la Pena-Domene, M; Martinez-Garza, C | 2010 | Early seed fall and seedling emergence: precursors to tropical restoration | OECOLOGIA | 164 | 731 | 740 | Restauración - Sucesión ecológica | Plantas | Los Tuxtlas | Veracruz | tropical |
| Ruiz-Guerra, B; Guevara, R; Mariano, NA; Dirzo, R | 2010 | Insect herbivory declines with forest fragmentation and covaries with plant regeneration mode: evidence from a Mexican tropical rain forest | OIKOS | 119 | 317 | 325 | Fragmentación | Invertebrados | Los Tuxtlas | Veracruz | tropical |
| Martinez-Garza, C; Flores-Palacios, A; De La Pena-Domene, M; Howe, HF | 2009 | Seed rain in a tropical agricultural landscape | JOURNAL OF TROPICAL ECOLOGY | 25 | 541 | 550 | Agroecosistemas | Plantas | Los Tuxtlas | Veracruz | tropical |
| Garcia-Frapolli, E; Ramos-Fernandez, G; Galicia, E; Serrano, A | 2009 | The complex reality of biodiversity conservation through Natural Protected Area policy: Three cases from the Yucatan Peninsula, Mexico | LAND USE POLICY | 26 | 715 | 722 | Conservación y manejo | N/A | Península de Yucatán | Yucatán | tropical |
| Monterrubio-Rico, TC; Ortega-Rodriguez, MJ; Marin-Togo, CM.; Salinas-Melgoza, A; Renton, K | 2009 | Nesting Habitat of the Lilac-crowned Parrot in a Modified Landscape in Mexico | BIOTROPICA | 41 | 361 | 368 | Modificación / cambio de uso de suelo | Aves | Michoacán y Jalisco | Varios | Costero |
| Andresen, E | 2008 | Dung beetle assemblages in primary forest and disturbed habitats in a tropical dry forest landscape in Western Mexico | JOURNAL OF INSECT CONSERVATION | 12 | 639 | 650 | Modificación / cambio de uso de suelo | Invertebrados | Oeste de México | Jalisco | tropical |
| Velazquez, A; Bocco, G; Romero, FJ; Vega, AP | 2003 | A landscape perspective on biodiversity conservation - The case of Central Mexico | MOUNTAIN RESEARCH AND DEVELOPMENT | 23 | 240 | 246 | Conservación y manejo | Varios | Centro de México | Varios | montaña |
| Velaquez, A; Bocco, G; Torres, A | 2001 | Turning scientific approaches into practical conservation actions: The case of Comunidad Indigena de Nuevo San Juan Parangaricutiro, Mexico | ENVIRONMENTAL MANAGEMENT | 27 | 655 | 665 | Conservación y manejo | N/A | Nuevo San Juan Parangaricutiro | Michoacán | Montaña |
| Lopez-Blanco, J; Villers-Ruiz, L | 1995 | Delineating boundaries of environmental units for land management using geomorphological approach and GIS - A study in Baja-California, México | REMOTE SENSING OF ENVIRONMENT | 53 | 109 | 117 | Distribución | N/A | Península Baja California | Baja California | semiárido |
| Rojas-Soto, OR; Sosa, V; Francisco Ornelas, J | 2012 | Forecasting cloud forest in eastern and southern Mexico: conservation insights under future climate change scenarios | BIODIVERSITY AND CONSERVATION | 21 | ### | ### | Cambio climático | Varios | México (País) | Varios | mesófilo |
| MacGregor-Fors, I | 2010 | How to measure the urban-wildland ecotone: redefining 'peri-urban' areas | ECOLOGICAL RESEARCH | 25 | 883 | 887 | Ecología urbana | Aves | Morelia | Michoacán | urbano |
| Lopez-Flores, V; MacGregor-Fors, I; Schondube, JE | 2009 | Artificial nest predation along a Neotropical urban gradient | LANDSCAPE AND URBAN PLANNING | 92 | 90 | 95 | Ecología urbana | Aves | Morelia | Michoacán | urbano |
| Avila-Cabadilla, LD; Stoner, KE; Henry, M; Alvarez-Anorve, MY | 2009 | Composition, structure and diversity of phyllostomid bat assemblages in different successional stages of a tropical dry forest | FOREST ECOLOGY AND MANAGEMENT | 258 | 986 | 996 | Restauración - Sucesión ecológica | Mamíferos | Chamela - Cuixmala | Jalisco | tropical |
| Gallardo-Cruz, JA; Perez-Garcia, EA; Meave, JA | 2009 | beta-Diversity and vegetation structure as influenced by slope aspect and altitude in a seasonally dry tropical landscape | LANDSCAPE ECOLOGY | 24 | 473 | 482 | Distribución | Plantas | Nizanda | Oaxaca | tropical |
| Laborde, J; Guevara, S; Sanchez-Rios, G | 2008 | Tree and shrub seed dispersal in pastures: The importance of rainforest trees outside forest fragments | ECOSCIENCE | 15 | 6 | 16 | Árboles aislados | Plantas | Los Tuxtlas | Veracruz | tropical |
| Hernandez-Stefanoni, JL; Dupuy, JM | 2007 | Mapping species density of trees, shrubs and vines in a tropical forest, using field measurements, satellite multiespectral imagery and spatial interpolation | BIODIVERSITY AND CONSERVATION | 16 | ### | ### | Distribución | Plantas | Península de Yucatán | Quintana Roo | tropical |
| Pulido, MT; Caballero, J | 2006 | The impact of shifting agriculture on the availability of non-timber forest products: the example of Sabal yapa in the Maya lowlands of Mexico | FOREST ECOLOGY AND MANAGEMENT | 222 | 399 | 409 | Conservación y manejo | N/A | México y otros países | Quintana Roo | tropical |
| Munoz, D; Estrada, A; Naranjo, E; Ochoa, S | 2006 | Foraging ecology of howler monkeys in a cacao (Theobroma cacao) plantation in Comalcalco, Mexico | AMERICAN JOURNAL OF PRIMATOLOGY | 68 | 127 | 142 | Agroecosistemas | Mamíferos | Comalcalco | Tabasco | tropical |
| Hernandez-Stefanoni, JL | 2005 | Relationships between landscape patterns and species richness of trees, shrubs and vines in a tropical forest | PLANT ECOLOGY | 179 | 53 | 65 | Modificación / cambio de uso de suelo | Plantas | Península de Yucatán | Quintana Roo | tropical |
| Jackson, LE.; Pulleman, MM; Brussaard, L; Bawa, KS; Brown, GG; Cardoso, IM; de Ruiter, PC; Garcia-Barrios, L; Hollander, AD; Lavelle, P; Ouedraogo, E; Pascual, U; Setty, S; Smukler, SM; Tscharntke, T; Van Noordwijk, M | 2012 | Social-ecological and regional adaptation of agrobiodiversity management across a global set of research regions | GLOBAL ENVIRONMENTAL CHANGE-HUMAN AND POLICY DIMENSIONS | 22 | 623 | 639 | Agroecosistemas | N/A | México y otros países | Varios | varios |
| Quijas, S; Jackson, LE; Maass, M; Schmid, B; Raffaelli, D; Balvanera, P | 2012 | Plant diversity and generation of ecosystem services at the landscape scale: expert knowledge assessment | JOURNAL OF APPLIED ECOLOGY | 49 | 929 | 940 | Servicios ecosistémicos | N/A | N/A | N/A | N/A |
| Rosas, F; Quesada, M; Lobo, JA; Sork, VL | 2011 | Effects of habitat fragmentation on pollen flow and genetic diversity of the endangered tropical tree Swietenia humilis (Meliaceae) | BIOLOGICAL CONSERVATION | 144 | ### | ### | Fragmentación | Plantas | Chamela - Cuixmala | Jalisco | tropical |
| Zimmermann, Y; Schorkopf, DLP; Moritz, RFA; Pemberton, RW; Quezada-Euan, JJG; Eltz, T | 2011 | Population genetic structure of orchid bees (Euglossini) in anthropogenically altered landscapes | CONSERVATION GENETICS | 12 | ### | ### | Modificación / cambio de uso de suelo | Invertebrados | Península de Yucatán | Varios | tropical |
| Leyequien, E; de Boer, WF; Toledo, VM | 2010 | Bird Community Composition in a Shaded Coffee Agro-ecological Matrix in Puebla, Mexico: The Effects of Landscape Heterogeneity at Multiple Spatial Scales | BIOTROPICA | 42 | 236 | 245 | Agroecosistemas | Aves | Puebla | Puebla | varios |
| Ochoa-Gaona, S; Hernandez-Vazquez, F; De Jong, BHJ; Gurri-Garcia, FD | 2007 | Loss of floristic diversity over an intensification gradient of the slash-and-burn agricultural system: a case study in the Selva Lacandona region, Chiapas, Mexico | BOLETIN DE LA SOCIEDAD BOTANICA DE MEXICO | 81 | 65 | 80 | Conservación y manejo | Plantas | Lacandona | Chiapas | tropical |
| Porter-Bolland, L; Ellis, EA; Gholz, HL | 2007 | Land use dynamics and landscape history in La Montana, Campeche, Mexico | LANDSCAPE AND URBAN PLANNING | 82 | 198 | 207 | Modificación / cambio de uso de suelo | N/A | Calakmul | Campeche | tropical |
| Lopez-Barrera, F; Manson, RH; Gonzalez-Espinosa, M; Newton, AC | 2007 | Effects of varying forest edge permeability on seed dispersal in a neotropical montane forest | LANDSCAPE ECOLOGY | 22 | 189 | 203 | Efecto de borde | Plantas | Los Altos de Chiapas | Chiapas | montaña |
| Garcia-Estrada, C; Damon, A; Sanchez Hernandez, C; Soto-Pinto, L; Ibarra-Nunez, G | 2006 | Bat diversity in montane rainforest and shaded coffee under different management regimes in southeastern Chiapas, Mexico | BIOLOGICAL CONSERVATION | 132 | 351 | 361 | Agroecosistemas | Mamíferos | Motozintla y Tapachula | Chiapas | mesófilo |
| Scott-Morales, L; Estrada, E; Chavez-Ramirez, F; Cotera, M | 2004 | Continued decline in geographic distribution of the Mexican prairie dog (Cynomys mexicanus) | JOURNAL OF MAMMALOGY | 85 | ### | ### | Distribución | Mamíferos | Desierto Chihuahuense | Varios | semiárido |
| Quintana-Ascencio, PF; Ramirez-Marcial, N; Gonzalez-Espinosa, M; Martinez-Ico, M | 2004 | Sapling survival and growth of coniferous and broad-leaved trees in successional highland habitats in Mexico | APPLIED VEGETATION SCIENCE | 7 | 81 | 88 | Restauración - Sucesión ecológica | Plantas | Estación biológica Huitepec | Chiapas | montaña |
| Vega, E; Montana, C | 2004 | Spatio-temporal variation in the demography of a bunch grass in a patchy semiarid environment | PLANT ECOLOGY | 175 | 107 | 120 | Uso de hábitat | Plantas | Desierto Chihuahuense | Durango | semiárido |
| Estrada, A; Raboy, BE; Oliveira, LC | 2012 | Agroecosystems and Primate Conservation in The Tropics: A Review | AMERICAN JOURNAL OF PRIMATOLOGY | 74 | 696 | 711 | Agroecosistemas | Mamíferos | México y otros países | N/A | tropical |
| Arroyo-Rodriguez, V; Cavender-Bares, J; Escobar, F; Melo, FPL; Tabarelli, M; Santos, BA | 2012 | Maintenance of tree phylogenetic diversity in a highly fragmented rain forest | JOURNAL OF ECOLOGY | 100 | 702 | 711 | Fragmentación | Plantas | Los Tuxtlas | Veracruz | tropical |
| Manuel Dupuy, J; Hernandez-Stefanoni, JL; Hernandez-Juarez, RA; Tetetla-Rangel, E; Lopez-Martinez, JO; Leyequien-Abarca, E; Tun-Dzul, FJ; May-Pat, F | 2012 | Patterns and Correlates of Tropical Dry Forest Structure and Composition in a Highly Replicated Chronosequence in Yucatan, Mexico | BIOTROPICA | 44 | 151 | 162 | Restauración - Sucesión ecológica | Plantas | Península de Yucatán | Varios | tropical |
| Luis Hernandez-Stefanoni, J.; Alberto Gallardo-Cruz, J.; Meave, Jorge A.; Manuel Dupuy, Juan | 2011 | Combining geostatistical models and remotely sensed data to improve tropical tree richness mapping | ECOLOGICAL INDICATORS | 11 | ### | ### | Distribución | Plantas | Península de Yucatán | Varios | tropical |
| Colchero, F.; Conde, D. A.; Manterola, C.; Chavez, C.; Rivera, A.; Ceballos, G. | 2011 | Jaguars on the move: modeling movement to mitigate fragmentation from road expansion in the Mayan Forest | ANIMAL CONSERVATION | 14 | 158 | 166 | Conectividad | Mamíferos | México y otros países | Varios | tropical |
| Mas, Jean-Francois; Gao, Yan; Navarrete Pacheco, Jose Antonio | 2010 | Sensitivity of landscape pattern metrics to classification approaches | FOREST ECOLOGY AND MANAGEMENT | 259 | ### | ### | Métodos de análisis | N/A | Michoacán | Michoacán | varios |
| Patten, Michael A.; Gomez de Silva, Hector; Smith-Patten, Brenda D. | 2010 | Long-term changes in the bird community of Palenque, Chiapas, in response to rainforest loss | BIODIVERSITY AND CONSERVATION | 19 | 21 | 36 | Modificación / cambio de uso de suelo | Aves | Palenque | Chiapas | tropical |
| Figueroa-Esquivel, E.; Puebla-Olivares, F.; Godinez-Alvarez, H.; Nunez-Farfan, J. | 2009 | Seed dispersal effectiveness by understory birds on Dendropanax arboreus in a fragmented landscape | BIODIVERSITY AND CONSERVATION | 18 | ### | ### | Árboles aislados | Aves | Los Tuxtlas | Veracruz | tropical |
| Rivera-Aguilar, V.; Godinez-Alvarez, H.; Moreno-Torres, R.; Rodriguez-Zaragoza, S. | 2009 | Soil physico-chemical properties affecting the distribution of biological soil crusts along an environmental transect at Zapotitlan drylands, Mexico | JOURNAL OF ARID ENVIRONMENTS | 73 | ### | ### | Distribución | Varios | Tehuacán-Cuicatlán-Zapotitlán | Puebla | semiárido |
| Tejeda-Cruz, Carlos; Naranjo, Eduardo J.; Cuaron, Alfredo D.; Perales, Hugo; Cruz-Burguete, Jorge L. | 2009 | Habitat use of wild ungulates in fragmented landscapes of the Lacandon Forest, Southern Mexico | MAMMALIA | 73 | 211 | 219 | Uso de hábitat | Mamíferos | Lacandona | Chiapas | tropical |
| Mandujano, Salvador; Escobedo-Morales, Luis A. | 2008 | Population viability analysis of howler monkeys (Alouatta palliata mexicana) in a highly fragmented landscape in Los Tuxtlas, Mexico | TROPICAL CONSERVATION SCIENCE | 1 | 43 | 62 | Fragmentación | Mamíferos | Los Tuxtlas | Veracruz | tropical |
| Rodriguez-Estrella, Ricardo | 2007 | Land use changes affect distributional patterns of desert birds in the Baja California peninsula, Mexico | DIVERSITY AND DISTRIBUTIONS | 13 | 877 | 889 | Modificación / cambio de uso de suelo | Aves | Baja california | Varios | semiárido |
| Galicia, Leopoldo; Garcia-Romero, Arturo | 2007 | Land use and land cover change in highland temperate forests in the Izta-Popo National Park, central Mexico | MOUNTAIN RESEARCH AND DEVELOPMENT | 27 | 48 | 57 | Modificación / cambio de uso de suelo | N/A | Izta-Popo, centro de México (Estado de México, Morelos, Puebla) | Varios | Montaña |
| Castro-Luna, Alejandro A.; Sosa, Vinicio J.; Castillo-Campos, Gonzalo | 2007 | Quantifying phyllostomid bats at different taxonomic levels as ecological indicators in a disturbed tropical forest | ACTA CHIROPTEROLOGICA | 9 | 219 | 228 | Modificación / cambio de uso de suelo | Mamíferos | Parque Agua Blanca | Tabasco | tropical |
| Delgado, JA; Shaffer, M; Hu, CGS; Lavado, RS; Wong, JC; Joosse, P; Li, XX; Rimski-Korsakov, H; Follett, R; Colon, W; Sotomayor, D | 2006 | A decade of change in nutrient management: A new nitrogen index | JOURNAL OF SOIL AND WATER CONSERVATION | 61 | 62A | 71A | Ecología ecosistémica | N/A | N/A | N/A | N/A |
| Garcia-Romero, A; Oropeza-Orozco, O; Galicia-Sarmiento, L | 2004 | Land-use systems and resilience of tropical rain forests in the Tehuantepec Isthmus, Mexico | ENVIRONMENTAL MANAGEMENT | 34 | 768 | 785 | Modificación / cambio de uso de suelo | N/A | Istmo de Tehuantepec | Oaxaca | tropical |
| Bonilla-Moheno, Martha; Redo, Daniel J.; Aide, T. Mitchell; Clark, Matthew L.; Ricardo Grau, H. | 2013 | Vegetation change and land tenure in Mexico: A country-wide analysis | LAND USE POLICY | 30 | 355 | 364 | Conservación y manejo | N/A | México (País) | Varios | varios |
| Isabel Moreno-Calles, Ana; Casas, Alejandro; Garcia-Frapolli, Eduardo; Torres-Garcia, Ignacio | 2012 | Traditional agroforestry systems of multi-crop milpa and chichipera cactus forest in the arid Tehuacan Valley, Mexico: their management and role in people's subsistence | AGROFORESTRY SYSTEMS | 84 | 207 | 226 | Agroforestería | Plantas | Tehuacán-Cuicatlán-Zapotitlán | Puebla | semiárido |
| Parra-Olea, Gabriela; Carlos Windfield, Juan; Velo-Anton, Guillermo; Zamudio, Kelly R. | 2012 | Isolation in habitat refugia promotes rapid diversification in a montane tropical salamander | JOURNAL OF BIOGEOGRAPHY | 39 | 353 | 370 | Conectividad | Anfibios | Centro de México | Varios | varios |
| Honey-Roses, Jordi; Baylis, Kathy; Isabel Ramirez, M. | 2011 | A Spatially Explicit Estimate of Avoided Forest Loss | CONSERVATION BIOLOGY | 25 | ### | ### | Conservación y manejo | N/A | Centro de México | Varios | Montaña |
| Clara Arteaga, Maria; McCormack, John E.; Eguiarte, Luis E.; Medellin, Rodrigo A. | 2011 | Genetic admixture in multidimensional environmental space: asymmetrical niche similarity promotes gene flow in armadillos (Dasypus novemcinctus) | EVOLUTION | 65 | ### | ### | Genética del paisaje | Mamíferos | México (País) | Varios | varios |
| Perez-Garcia, Eduardo A.; Meave, Jorge A.; Luis Villasenor, Jose; Alberto Gallardo-Cruz, J.; Lebrija-Trejos, Edwin E. | 2010 | Vegetation Heterogeneity and Life-Strategy Diversity in the Flora of the Heterogeneous Landscape of Nizanda, Oaxaca, Mexico | FOLIA GEOBOTANICA | 45 | 143 | 161 | Distribución | Plantas | Nizanda | Oaxaca | tropical |
| Novelo-Gutierrez, Rodolfo; Antonio Gomez-Anaya, Jose | 2009 | A comparative study of Odonata (Insecta) assemblages along an altitudinal gradient in the sierra de Coalcoman Mountains, Michoacan, Mexico | BIODIVERSITY AND CONSERVATION | 18 | 679 | 698 | Distribución | Invertebrados | Coalcomán | Michoacán | tropical |
| Gove, Aaron D.; Majer, Jonathan D.; Rico-Gray, Victor | 2009 | Ant assemblages in isolated trees are more sensitive to species loss and replacement than their woodland counterparts | BASIC AND APPLIED ECOLOGY | 10 | 187 | 195 | Árboles aislados | Invertebrados | La Mancha | Veracruz | tropical |
| Tschakert, Petra; Huber-Sannwald, Elisabeth; Ojima, Dennis S.; Raupach, Michael R.; Schienke, Erich | 2008 | Holistic, adaptive management of the terrestrial carbon cycle at local and regional scales | GLOBAL ENVIRONMENTAL CHANGE-HUMAN AND POLICY DIMENSIONS | 18 | 128 | 141 | Ecología ecosistémica | N/A |  | Chiapas | tropical |
| Pulido, Maria T.; Valverde, Teresa; Caballero, Javier | 2007 | Variation in the population dynamics of the palm Sabal yapa in a landscape shaped by shifting cultivation in the Yucatan Peninsula, Mexico | JOURNAL OF TROPICAL ECOLOGY | 23 | 139 | 149 | Distribución | Plantas | Península de Yucatán | Yucatán | tropical |
| Zuria, Iriana; Gates, J. Edward; Castellanos, Ignacio | 2007 | Artificial nest predation in hedgerows and scrub forest in a human-dominated landscape of central Mexico | ACTA OECOLOGICA-INTERNATIONAL JOURNAL OF ECOLOGY | 31 | 158 | 167 | Cercas vivas | Aves | Centro de México | Guanajuato | semiárido |
| Deloya, Cuauhtemoc; Parra-Tabla, Victor; Delfin-Gonzalez, Hugo | 2007 | Fauna of Scarabaeidae-laparosticti and Trogidae (Coleoptera : Scarabaeoidea) associated with cloud forest, shaded coffee plantations and transformed communities in Central Veracruz, Mexico | NEOTROPICAL ENTOMOLOGY | 36 | 5 | 21 | Agroecosistemas | Invertebrados | Veracruz | Veracruz | mesófilo |
| Berlanga-Robles, C. A.; Ruiz-Luna, A. | 2006 | Assessment of landscape changes and their effects on the San Blas estuarine system, Nayarit (Mexico), through Landsat imagery analysis | CIENCIAS MARINAS | 32 | 523 | 538 | Modificación / cambio de uso de suelo | N/A | San Blas | Nayarit | tropical |
| Hidalgo-Mihart, MG; Cantu-Salazar, L; Gonzalez-Romero, A; Lopez-Gonzalez, CA | 2004 | Historical and present distribution of coyote (Canis latrans) in Mexico and Central America | JOURNAL OF BIOGEOGRAPHY | 31 | ### | ### | Distribución | Mamíferos | México (País) | Varios | varios |
| Huerta-Martinez, FM; Garcia-Moya, E | 2004 | Perennial species diversity and its relation with the environment in a semiarid area of central Mexico: Implications for conservation | INTERCIENCIA | 29 | 435 | + | Distribución | Plantas | Centro de México | San Luis Potosí | semiárido |
| Halvorson, WL; Castellanos, AE; Murrieta-Saldivar, J | 2003 | Sustainable land use requires attention to ecological signals | ENVIRONMENTAL MANAGEMENT | 32 | 551 | 558 | Conservación y manejo | N/A | La Costa de Hermosillo | Sonora | N/A |
| García-Oliva, F; Lugo, RM; Mass, JM | 1995 | Soil CS-137 activity in a tropical deciduous ecosystem under pasture conversion in México | JOURNAL OF ENVIRONMENTAL RADIOACTIVITY | 26 | 37 | 49 | Modificación / cambio de uso de suelo | N/A | Chamela - Cuixmala | Jalisco | tropical |
| Colditz, Rene R.; Lopez Saldana, Gerardo; Maeda, Pedro; Argumedo Espinoza, Jesus; Meneses Tovar, Carmen; Victoria Hernandez, Arturo; Zermeno Benitez, Carlos; Cruz Lopez, Isabel; Ressl, Rainer | 2012 | Generation and analysis of the 2005 land cover map for Mexico using 250 m MODIS data | REMOTE SENSING OF ENVIRONMENT | 123 | 541 | 552 | Métodos de análisis | N/A | México (País) | Varios | varios |
| Dalle, Sarah Paule; Pulido, Maria T.; de Blois, Sylvie | 2011 | Balancing shifting cultivation and forest conservation: lessons from a sustainable landscape in southeastern Mexico | ECOLOGICAL APPLICATIONS | 21 | ### | ### | Agroforestería | N/A | Sureste de México | Quintana Roo | tropical |
| Figueroa, Fernanda; Sanchez-Cordero, Victor; Meave, Jorge A.; Trejo, Irma | 2009 | Socioeconomic context of land use and land cover change in Mexican biosphere reserves | ENVIRONMENTAL CONSERVATION | 36 | 180 | 191 | Modificación / cambio de uso de suelo | N/A | México (País) | Varios | varios |
| Ortiz-Pulido, Raul; Vargas-Licona, Guadalupe | 2008 | Exploring the relationship between hummingbird records and flower abundance with spatio-temporal scaling | ORNITOLOGIA NEOTROPICAL | 19 | 473 | 483 | Distribución | Aves | Pachuca | Hidalgo | urbano |
| List, Rurik; Ceballos, Gerardo; Curtin, Charles; Gogan, Peter J. P.; Pacheco, Jesus; Truett, Joe | 2007 | Historic distribution and challenges to bison recovery in the northern Chihuahuan Desert | CONSERVATION BIOLOGY | 21 | ### | ### | Distribución | Mamíferos | Desierto Chihuahuense | Varios | árido |
| Cuartas-Hernandez, Sandra; Nunez-Farfan, Juan | 2006 | The genetic structure of the tropical understory herb Dieffenbachia seguine L. before and after forest fragmentation | EVOLUTIONARY ECOLOGY RESEARCH | 8 | ### | ### | Genética del paisaje | Plantas | Los Tuxtlas | Veracruz | tropical |
| Zuria, I; Gates, JE | 2006 | Vegetated field margins in Mexico: Their history, structure and function, and management | HUMAN ECOLOGY | 34 | 53 | 77 | Cercas vivas | Plantas | Centro de México | Guanajuato | semiárido |
| Santos-Barrera, Georgina; Nicolas Urbina-Cardona, J. | 2011 | The role of the matrix-edge dynamics of amphibian conservation in tropical montane fragmented landscapes | REVISTA MEXICANA DE BIODIVERSIDAD | 82 | 679 | 687 | Efecto de borde | Anfibios | Atoyac de Alvarez | Guerrero | tropical |
| MacGregor-Fors, Ian; Blanco-Garcia, Arnulfo; Lindig-Cisneros, Roberto | 2010 | Bird community shifts related to different forest restoration efforts: A case study from a managed habitat matrix in Mexico | ECOLOGICAL ENGINEERING | 36 | ### | ### | Restauración - Sucesión ecológica | Aves | Nuevo San Juan Parangaricutiro | Michoacán | Montaña |
| Meneses Calvillo, Laura; Melendez Ramirez, Virginia; Parra-Tabla, Victor; Navarro, Jorge | 2010 | Bee diversity in a fragmented landscape of the Mexican neotropic | JOURNAL OF INSECT CONSERVATION | 14 | 323 | 334 | Fragmentación | Invertebrados | Yalsihon | Yucatán | tropical |
| Castellanos, Thelma; Dohrmann, Anja B.; Imfeld, Gwenael; Baumgarte, Susanne; Tebbe, Christoph C. | 2009 | Search of environmental descriptors to explain the variability of the bacterial diversity from maize rhizospheres across a regional scale | EUROPEAN JOURNAL OF SOIL BIOLOGY | 45 | 383 | 393 | Modificación / cambio de uso de suelo | Hongos y Bacterias | Valle de Santo Domingo | Baja california | semiárido |
| Marin, Linda; Leon-Cortes, Jorge L.; Stefanescu, Constanti | 2009 | The effect of an agro-pasture landscape on diversity and migration patterns of frugivorous butterflies in Chiapas, Mexico | BIODIVERSITY AND CONSERVATION | 18 | 919 | 934 | Agroecosistemas | Invertebrados | Chiapas | Chiapas | tropical |
| Caballero, Ubaldo; Leon-Cortes, Jorge L.; Moron-Rios, Alejandro | 2009 | Response of rove beetles (Staphylinidae) to various habitat types and change in Southern Mexico | JOURNAL OF INSECT CONSERVATION | 13 | 67 | 75 | Modificación / cambio de uso de suelo | Invertebrados | Sureste de México | Chiapas | tropical |
| Arizmendi, Ma. D. C.; Davila, P.; Estrada, A.; Figueroa, E.; Marquez-Valdelamar, L.; Lira, R.; Oliveros-Galindo, O.; Valiente-Banuet, A. | 2008 | Riparian Mesquite bushes are important for bird conservation in tropical and Mexico | JOURNAL OF ARID ENVIRONMENTS | 72 | ### | ### | Uso de hábitat | Aves | Valle Tehuacán-Cuicatlán | Puebla | tropical |
| Perez, Azucena; Mas, Jean Franois; Velazquez, Alejandro; Vazquez, Lorenzo | 2008 | Modelling vegetation diversity types in Mexico based upon topographic features | INTERCIENCIA | 33 | 88 | 95 | Métodos de análisis | Plantas | México (País) | Varios | varios |
| Gonzalez-Oreja, Jose Antonio; Bonache Regidor, Carolina; Buzo Franco, Daniela; Diaz Ordaz, Arturo Andres De La Fuente; Hernandez Satin, Lorna | 2007 | Ecological characterization of the avifauna of the urban parks of the City of Puebla (Mexico) | ARDEOLA | 54 | 53 | 67 | Ecología urbana | Aves | Puebla | Puebla | urbano |
| Riojas-Lopez, ME; Mellink, E | 2005 | Potential for biological conservation in man-modified semiarid habitats in northeastern Jalisco, Mexico | BIODIVERSITY AND CONSERVATION | 14 | ### | ### | Modificación / cambio de uso de suelo | N/A | Llanos de ojuelos | Jalisco | semiárido |
| Sanchez-Rojas, G; Gallina, S | 2000 | Factors affecting habitat use by mule deer (Odocoileus hemionus) in the central part of the Chihuahuan Desert, Mexico: an assessment with univariate and multivariate methods | ETHOLOGY ECOLOGY & EVOLUTION | 12 | 405 | 417 | Uso de hábitat | Mamíferos | Desierto Chihuahuense | Durango | árido |
| Rodelo-Urrego, M.; Pagan, I.; Gonzalez-Jara, P.; Betancourt, M.; Moreno-Letelier, A.; Ayllon, M. A.; Fraile, A.; Pinero, D.; Garcia-Arenal, F. | 2013 | Landscape heterogeneity shapes host-parasite interactions and results in apparent plantvirus codivergence | MOLECULAR ECOLOGY | 22 | ### | ### | Medicina de la conservación | Plantas | México (País) | Varios | varios |
| Cruz-Cardenas, Gustavo; Luis Villasenor, Jose; Lopez-Mata, Lauro; Ortiz, Enrique | 2012 | Potential distribution of humid mountain forest in México | BOTANICAL SCIENCES | 90 | 331 | 340 | Distribución | Plantas | México (País) | Varios | mesófilo |
| Roes, Matthias; Escobar, Federico; Halffter, Gonzalo | 2012 | How dung beetles respond to a human-modified variegated landscape in Mexican cloud forest: a study of biodiversity integrating ecological and biogeographical perspectives | DIVERSITY AND DISTRIBUTIONS | 18 | 377 | 389 | Modificación / cambio de uso de suelo | Invertebrados | Montaña Sierra Norte | Puebla | mesófilo |
| Magali Bonilla-Sanchez, Yadira; Carlos Serio-Silva, Juan; Pozo-Montuy, Gilberto; Chapman, Colin A. | 2012 | Howlers Are Able to Survive in Eucalyptus Plantations Where Remnant and Regenerating Vegetation Is Available | INTERNATIONAL JOURNAL OF PRIMATOLOGY | 33 | 233 | 245 | Uso de hábitat | Mamíferos | Balancán | Tabasco | tropical |
| MacGregor-Fors, Ian; Schondube, Jorge E. | 2011 | Use of Tropical Dry Forests and Agricultural Areas by Neotropical Bird Communities | BIOTROPICA | 43 | 365 | 370 | Uso de hábitat | Aves | Costa del Pacífico de Jalisco | Jalisco | tropical |
| MacGregor-Fors, Ian; Morales-Perez, Lorena; Schondube, Jorge E. | 2010 | Migrating to the city: Responses of neotropical migrant bird communities to urbanization | CONDOR | 112 | 711 | 717 | Ecología urbana | Aves | Cuitzeo | Michoacán | urbano |
| Avila-Flores, Rafael; Boyce, Mark S.; Boutin, Stan | 2010 | Habitat Selection by Prairie Dogs in a Disturbed Landscape at the Edge of Their Geographic Range | JOURNAL OF WILDLIFE MANAGEMENT | 74 | 945 | 953 | Modificación / cambio de uso de suelo | Mamíferos | Chihuahua | Chihuahua | árido |
| Saldana-Vazquez, Romeo A.; Sosa, Vinicio J.; Hernandez-Montero, Jesus R.; Lopez-Barrera, Fabiola | 2010 | Abundance responses of frugivorous bats (Stenodermatinae) to coffee cultivation and selective logging practices in mountainous central Veracruz, Mexico | BIODIVERSITY AND CONSERVATION | 19 | ### | ### | Agroecosistemas | Mamíferos | Xalapa | Veracruz | mesófilo |
| Valdespino, Carolina; Rico-Hernandez, Guillermo; Mandujano, Salvador | 2010 | Gastrointestinal Parasites of Howler Monkeys (Alouatta palliata) Inhabiting the Fragmented Landscape of the Santa Marta Mountain Range, Veracruz, Mexico | AMERICAN JOURNAL OF PRIMATOLOGY | 72 | 539 | 548 | Medicina de la conservación | Mamíferos | Los Tuxtlas | Veracruz | tropical |
| Bonilla-Sanchez, Yadira M.; Carlos Serio-Silva, Juan; Pozo-Montuy, Gilberto; Bynum, Nora | 2010 | Population status and identification of potential habitats for the conservation of the Endangered black howler monkey Alouatta pigra in northern Chiapas, Mexico | ORYX | 44 | 293 | 299 | Uso de hábitat | Mamíferos | Playas de Catazajá | Chiapas | tropical |
| Pozo-Montuy, Gilberto; Carlos Serio-Silva, Juan; Bonilla-Sanchez, Yadira M.; Bynum, Nora; Landgrave, Rosario | 2008 | Current Status of the Habitat and Population of the Black Howler Monkey (Alouatta pigra) in Balancan, Tabasco, Mexico | AMERICAN JOURNAL OF PRIMATOLOGY | 70 | ### | ### | Uso de hábitat | Mamíferos | Balancán | Tabasco | tropical |
| Guevara, Sergio; Laborde, Javier | 2008 | The Landscape Approach: Designing New Reserves for Protection of Biological and Cultural Diversity in Latin America | ENVIRONMENTAL ETHICS | 30 | 251 | 262 | Diseño de reservas | N/A | México y otros países | N/A | N/A |
| Ojeda-Revah, L.; Bocco, G.; Ezcurra, E.; Espejel, I. | 2008 | Land-cover/use transitions in the binational Tijuana River watershed during a period of rapid industrialization | APPLIED VEGETATION SCIENCE | 11 | 107 | 116 | Modificación / cambio de uso de suelo | N/A | Frontera EUA | Tijuana | semiárido |
| Herrera-Arreola, G.; Herrera, Y.; Reyes-Reyes, B. G.; Dendooven, L. | 2007 | Mesquite (Prosopis juliflora (Sw.) DC.), huisache (Acacia farnesiana (L.) Willd.) and catclaw (Mimosa biuncifera Benth.) and their effect on dynamics of carbon and nitrogen in soils of the semi-arid highlands of Durango Mexico | JOURNAL OF ARID ENVIRONMENTS | 69 | 583 | 598 | Ecología ecosistémica | Plantas | Rodeo | Durango | semiárido |
| Riojas-Lopez, M. E. | 2006 | Rodent communities in two natural and one cultivated nopaleras (Opuntia spp.) in north-eastern Jalisco, Mexico | JOURNAL OF ARID ENVIRONMENTS | 67 | 428 | 435 | Agroecosistemas | Mamíferos | Jalisco | Jalisco | semiárido |
| Hernandez-Trejo, H; Priego-Santander, AG; Lopez-Portillo, JA; Isunza-Vera, E | 2006 | Physical-geographical landscapes of the mangroves of La Mancha lagoon, Veracruz, Mexico | INTERCIENCIA | 31 | 211 | 219 | Distribución | Plantas | Laguna La Mancha | Veracruz | Humedal |
| Velazquez, A; Romero, FJ; Rangel-Cordero, H; Heil, GW | 2001 | Effects of landscape changes on mammalian assemblages at Izta-Popo Volcanoes, Mexico | BIODIVERSITY AND CONSERVATION | 10 | ### | ### | Modificación / cambio de uso de suelo | Mamíferos | Volcanes Izta-Popo | Puebla | Montaña |
| Mitsch, William J.; Hernandez, Maria E. | 2013 | Landscape and climate change threats to wetlands of North and Central America | AQUATIC SCIENCES | 75 | 133 | 149 | Cambio climático | N/A | Norteamérica y Centroamérica | N/A | N/A |
| Mas, Jean-Francois; Perez-Vega, Azucena; Clarke, Keith C. | 2012 | Assessing simulated land use/cover maps using similarity and fragmentation indices | ECOLOGICAL COMPLEXITY | 11 | 38 | 45 | Modificación / cambio de uso de suelo | Plantas | N/A | N/A | N/A |
| Bautista-Cruz, Angelica; del Castillo, Rafael F.; Etchevers-Barra, Jorge D.; del Carmen Gutierrez-Castorena, Ma; Baez, Aurelio | 2012 | Selection and interpretation of soil quality indicators for forest recovery after clearing of a tropical montane cloud forest in Mexico | FOREST ECOLOGY AND MANAGEMENT | 277 | 74 | 80 | Restauración - Sucesión ecológica | N/A | El Rincón | Oaxaca | mesófilo |
| Farley, Kathleen A.; Ojeda-Revah, Lina; Atkinson, Emily E.; Ricardo Eaton-Gonzalez, B. | 2012 | Changes in land use, land tenure, and landscape fragmentation in the Tijuana River Watershed following reform of the ejido sector | LAND USE POLICY | 29 | 187 | 197 | Modificación / cambio de uso de suelo | N/A | Frontera EUA | Tijuana | semiárido |
| Ortega-Alvarez, Ruben; MacGregor-Fors, Ian | 2011 | Dusting-off the file: A review of knowledge on urban ornithology in Latin America | LANDSCAPE AND URBAN PLANNING | 101 | 1 | 10 | Ecología urbana | Aves | México y otros países | N/A | urbano |
| Pozo-Montuy, Gilberto; Carlos Serio-Silva, Juan; Bonilla-Sanchez, Yadira M. | 2011 | Influence of the landscape matrix on the abundance of arboreal primates in fragmented landscapes | PRIMATES | 52 | 139 | 147 | Fragmentación | Mamíferos | Balancán | Tabasco | tropical |
| Cantarello, Elena; Newton, Adrian C.; Hill, Ross A.; Tejedor-Garavito, Natalia; Williams-Linera, Guadalupe; Lopez-Barrera, Fabiola; Manson, Robert H.; Golicher, Duncan J. | 2011 | Simulating the potential for ecological restoration of dryland forests in Mexico under different disturbance regimes | ECOLOGICAL MODELLING | 222 | ### | ### | Restauración - Sucesión ecológica | Plantas | Tablon y centro de Veracruz (Chiapas y Veracruz) | Varios | tropical |
| MacGregor-Fors, Ian; Ortega-Alvarez, Ruben | 2011 | Fading from the forest: Bird community shifts related to urban park site-specific and landscape traits | URBAN FORESTRY & URBAN GREENING | 10 | 239 | 246 | Ecología urbana | Aves | Ciudad de México | Estado de México | urbano |
| Luis Hernandez-Stefanoni, J.; Manuel Dupuy, Juan; Angel Castillo-Santiago, M. | 2009 | Assessing species density and abundance of tropical trees from remotely sensed data and geostatistics | APPLIED VEGETATION SCIENCE | 12 | 398 | 414 | Distribución | Plantas | Península de Yucatán | Quintana Roo | tropical |
| Arellano, Lucrecia; Leon-Cortes, Jorge L.; Halffter, Gonzalo | 2008 | Response of dung beetle assemblages to landscape structure in remnant natural and modified habitats in southern Mexico | INSECT CONSERVATION AND DIVERSITY | 1 | 253 | 262 | Modificación / cambio de uso de suelo | Invertebrados | Vicente Guerrero | Chiapas | tropical |
| Medina-Roldan, Eduardo; Arredondo Moreno, J. Tulio; Garcia Moya, Edmundo; Huerta Martinez, F. Martini | 2007 | Soil water content dynamics along a range condition gradient in a shortgrass steppe | RANGELAND ECOLOGY & MANAGEMENT | 60 | 79 | 87 | Ecología ecosistémica | Plantas | Mesa central | Jalisco | Pastizal |
| Chay-Hernandez, David A.; Delfin-Gonzalez, Hugo; Parra-Tabla, Victor | 2006 | Ichneumonoidea (Hymenoptera) community diversity in an agricultural environment in the state of Yucatan, Mexico | ENVIRONMENTAL ENTOMOLOGY | 35 | ### | ### | Modificación / cambio de uso de suelo | Invertebrados | Península de Yucatán | Yucatán | tropical |
| Leyva, C; Espejel, L; Escofet, A; Bullock, SH | 2006 | Coastal landscape fragmentation by tourism development: Impacts and conservation alternatives | NATURAL AREAS JOURNAL | 26 | 117 | 125 | Conservación y manejo | N/A |  | Varios | semiárido |
| Mendoza, MA; Fajardo, JJ; Zepeta, J | 2005 | Landscape based forest management, a real world case study from Mexico | FOREST ECOLOGY AND MANAGEMENT | 209 | 19 | 26 | Conservación y manejo | Plantas | | Jalisco | tropical |
| Bullock, SH; Martijena, NE; Webb, RH; Turner, RM | 2005 | Twentieth century demographic changes in cirio and cardon in Baja California, Mexico | JOURNAL OF BIOGEOGRAPHY | 32 | 127 | 143 | Modificación / cambio de uso de suelo | Plantas | Desierto de Sonora | Baja California | árido |
| Espejel, I; Fischer, DW; Hinojosa, A; Garcia, C; Leyva, C | 1999 | Land-use planning for the Guadalupe Valley, Baja California, Mexico | LANDSCAPE AND URBAN PLANNING | 45 | 219 | 232 | Conservación y manejo | N/A | Valle de Guadalupe | Baja California | árido |
| Barnes, JM; Trinidad-Correa, R; Orum, TV; Felix-Gastelum, R; Nelson, MR | 1999 | Landscape ecology as a new infrastructure for improved management of plant viruses and their insect vectors in agroecosystems | ECOSYSTEM HEALTH | 5 | 26 | 35 | Medicina de la conservación | Invertebrados | Valle del Fuerte | Sinaloa | semiárido |
| Velo-Anton, G.; Parra, J. L.; Parra-Olea, G.; Zamudio, K. R. | 2013 | Tracking climate change in a dispersal-limited species: reduced spatial and genetic connectivity in a montane salamander | MOLECULAR ECOLOGY | 22 | ### | ### | Conectividad | Anfibios | Centro de México | Varios | varios |
| Cruse-Sanders, Jennifer M.; Parker, Kathleen C.; Friar, Elizabeth A.; Huang, Daisie I.; Mashayekhi, Saeideh; Prince, Linda M.; Otero-Arnaiz, Adriana; Casas, Alejandro | 2013 | Managing diversity: Domestication and gene flow in Stenocereus stellatus Riccob. (Cactaceae) in Mexico | ECOLOGY AND EVOLUTION | 3 | ### | ### | Distribución | Plantas | Puebla y Oaxaca | Varios | árido |
| Lopez-Martinez, J. O.; Hernandez-Stefanoni, J. L.; Dupuy, J. M.; Meave, J. A. | 2013 | Partitioning the variation of woody plant beta-diversity in a landscape of secondary tropical dry forests across spatial scales | JOURNAL OF VEGETATION SCIENCE | 24 | 33 | 45 | Modificación / cambio de uso de suelo | Plantas | Península de Yucatán | Varios | tropical |
| Eakin, Hallie; Benessaiah, Karina; Barrera, Juan F.; Cruz-Bello, Gustavo M.; Morales, Helda | 2012 | Livelihoods and landscapes at the threshold of change: disaster and resilience in a Chiapas coffee community | REGIONAL ENVIRONMENTAL CHANGE | 12 | 475 | 488 | Agroecosistemas | N/A | Chiapas | Chiapas | tropical |
| Martinez-Garza, Cristina; Osorio-Beristain, Marcela; Valenzuela-Galvan, David; Nicolas-Medina, Alondra | 2011 | Intra and inter-annual variation in seed rain in a secondary dry tropical forest excluded from chronic disturbance | FOREST ECOLOGY AND MANAGEMENT | 262 | ### | ### | Modificación / cambio de uso de suelo | Plantas | | Morelos | tropical |
| Urquiza-Haas, T.; Peres, C. A.; Dolman, P. M. | 2011 | Large vertebrate responses to forest cover and hunting pressure in communal landholdings and protected areas of the Yucatan Peninsula, Mexico | ANIMAL CONSERVATION | 14 | 271 | 282 | Modificación / cambio de uso de suelo | Vertebrados | Península de Yucatán | Varios | tropical |
| Fernando Lopez-Arevalo, Hugo; Gallina, Sonia; Landgrave, Rosario; Martinez-Meyer, Enrique; Munoz-Villers, Lyssette E. | 2011 | Local knowledge and species distribution models' contribution towards mammalian conservation | BIOLOGICAL CONSERVATION | 144 | ### | ### | Distribución | Mamíferos | Valle Antigua | Veracruz | mesófilo |
| Suazo-Ortuno, Ireri; Alvarado-Diaz, Javier; Martinez-Ramos, Miguel | 2011 | Riparian Areas and Conservation of Herpetofauna in a Tropical Dry Forest in Western Mexico | BIOTROPICA | 43 | 237 | 245 | Uso de hábitat | Anfibios y reptiles | Chamela - Cuixmala | Jalisco | tropical |
| Suarez-Montes, Pilar; Fornoni, Juan; Nunez-Farfan, Juan | 2011 | Conservation Genetics of the Endemic Mexican Heliconia uxpanapensis in the Los Tuxtlas Tropical Rain Forest | BIOTROPICA | 43 | 114 | 121 | Genética del paisaje | Plantas | Los Tuxtlas | Veracruz | tropical |
| Sanchez-Gallen, Irene; Javier Alvarez-Sanchez, Francisco; Benitez-Malvido, Julieta | 2010 | Structure of the advanced regeneration community in tropical rain forest fragments of Los Tuxtlas, Mexico | BIOLOGICAL CONSERVATION | 143 | ### | ### | Fragmentación | Plantas | Los Tuxtlas | Veracruz | tropical |
| Toledo-Aceves, Tarin; Purata-Velarde, Silvia; Peters, Charles M. | 2009 | Regeneration of commercial tree species in a logged forest in the Selva Maya, Mexico | FOREST ECOLOGY AND MANAGEMENT | 258 | ### | ### | Restauración - Sucesión ecológica | Plantas | Tres Garantías | Quintana Roo | tropical |
| Moreno, Claudia E.; Castillo-Campos, Gonzalo; Verdu, Jose R. | 2009 | Taxonomic diversity as complementary information to assess plant species diversity in secondary vegetation and primary tropical deciduous forest | JOURNAL OF VEGETATION SCIENCE | 20 | 935 | 943 | Restauración - Sucesión ecológica | Plantas | Veracruz | Veracruz | tropical |
| Arroyo-Rodriguez, Victor; Toledo-Aceves, Tarin | 2009 | Impact of landscape spatial pattern on liana communities in tropical rainforests at Los Tuxtlas, Mexico | APPLIED VEGETATION SCIENCE | 12 | 340 | 349 | Modificación / cambio de uso de suelo | Plantas | Los Tuxtlas | Veracruz | tropical |
| Perez-Garcia, Eduardo A.; Sevilha, Anderson C.; Meave, Jorge A.; Scariot, Aldicir | 2009 | Floristic differentiation in limestone outcrops of southern México and central Brazil: A beta diveristy approach | BOLETIN DE LA SOCIEDAD BOTANICA DE MEXICO | 84 | 45 | 58 | Modificación / cambio de uso de suelo | Plantas | Sureste de México | Oaxaca | tropical |
| Arredondo-Leon, Carlos; Munoz-Jimenez, Julio; Garcia-Romero, Arturo | 2008 | Recent changes in landscape-dynamics trends in tropical highlands, central Mexico | INTERCIENCIA | 33 | 569 | 577 | Modificación / cambio de uso de suelo | Plantas | Centro de México | Michoacán | montaña |
| Hernandez-Guzman, Rafael; Ruiz-Luna, Arturo; Berlanga-Robles, Cesar Alejandro | 2008 | Assessment of runoff response to landscape changes in the San Pedro subbasin (Nayarit, Mexico) using remote sensing data and GIS | JOURNAL OF ENVIRONMENTAL SCIENCE AND HEALTH PART A-TOXIC/HAZARDOUS SUBSTANCES & ENVIRONMENTAL ENGINEERING | 43 | ### | ### | Ecología ecosistémica | N/A | Nayarit | Nayarit | Ribereño |
| Pech, Daniel; Ardisson, Pedro-Luis; Bourget, Edwin; Condal, Alfonso R. | 2007 | Abundance variability of benthic intertidal species: effects of changing scale on patterns perception | ECOGRAPHY | 30 | 637 | 648 | Distribución | Invertebrados | Península de Yucatán | Campeche | Marino |
| Lopez-Olmedo, L. I.; Meave, J. A.; Perez-Garcia, E. A. | 2007 | Floristic and structural contrasts between natural savannas and anthropogenic pastures in a tropical dry landscape | RANGELAND JOURNAL | 29 | 181 | 190 | Modificación / cambio de uso de suelo | Plantas | Zizanda | Oaxaca | tropical |
| Gerritsen, Peter; Wiersum, Freerk | 2005 | Farmer and Conventional Perspectives on Conservation in Western Mexico | MOUNTAIN RESEARCH AND DEVELOPMENT | 25 | 30 | 36 | Conservación y manejo | N/A | Cuzalapa | Jalisco | tropical |
| Campos, A | 2004 | Effects of subsistence farming system on soil surface CO2-C flux on Cofre de Perote volcano slopes, Veracruz (Mexico) | FOREST ECOLOGY AND MANAGEMENT | 199 | 273 | 282 | Ecología ecosistémica | N/A | Volcán cofre de Perote | Veracruz | montaña |
| Velazquez, A; Fregoso, A; Bocco, G; Cortez, G | 2003 | The use of a landscape approach in Mexican forest indigenous communities to strengthen long-term forest management | INTERCIENCIA | 28 | 632 | + | Conservación y manejo | Plantas | San Juan Parangaricutiro | Michoacán | Montaña |
| Orihuela-Belmonte, D. E.; de Jong, B. H. J.; Mendoza-Vega, J.; Van der Wal, J.; Paz-Pellat, F.; Soto-Pinto, L.; Flamenco-Sandoval, A. | 2013 | Carbon stocks and accumulation rates in tropical secondary forests at the scale of community, landscape and forest type | AGRICULTURE ECOSYSTEMS & ENVIRONMENT | 171 | 72 | 84 | Restauración - Sucesión ecológica | N/A | El Ocote | Chiapas | tropical |
| Ribeiro Palacios, Monica; Huber-Sannwald, Elisabeth; Garcia Barrios, Luis; Pena de Paz, Francisco; Carrera Hernandez, Jaime; Galindo Mendoza, Maria de Guadelupe | 2013 | Landscape diversity in a rural territory: Emerging land use mosaics coupled to livelihood diversification | LAND USE POLICY | 30 | 814 | 824 | Modificación / cambio de uso de suelo | N/A | Huasteca | San Luis Potosí | Tropical |
| Cabrera-Guzman, Elisa; Hugo Reynoso, Victor | 2012 | Amphibian and reptile communities of rainforest fragments: minimum patch size to support high richness and abundance | BIODIVERSITY AND CONSERVATION | 21 | ### | ### | Fragmentación | Anfibios y reptiles | Los Tuxtlas | Veracruz | tropical |
| Caballero, Ubaldo; Leon-Cortes, Jorge L. | 2012 | High diversity beetle assemblages attracted to carrion and dung in threatened tropical oak forests in Southern Mexico | JOURNAL OF INSECT CONSERVATION | 16 | 537 | 547 | Modificación / cambio de uso de suelo | Invertebrados | Sureste de México | Chiapas | varios |
| Garcia-Estrada, Carlos; Damon, Anne; Sanchez-Hernandez, Cornelio; Soto-Pinto, Lorena; Ibarra-Nunez, Guillermo | 2012 | Diets of Frugivorous Bats in Montane Rain Forest and Coffee Plantations in Southeastern Chiapas, Mexico | BIOTROPICA | 44 | 394 | 401 | Agroecosistemas | Mamíferos | Chiapas | Chiapas | tropical |
| Antonio Castro-Luna, Alejandro; Galindo-Gonzalez, Jorge | 2012 | Enriching agroecosystems with fruit-producing tree species favors the abundance and richness of frugivorous and nectarivorous bats in Veracruz, Mexico | MAMMALIAN BIOLOGY | 77 | 32 | 40 | Agroecosistemas | Mamíferos | Coatepec y Xico | Veracruz | tropical |
| Ortiz-Pulido, R.; Lara Rodriguez, C. | 2012 | Is energy in nectar a good predictor of hummingbird activity at landscape scale? | ITALIAN JOURNAL OF ZOOLOGY | 79 | 100 | 104 | Uso de hábitat | Aves | La Malinche | Tlaxcala | Montaña |
| Figel, Joe J.; Duran, Elvira; Bray, David Barton | 2011 | Conservation of the jaguar Panthera onca in a community-dominated landscape in montane forests in Oaxaca, Mexico | ORYX | 45 | 554 | 560 | Conservación y manejo | Mamíferos | Sierra Norte | Oaxaca | montaña |
| Parra-Tabla, Victor; Vargas, Carlos F.; Naval, Celina; Calvo, Luz M.; Ollerton, Jeff | 2011 | Population Status and Reproductive Success of an Endangered Epiphytic Orchid in a Fragmented Landscape | BIOTROPICA | 43 | 640 | 647 | Conservación y manejo | Plantas | Península de Yucatán | Yucatán | tropical |
| LÓPEZ-LUNA, Marco A.; HIDALGO-MIHART, Mircea G.; AGUIRRE-LEÓN, Gustavo | 2011 | Description of Morelet's crocodile Crocodylus moreletii nests from an urban landscape in southeastern Mexico | Acta zoológica mexicana | 27 | 1 | 16 | Ecología urbana | Reptiles | Laguna de las Ilusiones, Villahermosa | Tabasco | urbano |
| Antonio Gonzalez-Oreja, Jose | 2011 | Birds of different biogeographic origins respond in contrasting ways to urbanization | BIOLOGICAL CONSERVATION | 144 | 234 | 242 | Ecología urbana | Aves |  | Varios | urbano |
| Mendoza-Ponce, Alma; Galicia, Leopoldo | 2010 | Aboveground and belowground biomass and carbon pools in highland temperate forest landscape in Central Mexico | FORESTRY | 83 | 497 | 506 | Ecología ecosistémica | N/A | Volcán cofre de Perote | Veracruz | montaña |
| de la Mora, Aldo; Phlpott, Stacy M. | 2010 | Wood-Nesting Ants and Their Parasites in Forests and Coffee Agroecosystems | ENVIRONMENTAL ENTOMOLOGY | 39 | ### | ### | Agroecosistemas | Invertebrados | Soconusco | Chiapas | tropical |
| Campos C, Adolfo | 2010 | Response of Soil Inorganic Nitrogen to Land Use and Topographic Position in the Cofre de Perote Volcano (Mexico) | ENVIRONMENTAL MANAGEMENT | 46 | 213 | 224 | Ecología ecosistémica | N/A | Volcán cofre de Perote | Veracruz | montaña |
| Diaz, Alfonso; Galante, Eduardo; Favila, Mario E. | 2010 | The effect of the landscape matrix on the distribution of dung and carrion beetles in a fragmented tropical rain forest | JOURNAL OF INSECT SCIENCE | 10 |  |  | Modificación / cambio de uso de suelo | Invertebrados | Los Tuxtlas | Veracruz | tropical |
| Del Amo-Rodriguez, Silvia; Del Carmen Vergara-Tenorio, Maria; Maria Ramos-Prado, Jose; Porter-Bolland, Luciana | 2010 | Community Landscape Planning for Rural Areas: A Model for Biocultural Resource Management | SOCIETY & NATURAL RESOURCES | 23 | 436 | 450 | Conservación y manejo | N/A | México (País) | Varios | tropical |
| Ortega-Alvarez, Ruben; MacGregor-Fors, Ian | 2010 | What matters most? Relative effect of urban habitat traits and hazards on urban park birds | ORNITOLOGIA NEOTROPICAL | 21 | 519 | 533 | Ecología urbana | Aves | Ciudad de México | Ciudad de México | urbano |
| Smith, Steven E.; Arredondo, Tulio; Aguiar, Martin; Huber-Sannwald, Elisabeth; Alpuche, Angel; Aguado, Armando; Grageda, Oscar A.; Halbrook, Kandres; Bottini, Cecilia | 2009 | Fine-Scale Spatial Genetic Structure in Perennial Grasses in Three Environments | RANGELAND ECOLOGY & MANAGEMENT | 62 | 356 | 363 | Genética del paisaje | Plantas | Arizona, México, Argentina | Jalisco | árido |
| Luis Valverde, Pedro; Alejandro Zavala-Hurtado, Jose; Jimenez-Sierra, Cecilia; Rendon-Aguilar, Beatriz; Cornejo-Romero, Amelia; Rivas-Arancibia, Sombra; Lopez-Ortega, Gerardo; Aurelio Perez-Hernandez, Marco | 2009 | Assessment of extinction risk of Mammillaria pectinifera, an endemic cactus of the Tehuacan-Cuicatlan region | REVISTA MEXICANA DE BIODIVERSIDAD | 80 | 219 | 230 | Conservación y manejo | Plantas | Tehuacán-Cuicatlán | Puebla | semiárido |
| Sanchez-Martinez, Tania C.; Renton, Katherine | 2009 | Availability and selection of arboreal termitaria as nest-sites by Orange-fronted Parakeets Aratinga canicularis in conserved and modified landscapes in Mexico | IBIS | 151 | 311 | 320 | Uso de hábitat | Aves | Chamela - Cuixmala | Jalisco | tropical |
| Ortega-Huerta, Miguel Alfonso; Kral, Karla Kae | 2007 | Relating biodiversity and landscape spatial patterning to land ownership regimes in northeastern Mexico | ECOLOGY AND SOCIETY | 12 |  |  | Conservación y manejo | N/A | Noreste de México | Varios | varios |
| Bezaury, Josefina Aranda | 2007 | Organized coffee producers: Mitigating negative impacts of outmigration in Oaxaca, Mexico | MOUNTAIN RESEARCH AND DEVELOPMENT | 27 | 109 | 113 | Agroecosistemas | N/A | Oaxaca | Oaxaca | tropical |
| Ortega Huerta, Miguel A. | 2007 | Fragmentation patterns and implications for biodiversity conservation in three biosphere reserves and surrounding regional environments, northeastern Mexico | BIOLOGICAL CONSERVATION | 134 | 83 | 95 | Fragmentación | Mamíferos y aves | Noreste de México | Varios | varios |
| Arroyo-Rodriguez, Victor; Roes, Matthias; Escobar, Federico; Melo, Felipe P. L.; Santos, Braulio A.; Tabarelli, Marcelo; Chazdon, Robin | 2013 | Plant beta-diversity in fragmented rain forests: testing floristic homogenization and differentiation hypotheses | JOURNAL OF ECOLOGY | 101 | ### | ### | Fragmentación | Plantas | Los Tuxtlas | Veracruz | tropical |
| Murrieta-Galindo, Rene; Gonzalez-Romero, Alberto; Lopez-Barrera, Fabiola; Parra-Olea, Gabriela | 2013 | Coffee agrosystems: an important refuge for amphibians in central Veracruz, Mexico | AGROFORESTRY SYSTEMS | 87 | 767 | 779 | Agroecosistemas | Anfibios | Coatepec, Xico, Xalapa, Huatusco | Veracruz | tropical |
| Reyes-Garcia, Victoria; Ruiz-Mallen, Isabel; Porter-Bolland, Luciana; Garcia-Frapolli, Eduardo; Ellis, Edward A.; Mendez, Maria-Elena; Pritchard, Diana J.; Sanchez-Gonzalez, Maria-Consuelo | 2013 | Local Understandings of Conservation in Southeastern Mexico and Their Implications for Community-Based Conservation as an Alternative Paradigm | CONSERVATION BIOLOGY | 27 | 856 | 865 | Conservación y manejo | N/A | Sureste de México | Varios | tropical |
| Carmona-lslas, Cynthia; Bello-Pineda, Javier; Carmona, Roberto; Velarde, Enriqueta | 2013 | Spatial modelling to detect potential feeding grounds for migratory shorebirds in northwestern Mexico | Huitzil | 14 | 22 | 36 | Distribución | Aves | Noreste de México | Varios | Costero |
| Zuria, Iriana; Gates, J. Edward | 2013 | Community composition, species richness, and abundance of birds in field margins of central Mexico: local and landscape-scale effects | AGROFORESTRY SYSTEMS | 87 | 377 | 393 | Cercas vivas | Aves | Centro de México | Guanajuato | semiárido |
| Estrada, Alejandro | 2013 | Socioeconomic Contexts of Primate Conservation: Population, Poverty, Global Economic Demands, and Sustainable Land Use | AMERICAN JOURNAL OF PRIMATOLOGY | 75 | 30 | 45 | Conservación y manejo | Mamíferos | México y otros países | N/A | tropical |
| Moritz, Robin F. A.; Kraus, F. Bernhard; Huth-Schwarz, Anett; Wolf, Stephan; Carrillo, Claudia A. Castillo; Paxton, Robert J.; Vandame, Remy | 2013 | Number of honeybee colonies in areas with high and low beekeeping activity in Southern Mexico | APIDOLOGIE | 44 | 113 | 120 | Uso de hábitat | Invertebrados | Sureste de México | Varios | tropical |
| Munguia-Vega, Adrian; Rodriguez-Estrella, Ricardo; Shaw, William W.; Culver, Melanie | 2013 | Localized extinction of an arboreal desert lizard caused by habitat fragmentation | BIOLOGICAL CONSERVATION | 157 | 11 | 20 | Fragmentación | Reptiles | Valle de Santo Domingo | Baja california | árido |
| GONZÁLEZ-VALDIVIA, Noel A.; ARRIAGA-WEISS, Stefan L.; OCHOA-GAONA, Susana; FERGUSON, Bruce G.; KAMPICHLER, Christian; POZO, Carmen | 2012 | Diurnal bird assemblages along a disturbance gradient in a landscape in Southeast Mexico | Acta zoológica mexicana | 28 | 237 | 269 | Modificación / cambio de uso de suelo | Aves | Chapultepec | Tabasco | tropical |
| Arias-Del Razo, Itzel; Hernandez, Lucina; Laundre, John W.; Velasco-Vazquez, Lourdes | 2012 | The landscape of fear: habitat use by a predator (Canis latrans) and its main prey (Lepus californicus and Sylvilagus audubonii) | CANADIAN JOURNAL OF ZOOLOGY-REVUE CANADIENNE DE ZOOLOGIE | 90 | 683 | 693 | Uso de hábitat | Mamíferos | Reserva Mapimi | Varios | semiárido |
| Canales-Delgadillo, Julio Cesar; Scott-Morales, Laura; Korb, Judith | 2012 | The influence of habitat fragmentation on genetic diversity of a rare bird species that commonly faces environmental fluctuations | JOURNAL OF AVIAN BIOLOGY | 43 | 168 | 176 | Genética del paisaje | Aves | Coahuila, San Luís Potosí, Nuevo León | Varios | varios |
| Diaz-Rodriguez, Berenice; Blanco-Garcia, Arnulfo; Gomez-Romero, Mariela; Lindig-Cisneros, Roberto | 2012 | Filling the gap: Restoration of biodiversity for conservation in productive forest landscapes | ECOLOGICAL ENGINEERING | 40 | 88 | 94 | Restauración - Sucesión ecológica | Plantas | Nuevo San Juan Parangaricutiro | Michoacán | Montaña |
| Voegler, Rodolfo; Beier, Emilio; Ortega-Garcia, Sofia; Santana-Hernandez, Heriberto; Javier Valdez-Flores, J. | 2012 | Ecological patterns, distribution and population structure of Prionace glauca (Chondrichthyes: Carcharhinidae) in the tropical-subtropical transition zone of the north-eastern Pacific | MARINE ENVIRONMENTAL RESEARCH | 73 | 37 | 52 | Distribución | Invertebrados | Oeste de México, Océano Pacífico | Varios | Marino |
| Couturier, Stephane; Ricardez, Mauricio; Osorno, Javier; Lopez-Martinez, Ricardo | 2011 | Morpho-spatial extraction of urban nuclei in diffusely urbanized metropolitan areas | LANDSCAPE AND URBAN PLANNING | 101 | 338 | 348 | Ecología urbana | N/A | Toluca-Atlacomulco valle | Estado de México | urbano |
| Amezquita, Sandra; Favila, Mario E. | 2011 | Carrion Removal Rates and Diel Activity of Necrophagous Beetles (Coleoptera: Scarabaeinae) in a Fragmented Tropical Rain Forest | ENVIRONMENTAL ENTOMOLOGY | 40 | 239 | 246 | Fragmentación | Invertebrados | Los Tuxtlas | Veracruz | tropical |
| Garcia-Barrios, Luis; Garcia-Barrios, Raul; Waterman, Andrew; Cruz-Morales, Juana | 2011 | Social dilemmas and individual/group coordination strategies in a complex rural land-use game | INTERNATIONAL JOURNAL OF THE COMMONS | 5 | 364 | 387 | Conservación y manejo | N/A |  | Chiapas | tropical |
| Rodriguez-Mendoza, Clara; Pineda, Eduardo | 2010 | Importance of riparian remnants for frog species diversity in a highly fragmented rainforest | BIOLOGY LETTERS | 6 | 781 | 784 | Uso de hábitat | Anfibios | Los Tuxtlas | Veracruz | tropical |
| Figueroa-Esquivel, Elsa M.; Puebla-Olivares, Fernando; Eguiarte, Luis E.; Nunez-Farfan, Juan | 2010 | Genetic structure of a bird-dispersed tropical tree (Dendropanax arboreus) in a fragmented landscape in Mexico | REVISTA MEXICANA DE BIODIVERSIDAD | 81 | 789 | 800 | Genética del paisaje | Plantas | Los Tuxtlas | Veracruz | tropical |
| Cuartas-Hernandez, S.; Nunez-Farfan, J.; Smouse, P. E. | 2010 | Restricted pollen flow of Dieffenbachia seguine populations in fragmented and continuous tropical forest | HEREDITY | 105 | 197 | 204 | Fragmentación | Plantas | Los Tuxtlas | Veracruz | tropical |
| Gomez-Aiza, Laura; Zuria, Iriana | 2010 | Bird visitation to maguey flowers (Agave salmiana) in an urban area of central Mexico. | ORNITOLOGIA NEOTROPICAL | 21 | 17 | 30 | Ecología urbana | Aves |  | Hidalgo | urbano |
| Sanfiorenzo-Barnhard, Colibri; Garcia-Barrios, Luis; Melendez-Ackerman, Elvia; Trujillo-Vasquez, Romeo | 2009 | Woody Cover and Local Farmers' Perceptions of Active Pasturelands in La Sepultura Biosphere Reserve Buffer Zone, Mexico | MOUNTAIN RESEARCH AND DEVELOPMENT | 29 | 320 | 327 | Conservación y manejo | N/A | La Sepultura, Sureste de México | Chiapas | tropical |
| Chavez, Cuauhtemoc; Ceballos, Gerardo | 2009 | Implications for Conservation of the Species Diversity and Population Dynamics of Small Mammals in an Isolated Reserve in Mexico City | NATURAL AREAS JOURNAL | 29 | 27 | 41 | Ecología urbana | Mamíferos | Ciudad de México | Estado de México | urbano |
| Cano-Santana, Zenon; Castillo-Arguero, Silvia; Martinez-Orea, Yuriana; Juarez-Orozco, Sonia | 2008 | Analysis of plant richness and conservation value of the three areas added to the Pedregal de San Angel Ecological Reserve, Federal District (Mexico) | BOLETIN DE LA SOCIEDAD BOTANICA DE MEXICO | 82 | 1 | 14 | Ecología urbana | Plantas | Ciudad de México | Estado de México | urbano |
| Sanchez-Flores, E.; Rodriguez-Gallegos, H.; Yool, S. R. | 2008 | Plant invasions in dynamic desert landscapes. A field and remote sensing assessment of predictive and change modeling | JOURNAL OF ARID ENVIRONMENTS | 72 | 189 | 206 | Invasión de especies | Plantas | | Sonora | árido |
| Jurado, Enrique; Flores, Joel; Endress, Anton G.; Flores, Mercedes; Estrada, Eduardo; Pando, Marisela | 2006 | Seed removal rates under isolated trees and continuous vegetation in semiarid thornscrub | RESTORATION ECOLOGY | 14 | 204 | 209 | Árboles aislados | Plantas | Linares | Nuevo León | semiárido |
| Breceda, A; Arriaga, L; Bojorquez, L; Rodriguez, M | 2005 | Defining critical areas for conservation and restoration in a Mexican biosphere reserve: A case study | NATURAL AREAS JOURNAL | 25 | 123 | 129 | Diseño de reservas | N/A | Baja California | Baja California | semiárido |
| Allnutt, TF; Wettengel, WW; Reyna, JV; Garcia, RCD; Elias, EEI; Olson, DM | 2002 | The efficacy of TM satellite imagery for rapid assessment of Chihuahuan xeric habitat intactness for ecoregion-scale conservation planning | JOURNAL OF ARID ENVIRONMENTS | 52 | 135 | 153 | Conservación y manejo | Plantas | Desierto Chihuahuense | Varios | árido |
| Rehfeldt, Gerald E.; Leites, Laura P.; St Clair, J. Bradley; Jaquish, Barry C.; Saenz-Romero, Cuauhtemoc; Lopez-Upton, Javier; Joyce, Dennis G. | 2014 | Comparative genetic responses to climate in the varieties of Pinus ponderosa and Pseudotsuga menziesii: Clines in growth potential | FOREST ECOLOGY AND MANAGEMENT | 324 | 138 | 146 | Genética del paisaje | Plantas | México y otros países | Varios | N/A |
| Zambrano, Jenny; Coates, Rosamond; Howe, Henry F. | 2014 | Effects of forest fragmentation on the recruitment success of the tropical tree Poulsenia armata at Los Tuxtlas, Veracruz, Mexico | JOURNAL OF TROPICAL ECOLOGY | 30 | 209 | 218 | Fragmentación | Plantas | Los Tuxtlas | Veracruz | tropical |
| Sunny, Armando; Monroy-Vilchis, Octavio; Fajardo, Victor; Aguilera-Reyes, Ulises | 2014 | Genetic diversity and structure of an endemic and critically endangered stream river salamander (Caudata: Ambystoma leorae) in Mexico | CONSERVATION GENETICS | 15 | 49 | 59 | Genética del paisaje | Anfibios | Parque Nacional Iztaccihuatl-Popocatepetl (Estado de México y Puebla) | Varios | montaña |
| McGroddy, Megan; Lawrence, Deborah; Schneider, Laura; Rogan, John; Zager, Irene; Schmook, Birgit | 2013 | Damage patterns after Hurricane Dean in the southern Yucatan: Has human activity resulted in more resilient forests? | FOREST ECOLOGY AND MANAGEMENT | 310 | 812 | 820 | Conservación y manejo | Plantas | Península de Yucatán | Varios | tropical |
| DiGiano, Maria; Ellis, Edward; Keys, Eric | 2013 | Changing Landscapes for Forest Commons: Linking Land Tenure with Forest Cover Change Following Mexico's 1992 Agrarian Counter-Reforms | HUMAN ECOLOGY | 41 | 707 | 723 | Conservación y manejo | N/A |  | Quintana Roo | tropical |
| Garcia-Morales, Rodrigo; Badano, Ernesto I.; Moreno, Claudia E. | 2013 | Response of Neotropical Bat Assemblages to Human Land Use | CONSERVATION BIOLOGY | 27 | ### | ### | Modificación / cambio de uso de suelo | Mamíferos | México y otros países | N/A | tropical |
| Essens, Tijl; Luis Hernandez-Stefanoni, Jose | 2013 | Mapping Lepidoptera and plant alpha-diversity across a heterogeneous tropical dry forest using field and remotely sensed data with spatial interpolation | JOURNAL OF INSECT CONSERVATION | 17 | 725 | 736 | Distribución | Varios | Península de Yucatán | Varios | tropical |
| Garmendia, Adriana; Arroyo-Rodriguez, Victor; Estrada, Alejandro; Naranjo, Eduardo J.; Stoner, Kathryn E. | 2013 | Landscape and patch attributes impacting medium- and large-sized terrestrial mammals in a fragmented rain forest | JOURNAL OF TROPICAL ECOLOGY | 29 | 331 | 344 | Fragmentación | Mamíferos | Lacandona | Chiapas | tropical |
| Ramirez Restrepo, Lorena; Halffter, Gonzalo | 2013 | Butterfly diversity in a regional urbanization mosaic in two Mexican cities | LANDSCAPE AND URBAN PLANNING | 115 | 39 | 48 | Ecología urbana | Invertebrados | Xalapa | Veracruz | urbano |
| Poulos, H. M.; Villanueva Diaz, J.; Cerano Paredes, J.; Camp, A. E.; Gatewood, R. G. | 2013 | Human influences on fire regimes and forest structure in the Chihuahuan Desert Borderlands | FOREST ECOLOGY AND MANAGEMENT | 298 | 1 | 11 | Conservación y manejo | N/A | Desierto Chihuahuense | Varios | árido |
| De la Mora, A.; Murnen, C. J.; Philpott, S. M. | 2013 | Local and landscape drivers of biodiversity of four groups of ants in coffee landscapes | BIODIVERSITY AND CONSERVATION | 22 | 871 | 888 | Agroecosistemas | Invertebrados | Soconusco | Chiapas | tropical |
| Ortega-Alvarez, Ruben; Lindig-Cisneros, Roberto; MacGregor-Fors, Ian; Renton, Katherine; Schondube, Jorge E. | 2013 | Avian community responses to restoration efforts in a complex volcanic landscape | ECOLOGICAL ENGINEERING | 53 | 275 | 283 | Restauración - Sucesión ecológica | Aves | Volcán de Paricutín | Michoacán | montaña |
| Garcia-Gonzalez, Alfredo; Damon, Anne; Iturbide, Francisco A.; Olalde-Portugal, Victor | 2013 | Reproduction of Oncidium poikilostalix (Orchidaceae), potentially invading coffee plantations in Soconusco, Chiapas, Mexico | PLANT ECOLOGY AND EVOLUTION | 146 | 36 | 44 | Agroecosistemas | Plantas | Soconusco | Chiapas | tropical |
| Livingston, George; Philpott, Stacy M.; Rodriguez, Aldo de la Mora | 2013 | Do Species Sorting and Mass Effects Drive Assembly in Tropical Agroecological Landscape Mosaics? | BIOTROPICA | 45 | 10 | 17 | Distribución | Invertebrados | Soconusco | Chiapas | tropical |
| Murrieta-Galindo, Rene; Lopez-Barrera, Fabiola; Gonzalez-Romero, Alberto; Parra-Olea, Gabriela | 2013 | Matrix and habitat quality in a montane cloud-forest landscape: amphibians in coffee plantations in central Veracruz, Mexico | WILDLIFE RESEARCH | 40 | 25 | 35 | Agroecosistemas | Anfibios | Veracruz | Veracruz | tropical |
| Machkour-M'Rabet, Salima; Henaut, Yann; Calme, Sophie; Legal, Luc | 2012 | When landscape modification is advantageous for protected species. The case of a synanthropic tarantula, Brachypelma vagans | JOURNAL OF INSECT CONSERVATION | 16 | 479 | 488 | Modificación / cambio de uso de suelo | Invertebrados | Península de Yucatán | Varios | Tropical |
| Pineda-Diez de Bonilla, Esteban; Leon-Cortes, Jorge L.; Luis Rangel-Salazar, Jose | 2012 | Diversity of bird feeding guilds in relation to habitat heterogeneity and land-use cover in a human-modified landscape in southern Mexico | JOURNAL OF TROPICAL ECOLOGY | 28 | 369 | 376 | Fragmentación | Aves | Sureste de México | Chiapas | tropical |
| Arriaga, Alfonsina; Halffter, Gonzalo; Moreno, Claudia | 2012 | Biogeographical affinities and species richness of copronecrophagous beetles (Scarabaeoidea) in the southeastern Mexican High Plateau | REVISTA MEXICANA DE BIODIVERSIDAD | 83 | 519 | 529 | Distribución | Invertebrados | Centro de México | Varios | semiárido |
| Cruz-Elizalde, Raciel; Ramirez-Bautista, Aurelio | 2012 | Diversity of reptiles in three vegetation types of the Hidalgo state, Mexico | REVISTA MEXICANA DE BIODIVERSIDAD | 83 | 458 | 467 | Uso de hábitat | Reptiles | Hidalgo | Hidalgo | varios |
| Gonzalez-Valdivia, Noel; Ochoa-Gaona, Susana; Ferguson, Bruce G.; Pozo, Carmen; Kampichler, Christian; Perez-Hernandez, Isidro | 2012 | Comparative analysis of structure, diversity and composition of tree communities in an agricultural landscape of Tabasco, Mexico | REVISTA MEXICANA DE BIODIVERSIDAD | 83 | 83 | 99 | Modificación / cambio de uso de suelo | Plantas | Chapultepec | Tabasco | tropical |
| Hernandez-Ladron De Guevara, Ivette; Rojas-Soto, Octavio R.; Lopez-Barrera, Fabiola; Puebla-Olivares, Fernando; Diaz-Castelazo, Cecilia | 2012 | Seed dispersal by birds in a cloud forest landscape in central Veracruz, Mexico: Its role in passive restoration | REVISTA CHILENA DE HISTORIA NATURAL | 85 | 89 | 100 | Restauración - Sucesión ecológica | Aves | Huatusco | Veracruz | mesófilo |
| Avila-Flores, Rafael; Ceballos, Gerardo; de Villa-Meza, Alejandra; List, Rurik; Marce, Erika; Pacheco, Jesus; Arturo Sanchez-Azofeifa, G.; Boutin, Stan | 2012 | Factors associated with long-term changes in distribution of black-tailed prairie dogs in northwestern Mexico | BIOLOGICAL CONSERVATION | 145 | 54 | 61 | Distribución | Mamíferos | Noroeste de México | Chihuahua | semiárido |
| Campos, Minerva; Velazquez, Alejandro; Bocco Verdinelli, Gerardo; Guadalupe Priego-Santander, Angel; McCall, Michael K.; Boada, Marti | 2012 | Rural People's Knowledge and Perception of Landscape: A Case Study From the Mexican Pacific Coast | SOCIETY & NATURAL RESOURCES | 25 | 759 | 774 | Conservación y manejo | N/A | Coahuayana | Michoacán | Costero |
| Halffter, G.; Verdu, J. R.; Moreno, C. E.; Halffter, V. | 2012 | Historical and ecological determinants of dung beetle assemblages in two arid zones of central Mexico | JOURNAL OF ARID ENVIRONMENTS | 76 | 54 | 60 | Modificación / cambio de uso de suelo | Invertebrados | Centro de México | Varios | árido |
| Figueroa, Fernanda; Sanchez-Cordero, Victor; Illoldi-Rangel, Patricia; Linaje, Miguel | 2011 | Evaluation of protected area effectiveness for preventing land use and land cover changes in Mexico. Is an index good enough? | REVISTA MEXICANA DE BIODIVERSIDAD | 82 | 951 | 963 | Diseño de reservas | N/A |  | Varios | varios |
| Pech-Canche, Juan M.; Moreno, Claudia E.; Halffter, Gonzalo | 2011 | Additive partitioning of Phyllostomid bat richness at fine and coarse spatial and temporal scales in Yucatan, Mexico | ECOSCIENCE | 18 | 42 | 51 | Distribución | Mamíferos | Península de Yucatán | Yucatán | tropical |
| Ramirez-Barahona, Santiago; Luna-Vega, Isolda; Tejero-Diez, Daniel | 2011 | Species richness, endemism, and conservation of American tree ferns (Cyatheales) | BIODIVERSITY AND CONSERVATION | 20 | 59 | 72 | Distribución | Plantas | México y otros países | N/A | N/A |
| Welsh, Hartwell H., Jr.; Clark, William H.; Franco-Vizcaino, Ernesto; Valdez Villavicencio, Jorge H. | 2010 | Herpetofauna associated with palm oases across the Californian Sonoran transition in northern Baja California, México | SOUTHWESTERN NATURALIST | 55 | 581 | 585 | Distribución | Anfibios y reptiles | Baja California | Baja California | árido |
| Hirales-Cota, M.; Espinoza-Avalos, J.; Schmook, B.; Ruiz-Luna, A.; Ramos-Reyes, R. | 2010 | Drivers of mangrove deforestation in Mahahual-Xcalak, Quintana Roo, southeast Mexico | CIENCIAS MARINAS | 36 | 147 | 159 | Modificación / cambio de uso de suelo | Plantas | Mahahual-Xcalak | Quintana Roo | Costero |
| CANCINO, Jorge; RODRÍGUEZ-ESTRELLA, Ricardo; MILLER, Philip | 2010 | Using population viability analysis for management recommendations of the endangered endemic peninsular pronghorn. | Acta zoológica mexicana | 26 | 173 | 189 | Conservación y manejo | Mamíferos | Reserva El Vizcaíno (Baja California, Baja California Sur) | Varios | semiárido |
| Barragan, Felipe; Lorenzo, Consuelo; Moron, Alejandro; Briones-Salas, Miguel A.; Lopez, Sergio | 2010 | Bat and rodent diversity in a fragmented landscape on the Isthmus of Tehuantepec, Oaxaca, Mexico | TROPICAL CONSERVATION SCIENCE | 3 | 1 | 16 | Fragmentación | Mamíferos | Istmo de Tehuantepec | Oaxaca | tropical |
| Cervantes-Cornihs, Elizabeth; Zuria, Iriana; Castellanos, Ignacio | 2009 | Artificial nest predation in hedgerows of an agro-urban system in Hidalgo, México | INTERCIENCIA | 34 | 777 | 783 | Cercas vivas | Aves | Hidalgo | Hidalgo | semiárido |
| Ortega-Rodriguez, Juan Manuel; Monterrubio-Rico, Tiberio C. | 2008 | Geographic characteristics of the Lilac-crowned Parrot (Amazona finschi) nest sites on coastal Michoacan, Mexico | ORNITOLOGIA NEOTROPICAL | 19 | 427 | 439 | Distribución | Aves | Coahuayana y Aquila | Michoacán | Costero |
| Jimenez-Ferrer, Guillermo; Perez-Lopez, Hernan; Soto-Pinto, Lorena; Nahed-Toral, Jose; Hernandez-Lopez, Lorenzo; Carmona, Jesus | 2007 | Livestock, nutritive value and local knowledge of fodder trees in fragment landscapes in Chiapas, Mexico | INTERCIENCIA | 32 | 274 | 280 | Conservación y manejo | Plantas | Espatajamal y San Caralampio | Chiapas | tropical |
| Hudson, Paul F.; Colditz, Rene R.; Aguilar-Robledo, Miguel | 2006 | Spatial relations between floodplain environments and land use - Land cover of a large lowland tropical river valley: Panuco basin, Mexico | ENVIRONMENTAL MANAGEMENT | 38 | 487 | 503 | Modificación / cambio de uso de suelo | N/A | Cuenca de Panuco | Veracruz | tropical |
| Cabrera-Garcia, Leonardo; Montes, Jose Alejandro Velazquez; Weinmann, Martha Elena Escamilla | 2006 | Identification of priority habitats for conservation of the Sierra Madre sparrow Xenospiza baileyi in Mexico | ORYX | 40 | 211 | 217 | Conservación y manejo | Aves | Valle de México | Varios | montaña |
| Guevara, R | 2005 | Saprotrophic mycelial cord abundance, length and survivorship are reduced in the conversion of tropical cloud forest to shaded coffee plantation | BIOLOGICAL CONSERVATION | 125 | 261 | 268 | Agroecosistemas | Hongos | Veracruz | Veracruz | mesófilo |
| Garcia-Romero, A | 2004 | Dynamics of post-fire landscape in high mountain tropical grassland. Iztaccihuatl volcano, Mexico | INTERCIENCIA | 29 | 604 | + | Distribución | Plantas | Centro de México | Varios | montaña |
| Chavez, AGT; Bernal-Brooks, FW; Alcocer, J | 2002 | Sensitivity of Mexican water bodies to regional climatic change: three study alternatives applied to remote sensed data of Lake Patzcuaro | HYDROBIOLOGIA | 467 | 169 | 176 | Cambio climático | N/A | Lago Patzcuaro | Michoacán | Humedal |
| Lopez-Barrera, Fabiola; Manson, Robert H.; Landgrave, Rosario | 2014 | Identifying deforestation attractors and patterns of fragmentation for seasonally dry tropical forest in central Veracruz, Mexico | LAND USE POLICY | 41 | 274 | 283 | Modificación / cambio de uso de suelo | N/A | Veracruz | Veracruz | tropical |
| Ayram, Camilo A. Correa; Mendoza, Manuel E.; Salicrup, Diego R. Perez; Granados, Erna Lopez | 2014 | Identifying potential conservation areas in the Cuitzeo Lake basin, Mexico by multitemporal analysis of landscape connectivity | JOURNAL FOR NATURE CONSERVATION | 22 | 424 | 435 | Conectividad | Mamíferos | Cuitzeo | Michoacán | Humedal |
| Barragan, Felipe; Moreno, Claudia E.; Escobar, Federico; Bueno-Villegas, Julian; Halffter, Gonzalo | 2014 | The impact of grazing on dung beetle diversity depends on both biogeographical and ecological context | JOURNAL OF BIOGEOGRAPHY | 41 | ### | ### | Distribución | Invertebrados | Centro de México | Hidalgo | varios |
| Camacho-Valdez, Vera; Ruiz-Luna, Arturo; Ghermandi, Andrea; Berlanga-Robles, Cesar A.; Nunes, Paulo A. L. D. | 2014 | Effects of Land Use Changes on the Ecosystem Service Values of Coastal Wetlands | ENVIRONMENTAL MANAGEMENT | 54 | 852 | 864 | Servicios ecosistémicos | N/A |  | Sinaloa | Costero |
| Cortes-Delgado, Natalia; Sosa, Vinicio J. | 2014 | Do Bats Roost and Forage in Shade Coffee Plantations? A Perspective from the Frugivorous Bat Sturnira hondurensis | BIOTROPICA | 46 | 624 | 632 | Agroecosistemas | Mamíferos | Xalapa | Veracruz | tropical |
| Ruiz-Guerra, Betsabe; Velazquez Rosas, Noe; Carlos Lopez-Acosta, Juan | 2014 | Plant Diversity in Live Fences and Pastures, Two Examples from the Mexican Humid Tropics | ENVIRONMENTAL MANAGEMENT | 54 | 656 | 667 | Cercas vivas | Plantas | Los Tuxtlas, Uxpanapa | Veracruz | tropical |
| Menge, Duncan N. L.; Lichstein, Jeremy W.; Angeles-Perez, Gregorio | 2014 | Nitrogen fixation strategies can explain the latitudinal shift in nitrogen-fixing tree abundance | ECOLOGY | 95 | ### | ### | Ecología ecosistémica | Plantas | México y otros países | N/A | varios |
| Chavez-Pesqueira, Mariana; Suarez-Montes, Pilar; Castillo, Guillermo; Nunez-Farfan, Juan | 2014 | Habitat fragmentation threatens wild populations of Carica papaya (caricaceae) in a lowland rainforest | AMERICAN JOURNAL OF BOTANY | 101 | ### | ### | Fragmentación | Plantas | Los Tuxtlas | Veracruz | tropical |
| Latch, Emily K.; Reding, Dawn M.; Heffelfinger, James R.; Alcala-Galvan, Carlos H.; Rhodes, Olin E. | 2014 | Range-wide analysis of genetic structure in a widespread, highly mobile species (Odocoileus hemionus) reveals the importance of historical biogeography | MOLECULAR ECOLOGY | 23 | ### | ### | Genética del paisaje | Mamíferos | México y otros países | N/A | semiárido |
| Puga-Caballero, Aura; MacGregor-Fors, Ian; Ortega-Alvarez, Ruben | 2014 | Birds at the urban fringe: avian community shifts in different peri-urban ecotones of a megacity | ECOLOGICAL RESEARCH | 29 | 619 | 628 | Ecología urbana | Aves | Ciudad de México | Estado de México | urbano |
| Murrieta-Galindo, Rene; Parra-Olea, Gabriela; Gonzalez-Romero, Alberto; Lopez-Barrera, Fabiola; Vredenburg, Vance T. | 2014 | Detection of Batrachochytrium dendrobatidis in amphibians inhabiting cloud forests and coffee agroecosystems in central Veracruz, Mexico | EUROPEAN JOURNAL OF WILDLIFE RESEARCH | 60 | 431 | 439 | Agroecosistemas | Anfibios | Coatepec, Xico, Xalapa, Huatusco | Veracruz | mesófilo |
| Benitez-Malvido, Julieta; Cesar Gallardo-Vasquez, Julio; Alvarez-Anorve, Mariana Y.; Daniel Avila-Cabadilla, Luis | 2014 | Influence of matrix type on tree community assemblages along tropical dry forest edges | AMERICAN JOURNAL OF BOTANY | 101 | 820 | 829 | Fragmentación | Plantas | Chamela - Cuixmala | Jalisco | tropical |
| Campos, Minerva; Velazquez, Alejandro; McCall, Michael | 2014 | Adaptation strategies to climatic variability: A case study of small-scale farmers in rural Mexico | LAND USE POLICY | 38 | 533 | 540 | Conservación y manejo | N/A | Coahuayana | Michoacán | Costero |
| Laundre, John W.; Hernandez, Lucina; Lopez Medina, Perla; Campanella, Andrea; Lopez-Portillo, Jorge; Gonzalez-Romero, Alberto; Grajales-Tam, Karina M.; Burke, Anna M.; Gronemeyer, Peg; Browning, Dawn M. | 2014 | The landscape of fear: the missing link to understand top-down and bottom-up controls of prey abundance? | ECOLOGY | 95 | ### | ### | Uso de hábitat | Mamíferos | Desierto Chihuahuense | Durango | Árido |
| Pfeifer, Marion; Lefebvre, Veronique; Gardner, Toby A.; Arroyo-Rodriguez, Victor; Baeten, Lander; Banks-Leite, Cristina; Barlow, Jos; Betts, Matthew G.; Brunet, Joerg; Cerezo, Alexis; Cisneros, Laura M.; Collard, Stuart; D'Cruze, Neil; da Silva Motta, Catarina; Duguay, Stephanie; Eggermont, Hilde; Eigenbrod, Felix; Hadley, Adam S.; Hanson, Thor R.; Hawes, Joseph E.; Scalley, Tamara Heartsill; Klingbeil, Brian T.; Kolb, Annette; Kormann, Urs; Kumar, Sunil; Lachat, Thibault; Lakeman Fraser, Poppy; Lantschner, Victoria; Laurance, William F.; Leal, Inara R.; Lens, Luc; Marsh, Charles J.; Medina-Rangel, Guido F.; Melles, Stephanie; Mezger, Dirk; Oldekop, Johan A.; Overal, William L.; Owen, Charlotte; Peres, Carlos A.; Phalan, Ben; Pidgeon, Anna M.; Pilia, Oriana; Possingham, Hugh P.; Possingham, Max L.; Raheem, Dinarzarde C.; Ribeiro, Danilo B.; Ribeiro Neto, Jose D.; Robinson, W. Douglas; Robinson, Richard; Rytwinski, Trina; Scherber, Christoph; Slade, Eleanor M.; Somarriba, Eduardo; Stouffer, Philip C.; Struebig, Matthew J.; Tylianakis, Jason M.; Tscharntke, Teja; Tyre, Andrew J.; Urbina-Cardona, J. Nicolas; Vasconcelos, Heraldo L.; Wearn, Oliver; Wells, Konstans; Willig, Michael R.; Wood, Eric; Young, Richard P.; Bradley, Andrew V.; Ewers, Robert M. | 2014 | BIOFRAG - a new database for analyzing BIOdiversity responses to forest FRAGmentation | ECOLOGY AND EVOLUTION | 4 | ### | ### | Métodos de análisis | N/A | N/A | N/A | N/A |
| Renato Ramos-Palacios, Carlos; Badano, Ernesto I.; Flores, Joel; Flores-Cano, Jorge A.; Flores-Flores, Jose L. | 2014 | Distribution patterns of acorns after primary dispersion in a fragmented oak forest and their consequences on predators and dispersers | EUROPEAN JOURNAL OF FOREST RESEARCH | 133 | 391 | 404 | Distribución | Plantas | Monte Caldera | San Luis Potosí | semiárido |
| Valencia, Vivian; Garcia-Barrios, Luis; West, Paige; Sterling, Eleanor J.; Naeem, Shahid | 2014 | The role of coffee agroforestry in the conservation of tree diversity and community composition of native forests in a Biosphere Reserve | AGRICULTURE ECOSYSTEMS & ENVIRONMENT | 189 | 154 | 163 | Agroecosistemas | Plantas | La Sepultura, Sureste de México | Chiapas | tropical |
| Aluja, Martin; Sivinski, John; Van Driesche, Roy; Anzures-Dadda, Alberto; Guillen, Larissa | 2014 | Pest management through tropical tree conservation | BIODIVERSITY AND CONSERVATION | 23 | 831 | 853 | Medicina de la conservación | Plantas | México (País) | Varios | tropical |
| Elizabeth Lee, Alison | 2014 | Territorialisation, Conservation, and Neoliberalism in the Tehuacan-Cuicatlan Biosphere Reserve, Mexico | CONSERVATION & SOCIETY | 12 | 147 | 161 | Diseño de reservas | N/A | Tehuacán-Cuicatlán-Zapotitlán | Puebla | semiárido |
| Fuentealba, Beatriz D.; Martinez-Ramos, Miguel | 2014 | Transplanting native tree seedlings to enrich tropical live fences: an ecological and socio-economic analysis | AGROFORESTRY SYSTEMS | 88 | 221 | 236 | Cercas vivas | Plantas | Hueytamalco | Puebla | tropical |
| Kingston, Sarah E.; Navarro-Sigueenza, Adolfo G.; Garcia-Trejo, Erick A.; Vazquez-Miranda, Hernan; Fagan, William F.; Braun, Michael J. | 2014 | Genetic differentiation and habitat connectivity across towhee hybrid zones in Mexico | EVOLUTIONARY ECOLOGY | 28 | 277 | 297 | Genética del paisaje | Aves | Teziutlán y cinturón transvolcánico | Varios | varios |
| Lopez-Acosta, J. C.; Lascurain, M.; Lopez Binnqueist, C.; Covarrubias, M. | 2014 | Structure and Floristic Composition of Forest Management Systems Associated with the Edible Fruit Tree Oecopetalum mexicanum in the Sierra de Misantla, Veracruz, Mexico | ECONOMIC BOTANY | 68 | 44 | 58 | Distribución | Plantas | Sierra Misantla | Veracruz | mesófilo |
| Luis Garcia-Garcia, Jose; Santos-Moreno, Antonio | 2014 | Seasonal variation in the diversity and composition of phyllostomid bat assemblages in continuous and fragmented forests in Los Chimalapas, Oaxaca, Mexico | REVISTA MEXICANA DE BIODIVERSIDAD | 85 | 228 | 241 | Fragmentación | Mamíferos | Chimalapas | Oaxaca | tropical |
| Mendez-Toribio, Moises; Zermeno-Hernandez, Isela; Ibarra-Manriquez, Guillermo | 2014 | Effect of land use on the structure and diversity of riparian vegetation in the Duero river watershed in Michoacan, Mexico | PLANT ECOLOGY | 215 | 285 | 296 | Modificación / cambio de uso de suelo | Varios | Río Duero | Michoacán | Humedal |
| Renato Ramos-Palacios, Carlos; Badano, Ernesto I. | 2014 | The relevance of burial to evade acorn predation in an oak forest affected by habitat loss and land use changes | BOTANICAL SCIENCES | 92 | 299 | 308 | Modificación / cambio de uso de suelo | Plantas | Monte Caldera | San Luis Potosí | semiárido |
| Uribe, David; Geneletti, Davide; del Castillo, Rafael F.; Orsi, Francesco | 2014 | Integrating Stakeholder Preferences and GIS-Based Multicriteria Analysis to Identify Forest Landscape Restoration Priorities | SUSTAINABILITY | 6 | 935 | 951 | Restauración - Sucesión ecológica | N/A |  | Oaxaca | varios |
| Vallejo, Mariana; Casas, Alejandro; Blancas, Jose; Moreno-Calles, Ana I.; Solis, Leonor; Rangel-Landa, Selene; Davila, Patricia; Tellez, Oswaldo | 2014 | Agroforestry systems in the highlands of the Tehuacan Valley, Mexico: indigenous cultures and biodiversity conservation | AGROFORESTRY SYSTEMS | 88 | 125 | 140 | Agroforestería | Plantas | Tehuacán-Cuicatlán-Zapotitlán | Puebla | árido |
| Cortes-Marcial, M.; Martinez Ayon, Y. M.; Briones-Salas, M. | 2014 | Diversity of large and medium mammals in Juchitan, Isthmus of Tehuantepec, Oaxaca, Mexico | ANIMAL BIODIVERSITY AND CONSERVATION | 37 | 1 | 12 | Distribución | Mamíferos | Istmo de Tehuantepec | Oaxaca | tropical |
| Hernandez-Ordonez, Omar; Martinez-Ramos, Miguel; Arroyo-Rodriguez, Victor; Gonzalez-Hernandez, Adriana; Gonzalez-Zamora, Arturo; Zarate, Diego A.; Hugo Reynoso, Victor | 2014 | Distribution and conservation status of amphibian and reptile species in the Lacandona rainforest, Mexico: an update after 20 years of research | TROPICAL CONSERVATION SCIENCE | 7 | 1 | U190 | Distribución | Anfibios y reptiles | Lacandona | Chiapas | tropical |
| Pablo Ramirez-Delgado, Juan; Christman, Zachary; Schmook, Birgit | 2014 | Deforestation and fragmentation of seasonal tropical forests in the southern Yucatan, Mexico (1990-2006) | GEOCARTO INTERNATIONAL | 29 | 822 | 841 | Modificación / cambio de uso de suelo | N/A | Calakmul | Varios | tropical |
| Paulo Carbajal-Borges, Juan; Godinez-Gomez, Oscar; Mendoza, Eduardo | 2014 | Density, abundance and activity patterns of the endangered Tapirus bairdii in one of its last strongholds in southern Mexico | TROPICAL CONSERVATION SCIENCE | 7 | 100 | 114 | Uso de hábitat | Mamíferos | Sureste de México | Chiapas | tropical |
| Petracca, Lisanne S.; Eric Ramirez-Bravo, O.; Hernandez-Santin, Lorna | 2014 | Occupancy estimation of jaguar Panthera onca to assess the value of east-central Mexico as a jaguar corridor | ORYX | 48 | 133 | 140 | Distribución | Mamíferos | Centro de México | Puebla | tropical |
| Arroyo-Rodriguez, Victor; Gonzalez-Perez, Iraida M.; Garmendia, Adriana; Sola, Mireia; Estrada, Alejandro | 2013 | The relative impact of forest patch and landscape attributes on black howler monkey populations in the fragmented Lacandona rainforest, Mexico | LANDSCAPE ECOLOGY | 28 | ### | ### | Fragmentación | Mamíferos | Lacandona | Chiapas | tropical |
| Ruiz-Guerra, B.; Hanson, P.; Guevara, R.; Dirzo, R. | 2013 | Richness and Abundance of Ichneumonidae in a Fragmented Tropical Rain Forest | NEOTROPICAL ENTOMOLOGY | 42 | 458 | 465 | Fragmentación | Invertebrados | Los Tuxtlas | Veracruz | tropical |
| Garrido-Garduno, Tania; Vazquez-Dominguez, Ella | 2013 | Genetic, spatial and connectivity methods of analysis in landscape genetics | REVISTA MEXICANA DE BIODIVERSIDAD | 84 | ### | ### | Genética del paisaje | N/A | N/A | N/A | N/A |
| Torres, Eduardo; Alvarez, Fernando; Botello, Alejandro | 2013 | Genetic variation in Procambarus llamasi (Crustacea: Decapoda: Cambaridae) from the Yucatan Peninsula: evidence of connectivity in a fragmented landscape | LATIN AMERICAN JOURNAL OF AQUATIC RESEARCH | 41 | 762 | 772 | Genética del paisaje | Invertebrados | Campeche, Yucatán y Quintana Roo | Yucatán | Marino |
| Luisa Herrera-Arroyo, M.; Sork, Victoria L.; Gonzalez-Rodriguez, Antonio; Rocha-Ramirez, Victor; Vega, Ernesto; Oyama, Ken | 2013 | Seed-mediated connectivity among fragmented populations of Quercus castanea (Fagaceae) in a mexican landscape | AMERICAN JOURNAL OF BOTANY | 100 | ### | ### | Conectividad | Plantas | Cuitzeo | Michoacán | Humedal |
| Pozo-Montuy, Gilberto; Carlos Serio-Silva, Juan; Chapman, Colin A.; Bonilla-Sanchez, Yadira M. | 2013 | Resource Use in a Landscape Matrix by an Arboreal Primate: Evidence of Supplementation in Black howlers (Alouatta pigra) | INTERNATIONAL JOURNAL OF PRIMATOLOGY | 34 | 714 | 731 | Fragmentación | Mamíferos | Balancán | Tabasco | tropical |
| Jose Romero, Maria; Quezada-Euan, Jose Javier G. | 2013 | Pollinators in biofuel agricultural systems: the diversity and performance of bees (Hymenoptera: Apoidea) on Jatropha curcas in Mexico | APIDOLOGIE | 44 | 419 | 429 | Servicios ecosistémicos | Invertebrados | México (País) | Varios | varios |
| Arellano, Lucrecia; Leon-Cortes, Jorge L.; Halffter, Gonzalo; Montero, Jorge | 2013 | Acacia woodlots, cattle and dung beetles (Coleoptera: Scarabaeinae) in a Mexican silvopastoral landscape | REVISTA MEXICANA DE BIODIVERSIDAD | 84 | 650 | 660 | Modificación / cambio de uso de suelo | Invertebrados | San Fernando | Chiapas | tropical |
| Macip-Rios, Rodrigo; Lopez-Alcaide, Saul; Munoz-Alonso, Antonio | 2013 | Abundance, habitat, microhabitat use, and time of activity of Ameiva undulata (Squamata: Teidae) in a fragmented landscape in the Chiapas Soconusco | REVISTA MEXICANA DE BIODIVERSIDAD | 84 | 622 | 629 | Uso de hábitat | Reptiles | Mapastepec | Chiapas | tropical |
| Tetetla-Rangel, Erika; Luis Hernandez-Stefanoni, Jose; Manuel Dupuy, Juan | 2013 | Patterns of rare woody species richness: the influence of environment, landscape attributes and spatial structure across different spatial scales | BIODIVERSITY AND CONSERVATION | 22 | ### | ### | Fragmentación | Plantas | Península de Yucatán | Varios | tropical |
| Rodriguez-Oseguera, A. G.; Casas, A.; Herrerias-Diego, Y.; Perez-Negron, E. | 2013 | Effect of habitat disturbance on pollination biology of the columnar cactus Stenocereus quevedonis at landscape-level in central Mexico | PLANT BIOLOGY | 15 | 573 | 582 | Modificación / cambio de uso de suelo | Plantas | Zicuirán - Infiernillo | Michoacán | semiárido |
| Saldana-Vazquez, Romeo A.; Castro-Luna, Alejandro A.; Sandoval-Ruiz, Cesar A.; Hernandez-Montero, Jesus R.; Stoner, Kathryn E. | 2013 | Population Composition and Ectoparasite Prevalence on Bats (Sturnira ludovici; Phyllostomidae) in Forest Fragments and Coffee Plantations of Central Veracruz, Mexico | BIOTROPICA | 45 | 351 | 356 | Agroecosistemas | Mamíferos | Xalapa | Veracruz | mesófilo |
| Amador-Alcala, Saul; Naranjo, Eduardo J.; Jimenez-Ferrer, Guillermo | 2013 | Wildlife predation on livestock and poultry: implications for predator conservation in the rainforest of south-east Mexico | ORYX | 47 | 243 | 250 | Uso de hábitat | Varios | Calakmul y Lacandona | Varios | tropical |
| Meli, Paula; Dirzo, Rodolfo | 2013 | Effects of grasses on sapling establishment and the role of transplanted saplings on the light environment of pastures: implications for tropical forest restoration | APPLIED VEGETATION SCIENCE | 16 | 296 | 304 | Restauración - Sucesión ecológica | Plantas | Los Tuxtlas | Veracruz | tropical |
| Gonzalez-Valdivia, Noel A.; Gonzalez-Escolastico, Gabriela; Barba, Everardo; Hernandez-Daumas, Salvador; Ochoa-Gaona, Susana | 2013 | Mirmecofauna associated with agroforestry systems in the Mesoamerican Biological Corridor in Tabasco, Mexico | REVISTA MEXICANA DE BIODIVERSIDAD | 84 | 306 | 317 | Modificación / cambio de uso de suelo | Invertebrados | Tabasco | Tabasco | tropical |
| Castellanos, Edwin J.; Tucker, Catherine; Eakin, Hallie; Morales, Helda; Barrera, Juan F.; Diaz, Rafael | 2013 | Assessing the adaptation strategies of farmers facing multiple stressors: Lessons from the Coffee and Global Changes project in Mesoamerica | ENVIRONMENTAL SCIENCE & POLICY | 26 | 19 | 28 | Agroforestería | N/A | México y otros países | N/A | tropical |
| Chavez-Zichinelli, Carlos A.; MacGregor-Fors, Ian; Quesada, Javier; Rohana, Patricia Talamas; Romano, Marta C.; Valdez, Ricardo; Schondube, Jorge E. | 2013 | How stressed are birds in an uranizing landscape? Relationships between the physiology of birds and three levels of habitat alteration | CONDOR | 115 | 84 | 92 | Ecología urbana | Aves | Cuitzeo | Michoacán | urbano |
| Marinidou, Eleni; Finegan, Bryan; Jimenez-Ferrer, Guillermo; Delgado, Diego; Casanoves, Fernando | 2013 | Concepts and a methodology for evaluating environmental services from trees of small farms in Chiapas, Mexico | JOURNAL OF ENVIRONMENTAL MANAGEMENT | 114 | 115 | 124 | Servicios ecosistémicos | Plantas | Lacandona | Chiapas | tropical |
| Monterroso-Rivas, Alejandro I.; Gomez-Diaz, Jesus D.; Tinoco-Rueda, Juan A. | 2013 | Cloud forest and climate change scenarios: an assessment in Hidalgo, México | REVISTA CHAPINGO SERIE CIENCIAS FORESTALES Y DEL AMBIENTE | 19 | 29 | 43 | Cambio climático | Plantas | Hidalgo | Hidalgo | mesófilo |
| Bolivar-Cime, Beatriz; Laborde, Javier; MacSwiney G., M. Cristina; Munoz-Robles, Carlos; Tun-Garrido, Juan | 2013 | Response of phytophagous bats to patch quality and landscape attributes in fragmented tropical semi-deciduous forest | ACTA CHIROPTEROLOGICA | 15 | 399 | 409 | Fragmentación | Mamíferos | Buctzotz, Espita y Tunka | Yucatán | tropical |
| Delgado-Balbuena, J.; Arredondo, J. T.; Loescher, H. W.; Huber-Sannwald, E.; Chavez-Aguilar, G.; Luna-Luna, M.; Barretero-Hernandez, R. | 2013 | Differences in plant cover and species composition of semiarid grassland communities of central Mexico and its effects on net ecosystem exchange | BIOGEOSCIENCES | 10 | ### | ### | Ecología ecosistémica | Plantas | Llanos de ojuelos | Jalisco | semiárido |
| Garcia-Marmolejo, G.; Chapa-Vargas, L.; Huber-Sannwald, E.; Weber, M.; Rosas-Rosas, O. C.; Martinez-Calderas, J. | 2013 | Potential distributional patterns of three wild ungulate species in a fragmented tropical region of northeastern Mexico | TROPICAL CONSERVATION SCIENCE | 6 | 539 | 557 | Distribución | Mamíferos | Huasteca | San Luis Potosí | tropical |
| Gonzalez-Zamorano, Patricia; Lluch-Cota, Salvador E.; Nava-Sanchez, Enrique H. | 2013 | Relation between the Structure of Mangrove Forests and Geomorphic Types of Lagoons of the Baja California Peninsula | JOURNAL OF COASTAL RESEARCH | 29 | 173 | 181 | Distribución | Plantas | Baja California | Varios | Costero |
| Jesus Ramirez-Barajas, Pablo; Islebe, Gerald A.; Torrescano-Valle, Nuria | 2012 | Post-hurricane Dean impact on habitat and its influence on the relative abundance of large vertebrates in the Selva Maya, Quintana Roo, Mexico | REVISTA MEXICANA DE BIODIVERSIDAD | 83 | ### | ### | Modificación / cambio de uso de suelo | Vertebrados | Selva Maya | Quintana Roo | tropical |
| Villegas-Patraca, Rafael; MacGregor-Fors, Ian; Ortiz-Martinez, Teresa; Perez-Sanchez, Clara E.; Herrera-Alsina, Leonel; Munoz-Robles, Carlos | 2012 | Bird -community shifts in relation to wind farms: A case study comparing a wind farm, croplands, and secondary forest in southern México | CONDOR | 114 | 711 | 719 | Modificación / cambio de uso de suelo | Aves | Istmo de Tehuantepec | Oaxaca | tropical |
| Rivera-Rivera, Emerenciano; Enriquez, Paula L.; Flamenco-Sandoval, Alejandro; Luis Rangel-Salazar, Jose | 2012 | Occupancy and abundance of nocturnal raptors (Strigidae) in the Selva El Ocote Biosphere Reserve, Chiapas, Mexico | REVISTA MEXICANA DE BIODIVERSIDAD | 83 | 742 | 752 | Distribución | Aves | El Ocote | Chiapas | tropical |
| van der Wal, Hans; Pena-Alvarez, Beatriz; Arriaga-Weiss, Stefan L.; Hernandez-Daumas, Salvador | 2012 | Species functinal groups, and habitat preferences of birds in five agroforestry classes in Tabasco, Mexico | WILSON JOURNAL OF ORNITHOLOGY | 124 | 558 | 571 | Modificación / cambio de uso de suelo | Aves | Tabasco | Tabasco | tropical |
| Ochoa, Alexander; Gasca, Jaime; Ceballos, Gerardo J.; Eguiarte, Luis E. | 2012 | Spatiotemporal population genetics of the endangered Perote ground squirrel (Xerospermophilus perotensis) in a fragmented landscape | JOURNAL OF MAMMALOGY | 93 | ### | ### | Genética del paisaje | Mamíferos | Puebla y Veracruz | Varios | semiárido |
| Anaya, Carlos A.; Jaramillo, Victor J.; Martinez-Yrizar, Angelina; Garcia-Oliva, Felipe | 2012 | Large Rainfall Pulses Control Litter Decomposition in a Tropical Dry Forest: Evidence from an 8-Year Study | ECOSYSTEMS | 15 | 652 | 663 | Ecología ecosistémica | N/A | Chamela - Cuixmala | Jalisco | tropical |
| Garcia-Romero, Arturo; Aceves-Quesada, Jose Fernando; Arredondo-Leon, Carlos | 2012 | Landform instability and land-use dynamics in tropical high mountains, Central Mexico | JOURNAL OF MOUNTAIN SCIENCE | 9 | 414 | 430 | Modificación / cambio de uso de suelo | N/A | Centro de México | Michoacán | montaña |
| HERNÁNDEZ-LADRÓN DE GUEVARA, IVETTE; ROJAS-SOTO, OCTAVIO R; LÓPEZ-BARRERA, FABIOLA; PUEBLA-OLIVARES, FERNANDO; DÍAZ-CASTELAZO, CECILIA | 2012 | Seed dispersal by birds in a cloud forest landscape in central Veracruz, Mexico: Its role in passive restoration | Revista chilena de historia natural | 85 | 89 | 100 | Restauración - Sucesión ecológica | Aves | Huatusco | Veracruz | mesófilo |
| Rioja-Nieto, R.; Chiappa-Carrara, X.; Sheppard, C. | 2012 | Effects of hurricanes on the stability of reef-associated landscapes | CIENCIAS MARINAS | 38 | 47 | 55 | Modificación / cambio de uso de suelo | N/A | Cozumel | Quintana Roo | Marino |
| Parra-Olea, G.; Zamudio, K. R.; Recuero, E.; Aguilar-Miguel, X.; Huacuz, D.; Zambrano, L. | 2012 | Conservation genetics of threatened Mexican axolotls (Ambystoma) | ANIMAL CONSERVATION | 15 | 61 | 72 | Genética del paisaje | Anfibios | Xochimilco, Chapultepec | Estado de México | Humedal |
| Adan Caballero-Vazquez, Jose; Eugenia Vega-Cendejas, Maria | 2012 | Spatial patterns of diversity at local and regional scales in a tropical lagoon | NEOTROPICAL ICHTHYOLOGY | 10 | 99 | 108 | Distribución | Varios | Cancún | Quintana Roo | Humedal |
| Castillo, M. M.; Morales, H.; Valencia, E.; Morales, J. J.; Cruz-Motta, J. J. | 2012 | The effects of human land use on flow regime and water chemistry of headwater streams in the highlands of Chiapas | KNOWLEDGE AND MANAGEMENT OF AQUATIC ECOSYSTEMS | |  |  | Modificación / cambio de uso de suelo | N/A | Los Altos de Chiapas | Chiapas | Humedal |
| Castro-Luna, Alejandro A.; Galindo-Gonzalez, Jorge | 2012 | Seed dispersal by phyllostomid bats in two contrasting vegetation types in a Mesoamerican reserve | ACTA CHIROPTEROLOGICA | 14 | 133 | 142 | Restauración - Sucesión ecológica | Mamíferos | Parque Agua Blanca | Tabasco | tropical |
| Newton, Adrian C.; del Castillo, Rafael F.; Echeverria, Cristian; Geneletti, Davide; Gonzalez-Espinosa, Mario; Malizia, Lucio R.; Premoli, Andrea C.; Rey Benayas, Jose M.; Smith-Ramirez, Cecilia; Williams-Linera, Guadalupe | 2012 | Forest Landscape Restoration in the Drylands of Latin America | ECOLOGY AND SOCIETY | 17 |  |  | Restauración - Sucesión ecológica | Plantas | México y otros países | Varios | árido |
| Hernandez Guzman, Rafael; Ruiz Luna, Arturo; Berlanga Robles, Cesar Alejandro | 2011 | CN-Idris: An Idrisi tool for generating curve number maps and estimating direct runoff | ENVIRONMENTAL MODELLING & SOFTWARE | 26 | ### | ### | Ecología ecosistémica | N/A | N/A | N/A | N/A |
| Rita Roman-Jimenez, Ana; Alfonso Mendoza-Briseno, Martin; Velazquez-Martinez, Alejandro; Roberto Martinez-Menez, Mario; Manuel Torres-Rojo, Juan; Ramirez-Maldonado, Hugo | 2011 | Water uses and risks in La Antigua watershed, Veracruz, Mexico | MADERA Y BOSQUES | 17 | 29 | 48 | Servicios ecosistémicos | N/A | Veracruz | Veracruz | Humedal |
| Hallett, Justin T.; Diaz-Calvo, Javier; Villa-Castillo, Jaime; Wagner, Michael R. | 2011 | Teak Plantations: Economic Bonanza or Environmental Disaster? | JOURNAL OF FORESTRY | 109 | 288 | 292 | Agroforestería | Plantas | Costa del Pacífico de México | Varios | varios |
| Riojas-Lopez, Monica E.; Mellink, Eric; Raoul, Francis; Luevano, Jaime; Vaniscotte, Amelie; Giraudoux, Patrick | 2011 | Landscape partitioning by nocturnal rodent assemblages in the Llanos de Ojuelos, in Mexico's Central High Plateau | DIVERSITY AND DISTRIBUTIONS | 17 | 739 | 747 | Distribución | Mamíferos | Centro de México | Varios | semiárido |
| Palacio-Aponte, Gerardo | 2010 | Coastal post-hurricane mofphology as an indicator of the intensity threat of hurricanes | INTERCIENCIA | 36 | 400 | 406 | Modificación / cambio de uso de suelo | N/A |  | Campeche | Costero |
| Campos Sanchez, Minerva; Velazquez Montes, Alejandro; Bocco Verdinelli, Gerardo; Boada Junca, Marti; Guadalupe Priego-Santander, Angel | 2010 | Defining environmental managements units based upon integrated socio-economicand biophysical indicators at the pacific coast of México | INTERCIENCIA | 35 | 33 | 40 | Conservación y manejo | N/A | Oeste de México | Michoacán | Costero |
| Coronel Arellano, Heli; Lopez Gonzalez, Carlos A.; Moreno Arzate, Claudia N. | 2009 | Can landscape variables can predict the abundance of whitetail deer? The case of northwestern Mexico | TROPICAL CONSERVATION SCIENCE | 2 | 229 | 236 | Uso de hábitat | Mamíferos | Noroeste de México | Sonora | semiárido |
| Ruvalcaba-Ortega, Irene; Gonzalez-Rojas, Jose I.; Canales-del Castillo, Ricardo | 2008 | RIPARIAN BIRD COMMUNITY FROM THE RIO SABINAS, COAHUILA, MEXICO | TEXAS JOURNAL OF SCIENCE | 60 | 243 | 260 | Uso de hábitat | Aves | Río Sabinas | Coahuila | Ribereño |
| Serio-Silva, C.; Pozo-Montuy, G.; Bonilla-Sanchez, Y. | 2008 | Black howler monkey (Alouatta pigra) populations in a regional landscape: Low basin of usumacinta river at southern of Mexico | AMERICAN JOURNAL OF PRIMATOLOGY | 70 | 48 | 48 | Distribución | Mamíferos | Sureste de México | Tabasco | tropical |
| Mandujano, S.; Escobedo-Morales, L.; Palacios, R.; Rodriguez-Toledo, E. | 2004 | A metapopulation approach to conservation of howler monkeys in highly altered landscapes in Mexico: Increase patch size or set up inter-patch connectivity? | AMERICAN JOURNAL OF PRIMATOLOGY | 62 | 78 | 79 | Fragmentación | Mamíferos | Los Tuxtlas | Veracruz | tropical |
| Rodriguez-Estrella, R; Careaga, AP | 2003 | The western screech-owl and habitat alteration in Baja California: a gradient from urban and rural landscapes to natural habitat | CANADIAN JOURNAL OF ZOOLOGY-REVUE CANADIENNE DE ZOOLOGIE | 81 | 916 | 922 | Modificación / cambio de uso de suelo | Aves | Baja california | Baja california | varios |
| Maldonado-Lopez, Yurixhi; Cuevas-Reyes, Pablo; Oyama, Ken | 2016 | Diversity of gall wasps (Hymenoptera: Cynipidae) associated with oak trees (Fagaceae: Quercus) in a fragmented landscape in Mexico | ARTHROPOD-PLANT INTERACTIONS | 10 | 29 | 39 | Fragmentación | Plantas | | Michoacán | Montaña |
| Garcia-Martinez, Miguel A.; Escobar-Sarria, Federico; Lopez-Barrera, Fabiola; Castano-Meneses, Gabriela; Valenzuela-Gonzalez, Jorge E. | 2015 | Value of Riparian Vegetation Remnants for Leaf-Litter Ants (Hymenoptera: Formicidae) in a Human-Dominated Landscape in Central Veracruz, Mexico | ENVIRONMENTAL ENTOMOLOGY | 44 | ### | ### | Uso de hábitat | Invertebrados | | Veracruz | ribereño |
| Rubio, Andre V.; Vigueras-Galvan, Ana L.; Schountz, Tony; Moreno-Torres, Karla; List, Rurik; Sarrniento-Silva, Rosa E.; Avila-Flores, Rafael; Suzan, Gerardo | 2015 | Abundance of hantavirus hosts in a landscape with black-tailed prairie dog colonies in northwestern Mexico | MAMMALIAN BIOLOGY | 80 | 491 | 495 | Distribución | Varios | | Chihuahua | árido |
| Garcia-Martinez, Miguel A.; Martinez-Tlapa, Dora L.; Perez-Toledo, Gibran R.; Quiroz-Robledo, Luis N.; Castano-Meneses, Gabriela; Laborde, Javier; Valenzuela-Gonzalez, Jorge E. | 2015 | Taxonomic, species and functional group diversity of ants in a tropical anthropogenic landscape | TROPICAL CONSERVATION SCIENCE | 8 | ### | ### | Distribución | Invertebrados | | Veracruz | tropical |
| Sunny, Armando; Monroy-Vilchis, Octavio; Zarco-Gonzalez, Martha M.; David Mendoza-Martinez, German; Martinez-Gomez, Daniel | 2015 | Genetic diversity and genetic structure of an endemic Mexican Dusky Rattlesnake (Crotalus triseriatus) in a highly modified agricultural landscape: implications for conservation | GENETICA | 143 | 705 | 716 | Agroecosistemas | Reptiles | | Estado de México | urbano |
| Antonio Lopez-Cancino, Sury; Tun-Ku, Ezequiel; Keynes De la Cruz-Felix, Himmler; Napoleon Ibarra-Cerdena, Carlos; Izeta-Alberdi, Amaia; Pech-May, Angelica; Jesus Mazariegos-Hidalgo, Carlos; Valdez-Tah, Alba; Ramsey, Janine M. | 2015 | Landscape ecology of Trypanosoma cruzi in the southern Yucatan Peninsula | ACTA TROPICA | 151 | 58 | 72 | Medicina de la conservación | Protozoo | | Campeche | tropical |
| De Farias, Patricia Menegaz; Arellano, Lucrecia; Medina Hernandez, Malva Isabel; Lopez Ortiz, Silvia | 2015 | Response of the copro-necrophagous beetle (Coleoptera: Scarabaeinae) assemblage to a range of soil characteristics and livestock management in a tropical landscape | JOURNAL OF INSECT CONSERVATION | 19 | 947 | 960 | Uso de hábitat | Invertebrados | | Veracruz | tropical |
| Avila-Gomez, Eva S.; Moreno, Claudia E.; Garcia-Morales, Rodrigo; Zuria, Iriana; Sanchez-Rojas, Gerardo; Briones-Salas, Miguel | 2015 | Deforestation thresholds for phyllostomid bat populations in tropical landscapes in the Huasteca region, Mexico | TROPICAL CONSERVATION SCIENCE | 8 | 646 | 661 | Modificación / cambio de uso de suelo | Mamíferos | | Hidalgo | tropical |
| Pena-Ramirez, Victor; Vazquez-Selem, Lorenzo; Siebe, Christina | 2015 | Rates of pedogenic processes in volcanic landscapes of late Pleistocene to Holocene age in Central Mexico | QUATERNARY INTERNATIONAL | 376 | 19 | 33 | Modificación / cambio de uso de suelo | N/A |  | Estado de México | montaña |
| Reyes Gomez, Victor Manuel; Viramontes Olivas, Oscar; Arredondo Moreno, Jose Tulio; Huber Sannwald, Elisabeth; Rangel Rodriguez, Alfredo | 2015 | Functional ecohydrological differences among native and exotic grassland covers in sub-urban landscapes of Chihuahua city, Mexico | LANDSCAPE AND URBAN PLANNING | 139 | 54 | 62 | Ecología ecosistémica | Plantas | | Chihuahua | urbano |
| Zambrano, Jenny; Coates, Rosamond; Howe, Henry F. | 2015 | Seed predation in a human-modified tropical landscape | JOURNAL OF TROPICAL ECOLOGY | 31 | 379 | 383 | Modificación / cambio de uso de suelo | Plantas | | Veracruz | tropical |
| Suazo-Ortuno, Ireri; Alvarado-Diaz, Javier; Mendoza, Eduardo; Lopez-Toledo, Leonel; Lara-Uribe, Nancy; Marquez-Camargo, Cesar; Gil Paz-Gutierrez, Jose; David Rangel-Orozco, Jorge | 2015 | High resilience of herpetofaunal communities in a human-modified tropical dry forest landscape in western Mexico | TROPICAL CONSERVATION SCIENCE | 8 | 396 | 423 | Modificación / cambio de uso de suelo | Anfibios y Reptiles | | Jalisco | tropical |
| Carrara, Emilia; Arroyo-Rodriguez, Victor; Vega-Rivera, Jorge H.; Schondube, Jorge E.; de Freitas, Sandra M.; Fahrig, Lenore | 2015 | Impact of landscape composition and configuration on forest specialist and generalist bird species in the fragmented Lacandona rainforest, Mexico | BIOLOGICAL CONSERVATION | 184 | 117 | 126 | Fragmentación | Aves |  | Chiapas | tropical |
| Hernandez-SaintMartin, Anuar D.; Rosas-Rosas, Octavio C.; Palacio-Nunez, Jorge; Clemente-Sanchez, Fernando; Hoogesteijn, Almira L. | 2015 | Food Habits of Jaguar and Puma in a Protected Area and Adjacent Fragmented Landscape of Northeastern Mexico | NATURAL AREAS JOURNAL | 35 | 308 | 317 | Uso de hábitat | Mamíferos | | San Luis Potosí | tropical |
| De la Mora, A.; Garcia-Ballinas, J. A.; Philpott, S. M. | 2015 | Local, landscape, and diversity drivers of predation services provided by ants in a coffee landscape in Chiapas, Mexico | AGRICULTURE ECOSYSTEMS & ENVIRONMENT | 201 | 83 | 91 | Agroecosistemas | Invertebrados | | Chiapas | tropical |
| Maya-Elizarraras, Elisa; Schondube, Jorge E. | 2015 | Birds, Cattle, and Bracken Ferns: Bird Community Responses to a Neotropical Landscape Shaped by Cattle Grazing Activities | BIOTROPICA | 47 | 236 | 245 | Modificación / cambio de uso de suelo | Aves |  | Puebla | tropical |
| Skutsch, M.; Borrego, A.; Morales-Barquero, L.; Paneque-Galvez, J.; Salinas-Melgoza, M.; Ramirez, M. I.; Perez-Salicrup, D.; Benet, D.; Monroy, S.; Gao, Y. | 2015 | Opportunities, constraints and perceptions of rural communities regarding their potential to contribute to forest landscape transitions under REDD plus : case studies from Mexico | INTERNATIONAL FORESTRY REVIEW | 17 | 65 | 84 | Conservación y manejo | N/A |  | Michoacán | Montaña |
| Christman, Z.; Pearsall, H.; Schmook, B.; Mardero, S. | 2015 | Diversification and adaptive capacity across scales in an emerging post-frontier landscape of the Usumacinta Valley, Chiapas, Mexico | INTERNATIONAL FORESTRY REVIEW | 17 | 111 | 123 | Modificación / cambio de uso de suelo | N/A |  | Chiapas | tropical |
| de la Pena-Cuellar, Erika; Benitez-Malvido, Julieta; Daniel Avila-Cabadilla, Luis; Martinez-Ramos, Miguel; Estrada, Alejandro | 2015 | Structure and diversity of phyllostomid bat assemblages on riparian corridors in a human-dominated tropical landscape | ECOLOGY AND EVOLUTION | 5 | 903 | 913 | Uso de hábitat | Mamíferos | | Chiapas | tropical |
| Rico Chavez, Oscar; Ojeda Flores, Rafael; Sotomayor Bonilla, Jesus; Zambrana-Torrelio, Carlos; Loza Rubio, Elizabeth; Alonso Aguirre, A.; Suzan, Gerardo | 2015 | Viral diversity of bat communities in human-dominated landscapes in Mexico. | Veterinaria Mexico | 2 | 1 | 22 | Medicina de la conservación | Mamíferos y virus | Chiapas, Estado de México y Campeche | Varios | tropical y urbano |
| Carlon-Allende, Teodoro; Mendoza, Manuel E.; Villanueva-Diaz, Jose; Perez-Salicrup, Diego R. | 2015 | Landscape spatial analysis as a base for dendrochronological sampling: The case of the Biosphere Reserve of Monarch Butterfly, Mexico | MADERA Y BOSQUES | 21 | 11 | 22 | Métodos de análisis | N/A |  | Michoacán | Montaña |
| Solorzano-Gordillo, E. de J.; Cabrera-Marin, N. V.; Merida, J.; Vandame, R.; Sanchez, D. | 2015 | GENETIC DIVERSITY OF TWO STINGLESS BEES, TRIGONA NIGERRIMA (CRESSON 1878) AND TRIGONA CORVINA (COCKERELL 1913), IN COFFEE DOMINATED LANDSCAPES IN SOUTHERN MEXICO | Acta Zoologica Mexicana Nueva Serie | 31 | 74 | 79 | Agroecosistemas | Invertebrados | | Chiapas | tropical |
| Manjarrez-Dominguez, Carlos; Pinedo-Alvarez, Alfredo; Pinedo-Alvarez, Carmelo; Villarreal-Guerrero, Federico; Cortes-Palacios, Leonor | 2015 | Vegetation landscape analysis due to land use changes on arid lands | POLISH JOURNAL OF ECOLOGY | 63 | 167 | 174 | Modificación / cambio de uso de suelo | N/A |  | Chihuahua | árido |
| Ordonez-Gomez, Jose D.; Arroyo-Rodriguez, Victor; Nicasio-Arzeta, Sergio; Cristobal-Azkarate, Jurgi | 2015 | Which is the Appropriate Scale to Assess the Impact of Landscape Spatial Configuration on the Diet and Behavior of Spider Monkeys? | AMERICAN JOURNAL OF PRIMATOLOGY | 77 | 56 | 65 | Fragmentación | Mamíferos | | Chiapas | tropical |
| Maldonado-Lopez, Yurixhi; Cuevas-Reyes, Pablo; Gonzalez-Rodriguez, Antonio; Perez-Lopez, Griselda; Acosta-Gomez, Carlos; Oyama, Ken | 2015 | Relationships among plant genetics, phytochemistry and herbivory patterns in Quercus castanea across a fragmented landscape | ECOLOGICAL RESEARCH | 30 | 133 | 143 | Fragmentación | Plantas | | Michoacán | Montaña |
| Maya-Elizarraras, Elisa; Schondube, Jorge E. | 2015 | Birds, charcoal and cattle: Bird community responses to human activities in an oak forest landscape shaped by charcoal extraction | FOREST ECOLOGY AND MANAGEMENT | 335 | 118 | 128 | Uso de hábitat | Aves |  | Michoacán | Montaña |
|  |  |  |  |  |  |  |  |  |  |  |  |
| **Excluidos de la revisión** | | | | | | | | | | | |
|  |  |  |  |  |  |  |  |  |  |  |  |
| Weimerskirch, H; Shaffer, SA; Tremblay, Y; Costa, DP; Gadenne, H; Kato, A; Ropert-Coudert, Y; Sato, K; Aurioles, D | 2009 | Species- and sex-specific differences in foraging behaviour and foraging zones in blue-footed and brown boobies in the Gulf of California | MARINE ECOLOGY PROGRESS SERIES | 391 | 267 | 278 | Calidad del hábitat | Aves | Isla San Ildefonso, Golfo de California | Baja california | semiárido |
| Herrera-Silveira, JA; Morales-Ojeda, SM | 2009 | Evaluation of the health status of a coastal ecosystem in southeast Mexico: Assessment of water quality, phytoplankton and submerged aquatic vegetation | MARINE POLLUTION BULLETIN | 59 | 72 | 86 | Calidad del hábitat | N/A | Sureste de México | Yucatán | Marino |
| Conde, DA; Colchero, F; Zarza, H; Christensen, NLJ; Sexton, JO; Manterola, C; Chavez, C; Rivera, A; Azuara, D; Ceballos, G | 2010 | Sex matters: Modeling male and female habitat differences for jaguar conservation | BIOLOGICAL CONSERVATION | 143 | ### | ### | Calidad del hábitat | Mamíferos | Belize, México (Campeche y Quintana Roo), Guatemala | Varios | tropical |
| Leon-Cortes, J; Perez-Espinoza, F; Marin, L; Molina-Martinez, A | 2004 | Complex habitat requirements and conservation needs of the only extant Baroniinae swallowtail butterfly | ANIMAL CONSERVATION | 7 | 241 | 250 | Calidad del hábitat | Invertebrados | San Fernando | Chiapas | tropical |
| Velazquez, A; Heil, GW | 1996 | Habitat suitability study for the conservation of the volcano rabbit (Romerolagus diazi) | JOURNAL OF APPLIED ECOLOGY | 33 | 543 | 554 | Calidad del hábitat | Mamíferos | Centro de México | Varios | templado |
| Gabriela Ortiz-Maciel, Sonia; Hori-Ochoa, Consuelo; Enkerlin-Hoeflich, Ernesto | 2010 | Maroon-fronted parrot (Rhynchopsitta terrisi) breeding home range and habitat selection in the northern Sierra Madre Oriental, México | WILSON JOURNAL OF ORNITHOLOGY | 122 | 513 | 517 | Calidad del hábitat | Aves | Sierra Madre Oriental | Varios | templado |
| Arellano, Elizabeth; Castro-Arellano, Ivan; Suzan, Gerardo; Gonzalez-Cozatl, Francisco X.; Morales Jimenez, Ricardo | 2012 | Antibody seroprevalence to hantaviruses in rodents from Reserva de la Biosfera Huautla, Morelos | WESTERN NORTH AMERICAN NATURALIST | 72 | 105 | 109 | Calidad del hábitat | Mamíferos | Reserva de la Biosfera Huautla | Morelos | tropical |
| Sosa-Ramirez, Joaquin; Moreno-Rico, Onesimo; Sanchez-Martinez, Guillermo; Elena Siqueiros-Delgado, Maria; Diaz-Nunez, Vicente | 2011 | Ecology and phytosanitary condition of oak trees in the (Quercus spp.) in the Sierra Fria range, Aguascalientes, Mexico | MADERA Y BOSQUES | 17 | 49 | 63 | Calidad del hábitat | Plantas | Sierra Fría | Aguascalientes | templado |
| Perez-Sanchez, Clara E.; Villegas-Patraca, Rafael; MacGregor-Fors, Ian | 2011 | DETAILED DESCRIPTION OF THE NEST, EGGS, AND NESTING HABITAT OF THE MICRO-ENDEMIC, NEAR THREATENED ROSE-BELLIED BUNTING (PASSERINA ROSITAE) | ORNITOLOGIA NEOTROPICAL | 22 | 569 | 576 | Calidad del hábitat | Aves | Sierra Tolistoque | Varios | tropical |
| Santos-Moreno, Antonio; Luis Garcia-Garcia, Jose; Rodriguez-Alamilla, Arisbe | 2010 | Ecology and reproduction of the bat Centurio senex (Chiroptera: Phyllostomidae) in Oaxaca, Mexico | REVISTA MEXICANA DE BIODIVERSIDAD | 81 | 847 | 852 | Calidad del hábitat | Mamíferos | Sierra Juárez | Oaxaca | tropical |
| Farias, Veronica; Fuller, Todd K. | 2009 | Native vegetation structure and persistence of endangered Tehuantepec jackrabbits in a neotropical savanna in Oaxaca, México | BIODIVERSITY AND CONSERVATION | 18 | ### | ### | Calidad del hábitat | Mamíferos | Lago Superior e Inferior | Oaxaca | tropical |
| Gonzalez-Gallina, Alberto; Benitez-Badillo, Griselda; Rojas-Soto, Octavio R.; Hidalgo-Mihart, Mircea G. | 2013 | The small, the forgotten and the dead: highway impact on vertebrates and its implications for mitigation strategies | BIODIVERSITY AND CONSERVATION | 22 | 325 | 342 | Conservación y manejo | Vertebrados | Cofre de Perote y Sierra Norte (Puebla y Veracruz) | Varios | semiárido |
| Hernandez-Stefanoni, JL; Pineda, JB; Valdes-Valadez, G | 2006 | Comparing the use of indigenous knowledge with classification and ordination techniques for assessing the species composition and structure of vegetation in a tropical forest | ENVIRONMENTAL MANAGEMENT | 37 | 686 | 702 | Conservación y manejo | Plantas | Península de Yucatán | Quintana Roo | tropical |
| de la Torre, Lucia; Maria Calvo-Irabien, Luz; Salazar, Carmen; Balslev, Henrik; Borchsenius, Finn | 2009 | Contrasting palm species and use diversity in the Yucatan Peninsula and the Ecuadorian Amazon | BIODIVERSITY AND CONSERVATION | 18 | ### | ### | Conservación y manejo | Plantas | Península de Yucatán | Yucatán | tropical |
| Feagin, Rusty A.; Smith, William K.; Psuty, Norbert P.; Young, Donald R.; Luisa Martinez, M.; Carter, Gregory A.; Lucas, Kelly L.; Gibeaut, James C.; Gemma, Jane N.; Koske, Richard E. | 2010 | Barrier Islands: Coupling Anthropogenic Stability with Ecological Sustainability | JOURNAL OF COASTAL RESEARCH | 26 | 987 | 992 | Conservación y manejo | N/A | N/A | N/A | N/A |
| Ramirez-Malagon, Rafael; Borodanenko, Anatoli; Perez-Moreno, Luis; Salas-Araiza, Manuel Dario; Nunez-Palenius, Hector Gordon; Ochoa-Alejo, Neftali | 2008 | In vitro propagation of three Agave species used for liquor distillation and three for landscape | PLANT CELL TISSUE AND ORGAN CULTURE | 94 | 201 | 207 | Conservación y manejo | Plantas | Noroeste de México | Varios | árido |
| Mendoza-Espinosa, L; Orozco-Borbon, MV; Silva-Nava, P | 2004 | Quality assessment of reclaimed water for its possible use for crop irrigation and aquifer recharge in Ensenada, Baja California, Mexico | WATER SCIENCE AND TECHNOLOGY | 50 | 285 | 291 | Conservación y manejo | N/A | Ensenada | Baja California | semiárido |
| Castellanos, A; Salinas, F; Ortega-Rubio, A | 2001 | Inventory and conservation of breeding waterbirds at Ojo de Liebre and Guerrero Negro Lagoons, Baja California Sur, Mexico | CIENCIAS MARINAS | 27 | 351 | 373 | Conservación y manejo | Aves | Lagunas Ojo de Liebre y Guerrero Negro | Baja california | árido |
| Suarez, Alfonso; Williams-Linera, Guadalupe; Trejo, Carlos; Ignacio Valdez-Hernandez, Juan; Manuel Cetina-Alcala, Victor; Vibrans, Heike | 2012 | Local knowledge helps select species for forest restoration in a tropical dry forest of central Veracruz, Mexico | AGROFORESTRY SYSTEMS | 85 | 35 | 55 | Restauración - Sucesión ecológica | Plantas | Veracruz | Veracruz | tropical |
| Jara, P.; Martinez, E.; Campo, J. | 2009 | N and P dynamics in the litter layer and soil of Mexican semi-arid forests, state of Morelos | AGRICULTURE ECOSYSTEMS & ENVIRONMENT | 130 | 164 | 170 | Ecosistemas | N/A | Morelos | Morelos | semiárido |
| Gao, Yan; Marpu, Prashanth; Niemeyer, Imgard; Runfola, Daniel Miller; Giner, Nicholas M.; Hamill, Thomas; Pontius, Robert Gilmore, Jr. | 2011 | Object-based classification with features extracted by a semi-automatic feature extraction algorithm - SEaTH | GEOCARTO INTERNATIONAL | 26 | 211 | 226 | Métodos de análisis | N/A | Michoacán | Michoacán | varios |
| Gonzalez-Gandara, C; Membrillo-Venegas, N; Nunez-Lara, E; Arias-Gonzalez, JE | 1999 | The relationship between fish and reefscapes in the Alacranes Reef, Yucatan, Mexico: A preliminary trophic functioning analysis | VIE ET MILIEU-LIFE AND ENVIRONMENT | 49 | 275 | 286 | Distribución | Arrecife | Arrecife Alacranes | Yucatán | tropical |
| Noguez, Ana M.; Escalante, Ana E.; Forney, Larry J.; Nava-Mendoza, Maribel; Rosas, Irma; Souza, Valeria; Garcia-Oliva, Felipe | 2008 | Soil aggregates in a tropical deciduous forest: effects on C and N dynamics, and microbial communities as determined by t-RFLPs | BIOGEOCHEMISTRY | 89 | 209 | 220 | Ecosistemas | Hongos y Bacterias | Chamela - Cuixmala | Jalisco | tropical |
| Vega-Zepeda, A.; Hernandez-Arana, H.; Carricart-Ganivet, J. P. | 2007 | Spatial and size-frequency distribution of Acropora (Cnidaria : Scleractinia) species in Chinchorro Bank, Mexican Caribbean: implications for management | CORAL REEFS | 26 | 671 | 676 | Heterogeneidad ambiental | Invertebrados | Caribe | Quintana Roo | Marino |
| Molina, David; Torres-Guerrero, Jaime; Avelarde-Gómez, María de la Luz | 2012 | Riqueza de aves del Área Natural Protegida Estero El Salado, Puerto Vallarta, Jalisco, México. Bird richness of the Natural Protected Area Estero El Salado, Puerto Vallarta, Jalisco, Mexico | Huitzil | 13 | 22 | 33 | Heterogeneidad ambiental | Aves | El Salado, Puerto Vallarta | Jalisco | Humedal |
| Terrados, Jorge; Ramirez-Garcia, Pedro | 2011 | Cover and edge length to area ratio of seagrass (Thalassia testudinum) meadows in coral reef lagoons (Veracruz Reef System, Southwest Gulf of Mexico) | AQUATIC CONSERVATION-MARINE AND FRESHWATER ECOSYSTEMS | 21 | 224 | 230 | Heterogeneidad ambiental | Plantas | Arrecife de Veracruz | Veracruz | Marino |
| Pompa-Garcia, Marin; Cerano-Paredes, Julian; Fule, Peter Z. | 2013 | Variation in radial growth of Pinus cooperi in response to climatic signals across an elevational gradient | DENDROCHRONOLOGIA | 31 | 198 | 204 | Heterogeneidad ambiental | Plantas | Sierra Madre occidental | Durango | templado |
| Santana, G. H.; Pretus, J. L.; Chust, G. | 2011 | Geometric attributes and spatial proportion of habitat assessment for moths in a seasonally dry tropical forest in Guerrero State, Mexico (Insecta: Lepidoptera) | SHILAP-REVISTA DE LEPIDOPTEROLOGIA | 39 | 189 | 203 | Distribución | Invertebrados | Norte de Guerrero | Guerrero | tropical |
| Sandoval Moreno, Adriana; Paleta Pérez, Guillermo | 2015 | La conformación de una región productiva contenciosa: el Distrito de Riego 024 Ciénega de Chapala, Michoacán, México | Desacatos |  | 132 | 149 | Conservación y manejo | N/A |  | Michoacán | humedal |
| MacGregor-Fors, I; Morales-Perez, L; Quesada, J; Schondube, JE | 2010 | Relationship between the presence of House Sparrows (Passer domesticus) and Neotropical bird community structure and diversity | BIOLOGICAL INVASIONS | 12 | 87 | 96 | Distribución | Aves | Cuitzeo | Michoacán | Humedal |
| Huerta-Martinez, FM; Vazquez-Garcia, JA; Garcia-Moya, E; Lopez-Mata, L; Vaquera-Huerta, H | 2004 | Vegetation ordination at the southern Chihuahuan Desert (San Luis Potosi, Mexico) | PLANT ECOLOGY | 174 | 79 | 87 | Distribución | Plantas | Desierto Chihuahuense | San Luis Potosí | semiárido |
| de la Luz, L; Luis, J; Navarro, P; Juan, J; Breceda, A | 2000 | A transitional xerophytic tropical plant community of the Cape Region, Baja California | JOURNAL OF VEGETATION SCIENCE | 11 | 555 | 564 | Distribución | Plantas | Desierto de Sonora | Baja California | tropical |
| Peinado, M.; Macias, M. A.; Delgadillo, J.; Aguirre, J. L. | 2006 | Major plant communities of North America's most and region: The San Felipe Desert, Baja California, Mexico | PLANT BIOSYSTEMS | 140 | 280 | 296 | Distribución | Plantas | Desierto de San Felipe | Baja California | árido |
| Ortega, J.; Navarrete, D.; Maldonado, J. E. | 2012 | Non-invasive sampling of endangered neotropical river otters reveals high levels of dispersion in the Lacantun River System of Chiapas, Mexico | ANIMAL BIODIVERSITY AND CONSERVATION | 35 | 59 | 69 | Distribución | Mamíferos | Lacandona | Chiapas | tropical |
| Vega, E.; Montana, C. | 2011 | Effects of overgrazing and rainfall variability on the dynamics of semiarid banded vegetation patterns: A simulation study with cellular automata | JOURNAL OF ARID ENVIRONMENTS | 75 | 70 | 77 | Distribución | Plantas | N/A | N/A | semiárido |
| Ortiz-Martiniz, Teresita; Rico-Gray, Victor | 2007 | Spider monkeys (Ateles geoffroyi vellerosus) in a tropical deciduous forest in Tehuantepec, Oaxaca, Mexico | SOUTHWESTERN NATURALIST | 52 | 393 | 399 | Distribución | Mamíferos | Istmo de Tehuantepec | Oaxaca | tropical |
| Ramirez-Bautista, Aurelio; Cruz-Elizalde, Raciel | 2013 | Reptile community structure in two fragments of cloud forest of the Sierra Madre Oriental, Mexico | NORTH-WESTERN JOURNAL OF ZOOLOGY | 9 | 410 | 417 | Distribución | Reptiles | Noroeste de México | Hidalgo | mesófilo |
| Lopez-Toledo, Leonel; Portillo-Cruz, Yazmin; Pulido, Maria T.; Endress, Bryan A. | 2013 | Seed dynamics of an endemic palm in a Northwestern Mexican tropical dry forest: implications for population spatial structure | PLANT ECOLOGY | 214 | ### | ### | Distribución | Plantas | Noroeste de México | Sonora | tropical |
| Araiza, Victoria; Naranjo-Garcia, Edna | 2013 | Systematic checklist of the terrestrial malacofauna from Atoyac, Veracruz | REVISTA MEXICANA DE BIODIVERSIDAD | 84 | 765 | 773 | Distribución | Invertebrados | Veracruz | Veracruz | tropical |
| Gamper, Heather A.; Koptur, Suzanne; Garcia-Franco, Jose; Stapper, Andres Plata | 2011 | Alteration of forest structure modifies the distribution of scale insect, Stigmacoccus garmilleri, in Mexican tropical montane cloud forests | JOURNAL OF INSECT SCIENCE | 11 |  |  | Distribución | Invertebrados | Chiconquiaco | Veracruz | mesófilo |
| Carmona, Roberto; Ayala-Pérez, Víctor; Gutiérrez Aguilar, Antonio | 2011 | New and noteworthy waterfowl records at artificial wetlands from Baja California Sur, Mexico. Registros nuevos y sobresalientes de anátidos en humedales artificiales de Baja California Sur, México | Revista mexicana de biodiversidad | 82 | 727 | 730 | Distribución | Aves | Baja California | Baja california | Humedal |
| Gabriela Naranjo-Lopez, Alma; Luis Navarrete-Heredia, Jose | 2011 | Carrion beetles (Histeridae, Silphidae and Scarabaeidae) from two localities in Gomez Farias, Jalisco, Mexico | REVISTA COLOMBIANA DE ENTOMOLOGIA | 37 | 103 | 110 | Distribución | Invertebrados | Gomez Farias | Jalisco | semiárido |
| Kampichler, Christian; Calme, Sophie; Weissenberger, Holger; Louis Arriaga-Weiss, Stefan | 2010 | Indication of a species in an extinction vortex: The ocellated turkey on the Yucatan peninsula, Mexico | ACTA OECOLOGICA-INTERNATIONAL JOURNAL OF ECOLOGY | 36 | 561 | 568 | Conservación y manejo | Aves | Península de Yucatán | Varios | tropical |
| del Rocio Balam-Ballote, Yariely; Leon-Cortes, Jorge L. | 2010 | Forest management and biodiversity: A study of an indicator insect group in southern México | INTERCIENCIA | 35 | 526 | 533 | Conservación y manejo | Invertebrados | Sureste de México | Chiapas | tropical |
| Broom, D. M.; Galindo, F. A.; Murgueitio, E. | 2013 | Sustainable, efficient livestock production with high biodiversity and good welfare for animals | PROCEEDINGS OF THE ROYAL SOCIETY B-BIOLOGICAL SCIENCES | 280 |  |  | Conservación y manejo | N/A | México (País) | Varios | varios |
| Valencia-Diaz, Susana; Flores-Palacios, Alejandro; Castillo-Campos, Gonzalo | 2012 | Population size and habitat characteristics of Mammillaria eriacantha, an endemic species of central Mexico | BOTANICAL SCIENCES | 90 | 195 | 202 | Conservación y manejo | Plantas | Centro de México | Veracruz | semiárido |
| Gerardo Avila-Torresagaton, Luis; Hidalgo-Mihart, Mircea; Antonio Guerrero, Jose | 2012 | The importance of Palenque, Chiapas, for the conservation of Mexican bats | REVISTA MEXICANA DE BIODIVERSIDAD | 83 | 184 | 193 | Conservación y manejo | Mamíferos | Palenque | Chiapas | tropical |
| Garcia-Grajales, Jesus | 2013 | THE HUMAN-CROCODILE CONFLICT IN MEXICO: CAUSES AND IMPLICATIONS | INTERCIENCIA | 38 | 881 | 884 | Conservación y manejo | Reptiles | México (País) | Varios | tropical |
| Almaraz-Almaraz, M. E.; Leon-Cortes, J. L.; Molina-Martinez, A. | 2013 | The Population Ecology and Conservation of Pterourus esperanza (Insecta: Lepidoptera): An Ancestral Swallowtail Butterfly in the Northern Sierra of Oaxaca, Mexico | ANNALS OF THE ENTOMOLOGICAL SOCIETY OF AMERICA | 106 | 753 | 760 | Conservación y manejo | Invertebrados | Sierra Norte de Oaxaca | Oaxaca | tropical |
| Ordano, M.; Guillen, L.; Rull, J.; Lasa, R.; Aluja, M. | 2013 | Temporal dynamics of diversity in a tropical fruit fly (Tephritidae) ensemble and their implications on pest management and biodiversity conservation | BIODIVERSITY AND CONSERVATION | 22 | ### | ### | Conservación y manejo | Invertebrados | Apazapan y Martínez de la Torre | Veracruz | tropical |
| Flores, Jose Salvador; Bautista, Francisco | 2012 | Knowledge of the Yucatec Maya in seasonal tropical forest management: the forage plants | REVISTA MEXICANA DE BIODIVERSIDAD | 83 | 503 | 518 | Conservación y manejo | Plantas | Península de Yucatán | Varios | tropical |
| Vega, A. Munguia; Estrella, Rodriguez; Blazquez, M. C. | 2007 | Characterization of nine microsatellite loci on endemic kangaroo rats Dipodomys simulans peninsularis from southern Baja California Peninsula | MOLECULAR ECOLOGY NOTES | 7 | 127 | 129 | Genética del paisaje | Mamíferos | Baja california | Varios | árido |
| Rodriguez-Estrella, R; Blazquez, MC; Vega, AM | 2006 | Characterization of seven polymorphic microsatellite loci in the Baja California endemic black-tailed brush lizard Urosaurus nigricaudus | MOLECULAR ECOLOGY NOTES | 6 | 465 | 467 | Genética del paisaje | Reptiles | Baja California | Varios | árido |
| Skinner, CN; Burk, JH; Barbour, MG; Franco-Vizcaino, E; Stephens, SL | 2008 | Influences of climate on fire regimes in montane forests of north-western Mexico | JOURNAL OF BIOGEOGRAPHY | 35 | ### | ### | Heterogeneidad ambiental | N/A | Noroeste de México | Baja California | montaña |
| Moreno-Casasola, P.; Rosas, H. Lopez; Mata, D. Infante; Peralta, L. A.; Travieso-Bello, A. C.; Warner, B. G. | 2009 | Environmental and anthropogenic factors associated with coastal wetland differentiation in La Mancha, Veracruz, Mexico | PLANT ECOLOGY | 200 | 37 | 52 | Heterogeneidad ambiental | N/A | La Mancha | Veracruz | Humedal |
| Pease, Allison A.; Gonzalez-Diaz, Alfonso A.; Rodiles-Hernandez, Rocio; Winemiller, Kirk O. | 2012 | Functional diversity and trait-environment relationships of stream fish assemblages in a large tropical catchment | FRESHWATER BIOLOGY | 57 | ### | ### | Heterogeneidad ambiental | N/A | Río Grijalva, sur de México (Chiapas y Tabasco) | Varios | tropical |
| Halffter, Gonzalo; Pineda, Eduardo; Arellano, Lucrecia; Escobar, Federico | 2007 | Instability of copronecrophagous beetle assemblages (Coleoptera : Scarabaeinae) in a mountainous tropical landscape of Mexico | ENVIRONMENTAL ENTOMOLOGY | 36 | ### | ### | Heterogeneidad ambiental | Invertebrados | Xalapa | Veracruz | mesófilo |
| Smith, Brian Tilston; Ribas, Camila C.; Whitney, Bret M.; Hernandez-Banos, Blanca E.; Klicka, John | 2013 | Identifying biases at different spatial and temporal scales of diversification: a case study in the Neotropical parrotlet genus Forpus | MOLECULAR ECOLOGY | 22 | 483 | 494 | Heterogeneidad ambiental | Aves | México y otros países | N/A | tropical |
| Bonnell, Tyler R.; Dutilleul, Pierre; Chapman, Colin A.; Reyna-Hurtado, Rafael; Uriel Hernandez-Sarabia, Raul; Sengupta, Raja | 2013 | Analysing small-scale aggregation in animal visits in space and time: the ST-BBD method | ANIMAL BEHAVIOUR | 85 | 483 | 492 | Heterogeneidad ambiental | Mamíferos | N/A | N/A | N/A |
| Mendoza-Hernandez, Pedro E.; Rosete-Rodriguez, Alejandra; Sanchez-Coronado, Maria E.; Orozco, Susana; Pedrero-Lopez, Luis; Mendez, Ignacio; Orozco-Segovia, Alma | 2014 | Vegetation patches improve the establishment of Salvia mexicana seedlings by modifying microclimatic conditions | INTERNATIONAL JOURNAL OF BIOMETEOROLOGY | 58 | 853 | 866 | Heterogeneidad ambiental | Plantas | Parque Ecológico de la Ciudad de México | Estado de México | templado |
| Guadarrama, P.; Castillo, S.; Ramos-Zapata, J. A.; Hernandez-Cuevas, L. V.; Camargo-Ricalde, S. L. | 2014 | Arbuscular mycorrhizal fungal communities in changing environments: The effects of seasonality and anthropogenic disturbance in a seasonal dry forest | PEDOBIOLOGIA | 57 | 87 | 95 | Heterogeneidad ambiental | Hongos | Nizanda | Oaxaca | tropical |
| Riojas-Lopez, M. E. | 2012 | Response of rodent assemblages to change in habitat heterogeneity in fruit-oriented nopal orchards in the Central High Plateau of Mexico | JOURNAL OF ARID ENVIRONMENTS | 85 | 27 | 32 | Heterogeneidad ambiental | Mamíferos | Ojuelos | Jalisco | semiárido |
| PÉREZ-IRINEO, Gabriela; SANTOS-MORENO, Antonio | 2010 | Diversity of a community of carnivorous mammals in a subcaducifolious tropical forest of northeastern Oaxaca, Mexico | Acta zoológica mexicana | 26 | 721 | 736 | Heterogeneidad ambiental | Mamíferos | San Miguel Soyaltepec | Oaxaca | tropical |
| Santibanez-Andrade, Gabriela; Castillo-Arguero, Silvia; Alejandro Zavala-Hurtado, Jose; Martinez Orea, Yuriana; Hernandez Apolinar, Mariana | 2009 | Environmental heterogeneity in a xerophytic matorral | BOLETIN DE LA SOCIEDAD BOTANICA DE MEXICO | 85 | 71 | 79 | Heterogeneidad ambiental | Plantas | Reserva Ecológica Pedregal de San Ángel | Estado de México | semiárido |
| Antonio Gomez-Anaya, Jose; Novelo-Gutierrez, Rodolfo; Ramirez, Alonso; Arce-Perez, Roberto | 2014 | Using empirical field data of aquatic insects to infer a cut-off slope value in asymptotic models to assess inventories completeness | REVISTA MEXICANA DE BIODIVERSIDAD | 85 | 218 | 227 | Heterogeneidad ambiental | Invertebrados | Zimapán y Coalcomán (Hidalgo y Michoacán) | Varios | varios |
| Moreno, CE; Halffter, G | 2000 | Assessing the completeness of bat biodiversity inventories using species accumulation curves | JOURNAL OF APPLIED ECOLOGY | 37 | 149 | 158 | Métodos de análisis | Mamíferos | Veracruz | Veracruz | tropical |
| HALFFTER, Gonzalo; RÖS, Matthias | 2013 | A strategy for measuring biodiversity. | Acta zoológica mexicana | 29 | 400 | 411 | Métodos de análisis | N/A | N/A | N/A | N/A |
| Flores, JLF; Yeaton, RI | 2000 | The role of competition in plant community organization in the Mexican highlands | INTERCIENCIA | 25 | 365 | + | Interacciones | Plantas | Desierto Chihuahuense | Chihuahua | semiárido |
| Zoe Lara-Rodriguez, Nubia; Diaz-Valenzuela, Roman; Martinez-Garcia, Vanessa; Mauricio-Lopez, Edith; Anaid-Diaz, Silvia; Israel Valle, Oscar; Denisse Fisher-de Leon, Ana; Lara, Carlos; Ortiz-Pulido, Raul | 2012 | Hummingbird-plant mutualistic networks in central-eastern Mexico | REVISTA MEXICANA DE BIODIVERSIDAD | 83 | 569 | 577 | Interacciones | Aves | Centro de México | Varios | varios |
| Figueroa-Esquivel, Elsa M.; Puebla-Olivares, Fernando | 2009 | Importance of a tropical tree (Dendropanax arboreus) for Neartic migrant birds in Mexico | ORNITOLOGIA NEOTROPICAL | 20 | 391 | 399 | Interacciones | Aves | Los Tuxtlas | Veracruz | tropical |
| Octavio-Aguilar, P; Gonzalez-Astorga, J; Vovides, AP | 2008 | Population dynamics of the Mexican cycad Dioon edule Lindl. (Zamiaceae): life history stages and management impact | BOTANICAL JOURNAL OF THE LINNEAN SOCIETY | 157 | 381 | 391 | Poblaciones | Plantas | Centro de Veracruz | Veracruz | tropical |
| Diaz-Rodriguez, Berenice; del-Val, Ek; Gomez-Romero, Mariela; Angelica Gomez-Ruiz, Pilar; Lindig-Cisneros, Roberto | 2013 | Conditions for establishment of a key restoration species, lupinus elegans kunth, in a mexican temperate forest | BOTANICAL SCIENCES | 91 | 225 | 232 | Restauración - Sucesión ecológica | Plantas | San Juan Parangaricutiro | Michoacán | templado |
| Alberto Salinas-Rodriguez, Sergio; Ramirez-Marcial, Neptali | 2010 | El Triunfo biosphere reserve rivers, a diagnosis for their hydrological restoration | HIDROBIOLOGICA | 20 | 91 | 100 | Restauración - Sucesión ecológica | N/A | Sierra Madre de Chiapas | Chiapas | Humedal |
| Allen, MF; Allen, EB; Gomez-Pompa, A | 2005 | Effects of mycorrhizae and nontarget organisms on restoration of a seasonal tropical forest in Quintana Roo, Mexico: Factors limiting tree establishment | RESTORATION ECOLOGY | 13 | 325 | 333 | Restauración - Sucesión ecológica | Varios | Península de Yucatán | Quintana Roo | tropical |
